# Supplementary material for: Bioactive norditerpenoids and neolignans from the roots of salvia miltiorrhiza
Source: Royal Society of Chemistry journal article supplement (doi:10.1039/c6ob01784c), 2016-01-01
Supplement: c6ob01784c1.pdf [file c6ob01784c1.pdf]

# Bioactive Norditerpenoids and Neolignans from the Roots of *Salvia miltiorrhiza*<sup>†</sup>

Ling-Zhi Li,<sup>a</sup> Xiao Liang,<sup>b</sup> Xue Sun,<sup>a</sup> Xiao-Li Qi,<sup>a</sup> Jian Wang,<sup>c</sup> Qing-Chun Zhao,<sup>d</sup> and Shao-  
Jiang Song\*<sup>a</sup>

---

<sup>a</sup> School of Traditional Chinese Materia Medica, Key Laboratory of Structure-Based Drug Design and Discovery, Ministry of Education, Shenyang Pharmaceutical University, Shenyang 110016, P. R. China. E-mail: songsj99@163.com

<sup>b</sup> College of Pharmacy, Liaoning University, Shenyang 110036, P. R. China.

<sup>c</sup> School of Pharmaceutical Engineering, Shenyang Pharmaceutical University, Shenyang 110016, P. R. China.

<sup>d</sup> Department of Pharmacy, General Hospital of Shenyang Military Area Command, Shenyang 110840, P. R. China.

<sup>†</sup> Electronic Supplementary Information (ESI) available: See DOI: 10.1039/x0xx00000x

## Supporting Information

### Table of Contents

#### 1. Supplementary Figures

|     |                                                                                         |    |
|-----|-----------------------------------------------------------------------------------------|----|
| S1  | HRESIMS spectrum of <b>1</b> .....                                                      | 4  |
| S2  | IR spectrum of <b>1</b> .....                                                           | 5  |
| S3  | <sup>1</sup> H NMR spectrum of <b>1</b> tested in .....                                 | 6  |
| S4  | <sup>13</sup> C NMR spectrum of <b>1</b> tested in C <sub>5</sub> D <sub>5</sub> N..... | 7  |
| S5  | HSQC spectrum of <b>1</b> tested in C <sub>5</sub> D <sub>5</sub> N.....                | 8  |
| S6  | HMBC spectrum of <b>1</b> tested in C <sub>5</sub> D <sub>5</sub> N.....                | 9  |
| S7  | Single-crystal X-ray structure of <b>1</b> .....                                        | 10 |
| S8  | HRESIMS spectrum of <b>2</b> .....                                                      | 11 |
| S9  | IR spectrum of <b>2</b> .....                                                           | 12 |
| S10 | <sup>1</sup> H NMR spectrum of <b>2</b> tested in CD <sub>3</sub> OD.....               | 13 |
| S11 | <sup>13</sup> C NMR spectrum of <b>2</b> tested in CD <sub>3</sub> OD.....              | 14 |
| S12 | HSQC spectrum of <b>2</b> tested in CD <sub>3</sub> OD.....                             | 15 |
| S13 | HMBC correlations and spectrum of <b>2</b> tested in CD <sub>3</sub> OD.....            | 16 |
| S14 | NOESY spectrum of <b>2</b> tested in CD <sub>3</sub> OD.....                            | 17 |
| S15 | HRESIMS spectrum of <b>3</b> .....                                                      | 18 |
| S16 | IR spectrum of <b>3</b> .....                                                           | 19 |
| S17 | <sup>1</sup> H NMR spectrum of <b>3</b> tested in CD <sub>3</sub> OD.....               | 20 |
| S18 | <sup>13</sup> C NMR spectrum of <b>3</b> tested in CD <sub>3</sub> OD.....              | 21 |
| S19 | HSQC spectrum of <b>3</b> tested in CD <sub>3</sub> OD.....                             | 22 |
| S20 | HMBC spectrum of <b>3</b> tested in CD <sub>3</sub> OD.....                             | 23 |
| S21 | NOESY spectrum of <b>3</b> tested in CD <sub>3</sub> OD.....                            | 24 |
| S22 | HRESIMS spectrum of <b>4</b> .....                                                      | 25 |
| S23 | IR spectrum of <b>4</b> .....                                                           | 26 |
| S24 | <sup>1</sup> H NMR spectrum of <b>4</b> tested in DMSO- <i>d</i> <sub>6</sub> .....     | 27 |
| S25 | <sup>13</sup> C NMR spectrum of <b>4</b> tested in DMSO- <i>d</i> <sub>6</sub> .....    | 28 |
| S26 | HSQC spectrum of <b>4</b> tested in DMSO- <i>d</i> <sub>6</sub> .....                   | 29 |
| S27 | HMBC spectrum of <b>4</b> tested in DMSO- <i>d</i> <sub>6</sub> .....                   | 30 |
| S28 | NOESY spectrum of <b>4</b> tested in DMSO- <i>d</i> <sub>6</sub> .....                  | 31 |
| S29 | HRESIMS spectrum of <b>5</b> tested in CD <sub>3</sub> OD.....                          | 32 |
| S30 | <sup>1</sup> H NMR spectrum of <b>5</b> tested in CD <sub>3</sub> OD.....               | 33 |
| S31 | <sup>13</sup> C NMR spectrum of <b>5</b> tested in CD <sub>3</sub> OD.....              | 34 |
| S32 | HMBC spectrum of <b>5</b> tested in DMSO- <i>d</i> <sub>6</sub> .....                   | 35 |
| S33 | Single-crystal X-ray data of <b>1</b> .....                                             | 36 |
| S34 | The chiral HPLC chromatogram of <b>1</b> .....                                          | 47 |
| S35 | The chiral HPLC chromatogram of <b>2</b> .....                                          | 47 |
| S36 | The chiral HPLC chromatogram of <b>3</b> .....                                          | 48 |
| S37 | The chiral HPLC chromatogram of <b>4</b> .....                                          | 48 |
| S38 | The CD spectra of <b>1</b> in MeOH.....                                                 | 49 |
| S39 | The CD spectra of <b>1a</b> in MeOH.....                                                | 50 |
| S40 | The CD spectra of <b>1b</b> in MeOH.....                                                | 51 |

|     |                                                                   |    |
|-----|-------------------------------------------------------------------|----|
| S41 | The CD spectra of <b>2a</b> in MeOH.....                          | 52 |
| S42 | The CD spectra of <b>2b</b> in MeOH.....                          | 53 |
| S43 | The CD spectra of <b>3a</b> in MeOH.....                          | 54 |
| S44 | The CD spectra of <b>3b</b> in MeOH.....                          | 55 |
| S45 | The calculated CD spectra of <b>3a</b> and <b>3b</b> in MeOH..... | 56 |
| S46 | The CD spectra of <b>4a</b> in MeOH.....                          | 57 |
| S47 | The CD spectra of <b>4b</b> in MeOH.....                          | 58 |
| S48 | The calculated CD spectra of <b>4a</b> and <b>4b</b> in MeOH..... | 59 |
| S49 | ES-MS spectrum of <b>1</b> .....                                  | 60 |
| S50 | ES-MS spectrum of <b>2</b> .....                                  | 63 |
| S51 | ES-MS spectrum of <b>3</b> .....                                  | 66 |
| S52 | ES-MS spectrum of <b>4</b> .....                                  | 69 |

### Supplementary Tables

|   |                                                                                    |    |
|---|------------------------------------------------------------------------------------|----|
| 1 | Conformations of <b>1a</b> and <b>1b</b> .....                                     | 71 |
| 2 | Conformations of <b>2a</b> and <b>2b</b> .....                                     | 72 |
| 3 | Conformations of <b>3a</b> and <b>3b</b> .....                                     | 73 |
| 4 | Conformations of <b>4a</b> and <b>4b</b> .....                                     | 74 |
| 5 | The toxic effect of isolates in H9c2 cells after 24 h incubation.....              | 75 |
| 6 | The cytoprotective effects of the isolates assessed using LDH leakage assays ..... | 76 |
| 7 | The toxic effect of isolates in LPS-induced N9 cell viability.....                 | 77 |

# S1 HRESIMS spectrum of 1

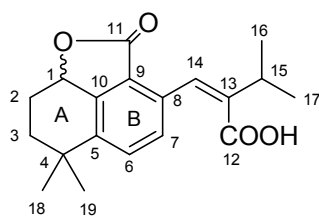

## Compound Mass Spectrum List Report

**Analysis Info**  
 Analysis Name: H:\ds\DS-7\_XIN.d  
 Method: tune\_low.m  
 Sample Name: DUI  
 Comment:  
 Acquisition Date: 2008-10-28 15:09:08  
 Operator: Bruker Customer  
 Instrument / Ser#: micrOTOF-Q 125

**Acquisition Parameter**  
 Source Type: ESI  
 Ion Polarity: Positive  
 Source Temperature: 100 °C  
 Nebulizer: 0.4 Bar  
 S-lens Voltage: 10 V  
 Capillary Voltage: 4500 V  
 Dry Gas Flow: 10 L/min  
 End Plate Offset: -500 V  
 Dry Gas Temperature: 150 °C  
 Collision Cell RF: 40.0 Vpp  
 Collision Cell Gas: Source

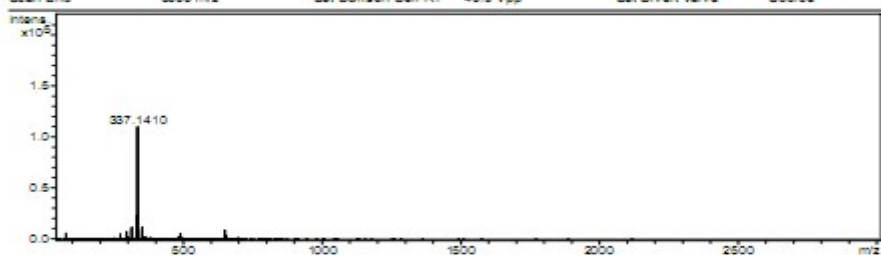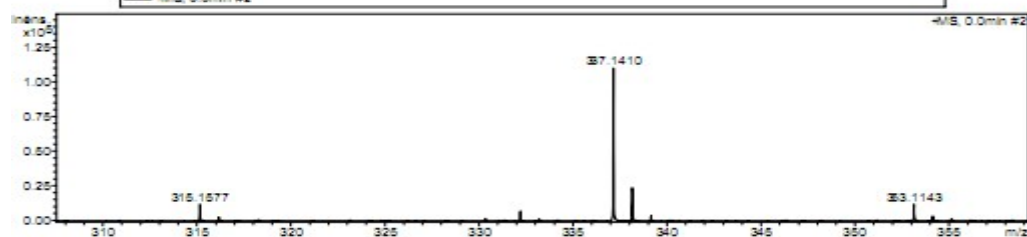

| # | m/z      | I      |
|---|----------|--------|
| 1 | 315.1577 | 11555  |
| 2 | 337.1410 | 110105 |
| 3 | 353.1143 | 11725  |

  

| Sum Formula                                                    | Sigma | m/z      | Err (ppm) | Mean Err (ppm) | Err (mDa) | rdB  | N Rule | s    |
|----------------------------------------------------------------|-------|----------|-----------|----------------|-----------|------|--------|------|
| C <sub>19</sub> H <sub>22</sub> Na <sub>1</sub> O <sub>4</sub> | 0.122 | 337.1410 | 0.01      | 0.01           | 0.00      | 8.50 | ok     | even |

## S2 IR spectrum of 1

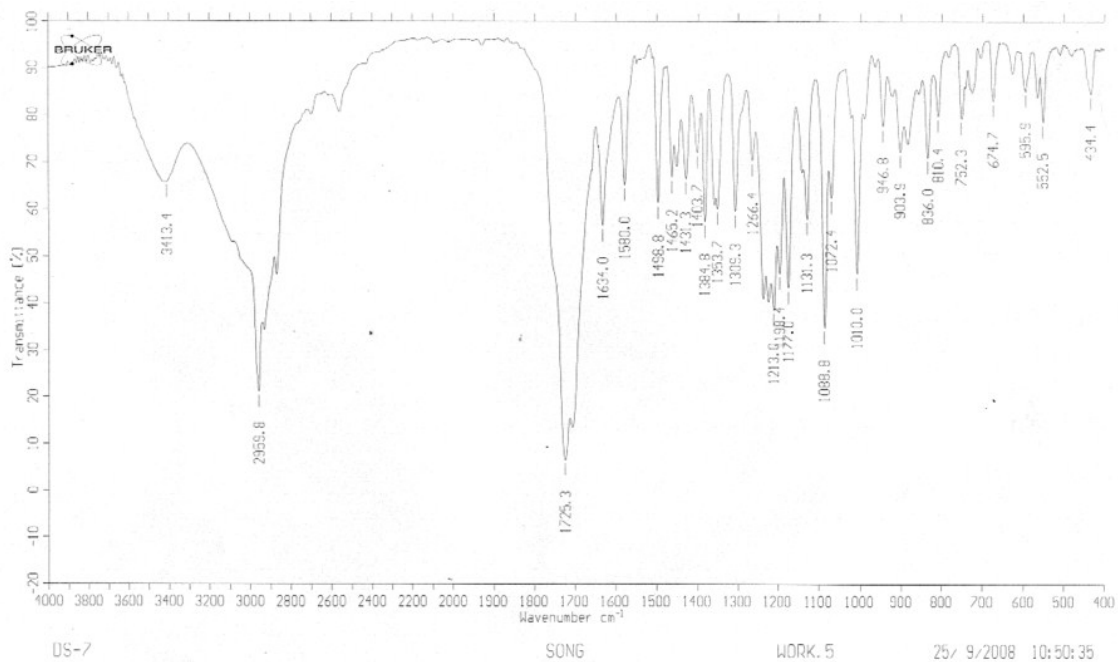

# S3 <sup>1</sup>H NMR spectrum of 1 tested in C<sub>5</sub>D<sub>5</sub>N

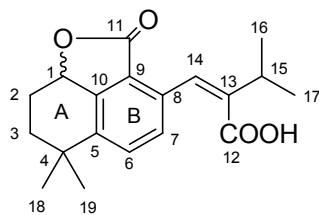

AV-600-1H  
Sample: DS-7

8.6803  
8.0239  
8.0107  
7.5915  
7.5254  
7.2999  
7.2910  
7.2866  
7.1589

5.0637  
5.0551  
5.0443  
5.0358  
3.0452  
3.0345  
3.0334  
3.0227  
3.0117  
3.0000  
2.0970  
2.0884  
2.0835  
2.0780  
2.0718  
1.5728  
1.5668  
1.5582  
1.5515  
1.3948  
1.3860  
1.3757  
1.3670  
1.3563  
1.3399  
1.1559  
0.9438

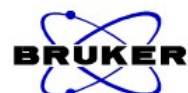

```

NAME          DS-TM-HS
EXPNO         1
PROCNO        1
Date_         20081021
Time          13.42
INSTRUM       spect
PROBHD        5 mm PABBO 1H
PULPROG       zgpg30
TD            65536
SOLVENT       Pye
NS            600
DSH           0.000000
SWH           17988.61 Hz
FIDRES        0.274432 Hz
AQ            1.841978 sec
RG            320
AQ           0.000000 sec
DE           6.50 usec
TE            300.2 K
NUC1           1
NUC2           1
H2O           1.00000000 sec
----- CHANNEL f1 -----
NUC1           1H
P1            11.00 usec
PL1           +1.00 dB
PC1           34.70088872 W
SFO1          800.1300000 MHz
SF            800.1300000 MHz
WDW           EM
SSB           0
GB            0
PC            0.50 dB
RG            1.00
  
```

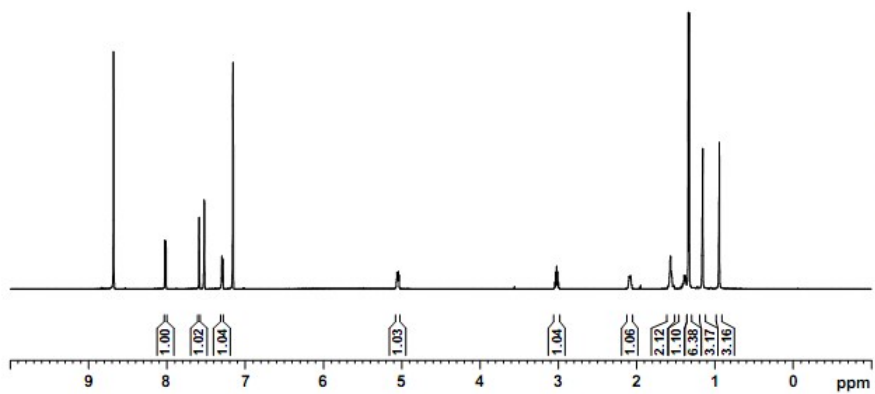

S4 <sup>13</sup>C NMR spectrum of 1 tested in C<sub>5</sub>D<sub>5</sub>N

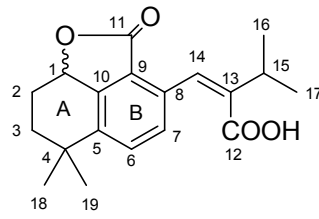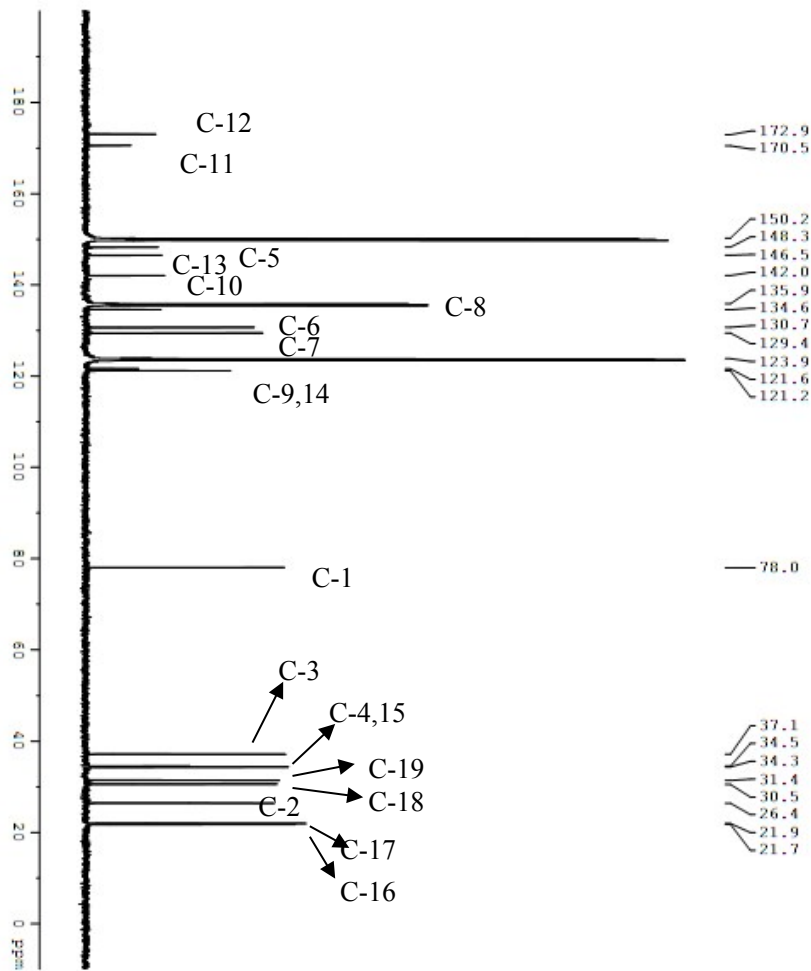

AV-600-13C  
Sample: DS-7

```

NAME: DS-T-1-9
EXPNO: 1
PROCNO: 1
DATE_: 20081024
TIME: 9.10
INSTRUM: spect
PROBHD: 5 mm F400 BB-
PULPROG: zgpg30
TD: 65536
SOLVENT: DMS
NS: 202
DS: 4
AQ: 4.8600000
RG: 0.7200000
DE: 11.0000000
TE: 300.2
D1: 4.0000000
D11: 0.0000000
TD0: 1

===== CHANNEL f1 =====
NUC1: 13C
P1: 1.9000000
PL1: 0.0000000
PR1: 93.0000000
RG1: 0.7200000
RO1: 150.0000000
WDW: EM
SSB: 0
LB1: 1.0000000
GB1: 0
PC1: 1.0000000
===== CHANNEL f2 =====
CPDPRG2: waltz16
NUC2: 1H
PCPD2: 90.0000000
PL2: 1.0000000
PL12: 1.0000000
PL13: 1.0000000
PL14: 1.0000000
PL15: 1.0000000
PL16: 1.0000000
PL17: 1.0000000
PL18: 1.0000000
PL19: 1.0000000
PL20: 1.0000000
PL21: 1.0000000
PL22: 1.0000000
PL23: 1.0000000
PL24: 1.0000000
PL25: 1.0000000
PL26: 1.0000000
PL27: 1.0000000
PL28: 1.0000000
PL29: 1.0000000
PL30: 1.0000000
PL31: 1.0000000
PL32: 1.0000000
PL33: 1.0000000
PL34: 1.0000000
PL35: 1.0000000
PL36: 1.0000000
PL37: 1.0000000
PL38: 1.0000000
PL39: 1.0000000
PL40: 1.0000000
PL41: 1.0000000
PL42: 1.0000000
PL43: 1.0000000
PL44: 1.0000000
PL45: 1.0000000
PL46: 1.0000000
PL47: 1.0000000
PL48: 1.0000000
PL49: 1.0000000
PL50: 1.0000000
PL51: 1.0000000
PL52: 1.0000000
PL53: 1.0000000
PL54: 1.0000000
PL55: 1.0000000
PL56: 1.0000000
PL57: 1.0000000
PL58: 1.0000000
PL59: 1.0000000
PL60: 1.0000000
PL61: 1.0000000
PL62: 1.0000000
PL63: 1.0000000
PL64: 1.0000000
PL65: 1.0000000
PL66: 1.0000000
PL67: 1.0000000
PL68: 1.0000000
PL69: 1.0000000
PL70: 1.0000000
PL71: 1.0000000
PL72: 1.0000000
PL73: 1.0000000
PL74: 1.0000000
PL75: 1.0000000
PL76: 1.0000000
PL77: 1.0000000
PL78: 1.0000000
PL79: 1.0000000
PL80: 1.0000000
PL81: 1.0000000
PL82: 1.0000000
PL83: 1.0000000
PL84: 1.0000000
PL85: 1.0000000
PL86: 1.0000000
PL87: 1.0000000
PL88: 1.0000000
PL89: 1.0000000
PL90: 1.0000000
PL91: 1.0000000
PL92: 1.0000000
PL93: 1.0000000
PL94: 1.0000000
PL95: 1.0000000
PL96: 1.0000000
PL97: 1.0000000
PL98: 1.0000000
PL99: 1.0000000
PL100: 1.0000000

```

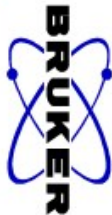

# S5 HSQC spectrum of 1 tested in C<sub>5</sub>D<sub>5</sub>N



AV-600-HSQC  
Sample: DS-7-H-B

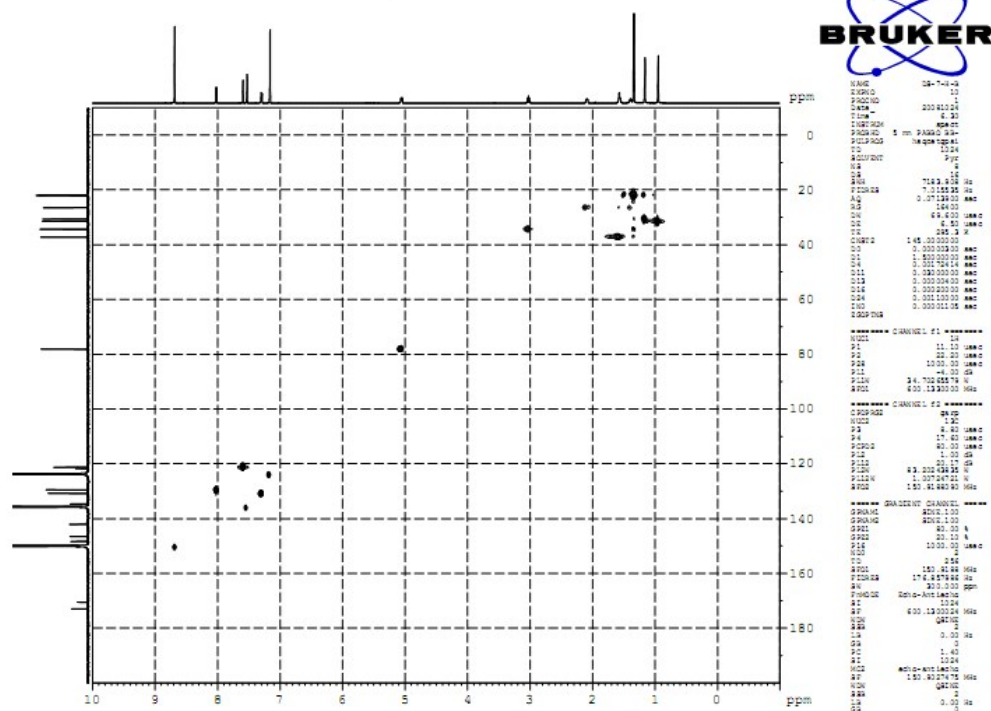



S6 HMBC spectrum of 1 tested in  $C_5D_5N$

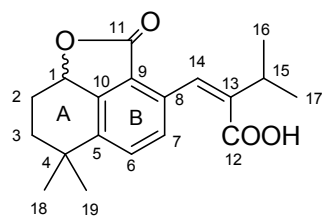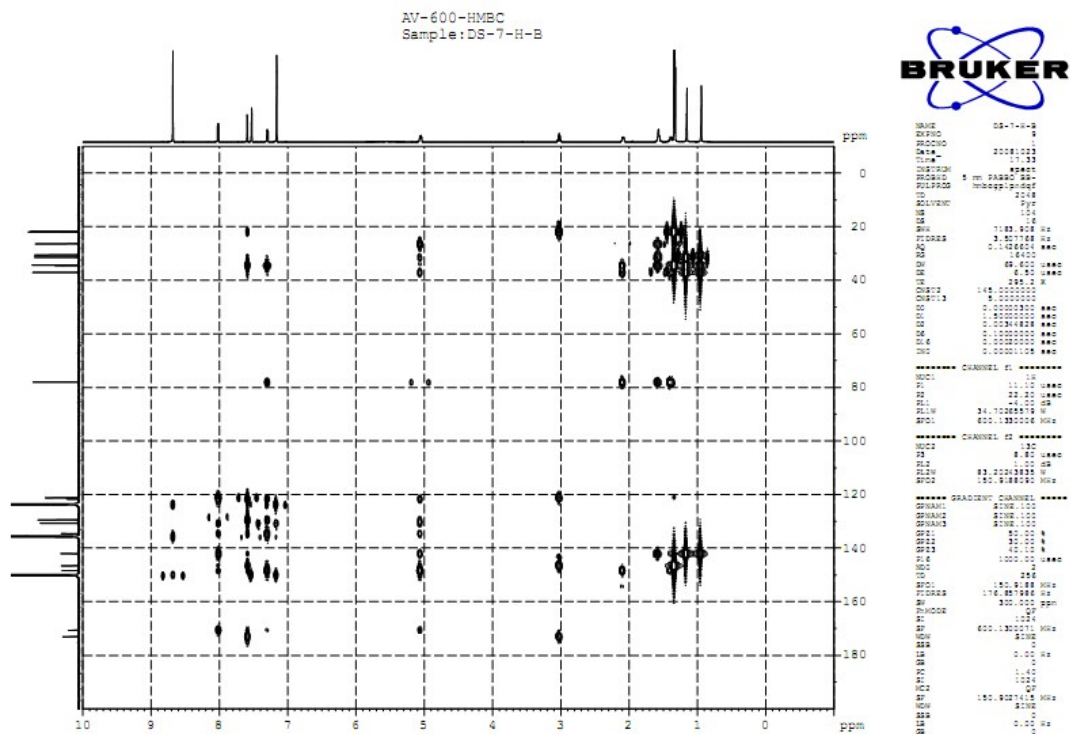

## S7 Single-crystal X-ray structure of 1

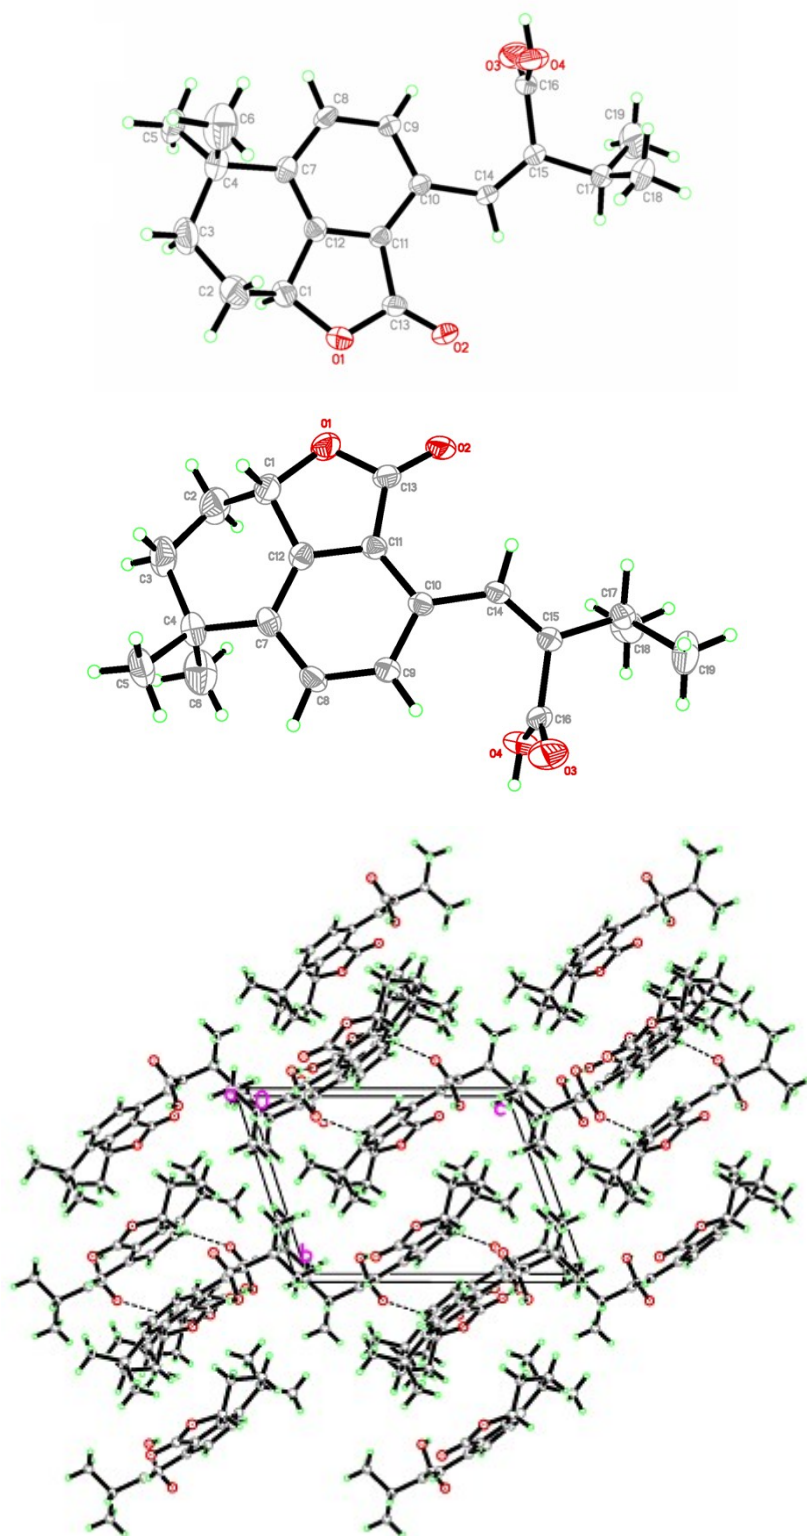

## S8 HRESIMS spectrum of 2

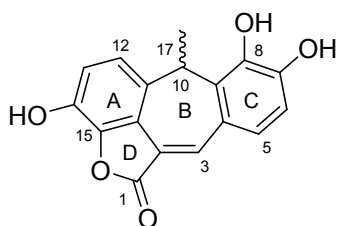

### Compound Mass Spectrum List Report

#### Analysis Info

Analysis Name H:\da\DS-1 XIN.d  
 Method tune\_low.m  
 Sample Name DUI  
 Comment

Acquisition Date 2008-10-26 15:01:28

Operator Bruker Customer  
 Instrument / Ser# micrOTOF-Q 125

#### Acquisition Parameter

|             |          |                       |           |                  |           |
|-------------|----------|-----------------------|-----------|------------------|-----------|
| Source Type | ESI      | Ion Polarity          | Positive  | Set Nebulizer    | 0.4 Bar   |
| Focus       | Active   | Set Capillary         | 4500 V    | Set Dry Heater   | 190 °C    |
| Scan Begin  | 50 m/z   | Set End Plate Offset  | -500 V    | Set Dry Gas      | 4.0 l/min |
| Scan End    | 3000 m/z | Set Collision Cell RF | 120.0 Vpp | Set Divert Valve | Source    |

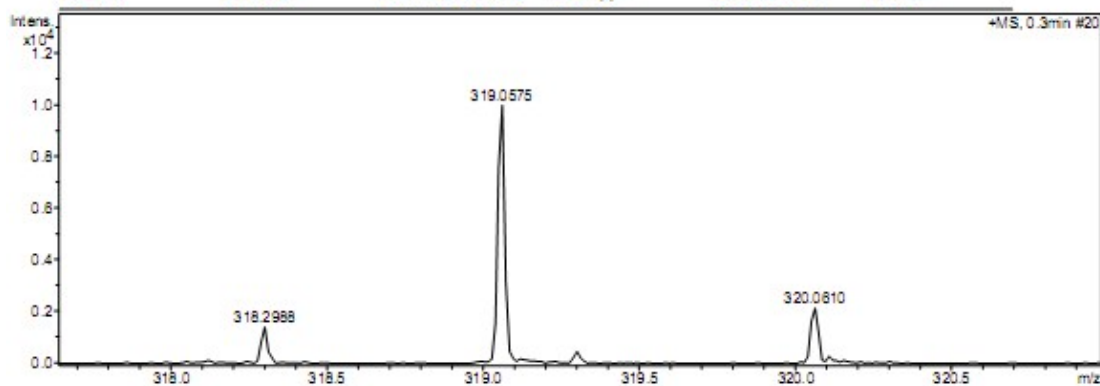

| # | m/z      | I    |
|---|----------|------|
| 1 | 318.2988 | 1397 |
| 2 | 319.0575 | 9978 |
| 3 | 320.0810 | 2129 |

| Sum Formula                                                    | Sigma | m/z      | Err (ppm) | Mean Err (ppm) | Err (mDa) | rdb   | N Rule | e    |
|----------------------------------------------------------------|-------|----------|-----------|----------------|-----------|-------|--------|------|
| C <sub>17</sub> H <sub>12</sub> Na <sub>1</sub> O <sub>5</sub> | 0.022 | 319.0577 | 0.54      | 0.52           | 0.17      | 11.50 | ok     | even |

# S9 IR spectrum of 2

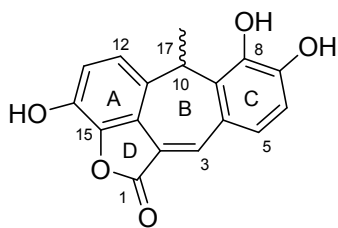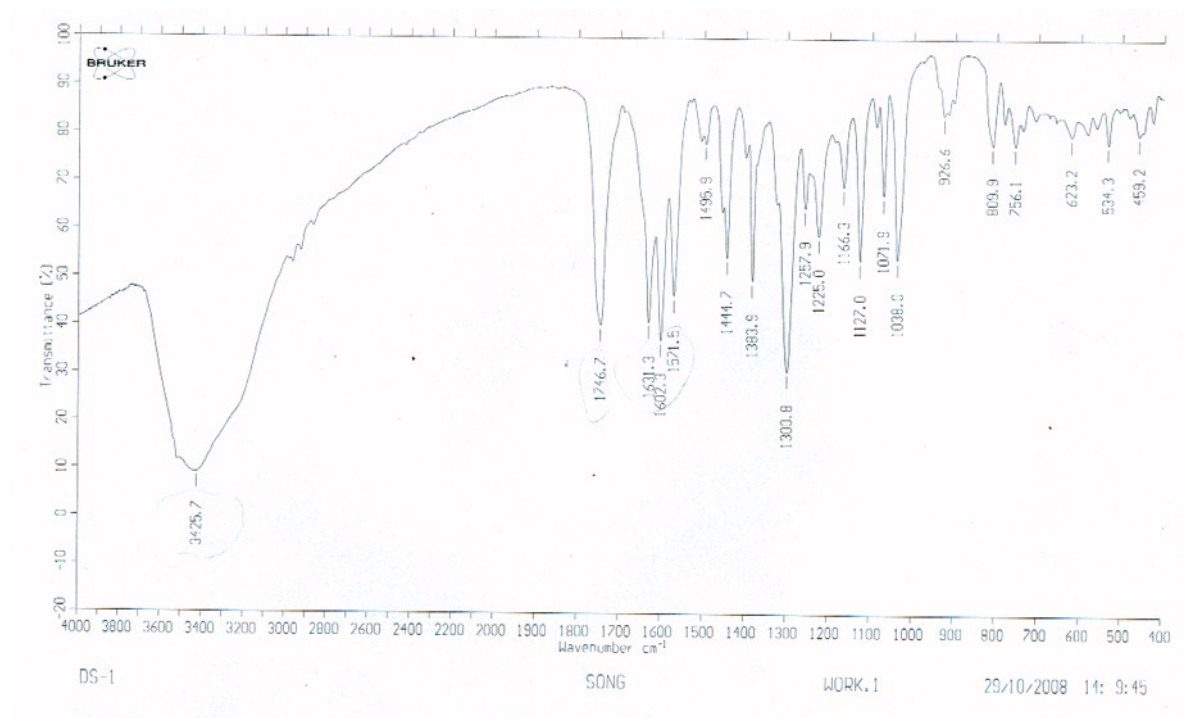

S10 <sup>1</sup>H NMR spectrum of 2 tested in CD<sub>3</sub>OD

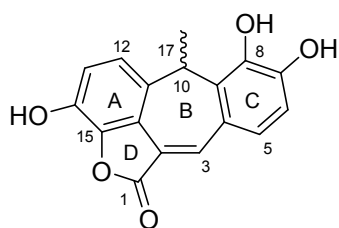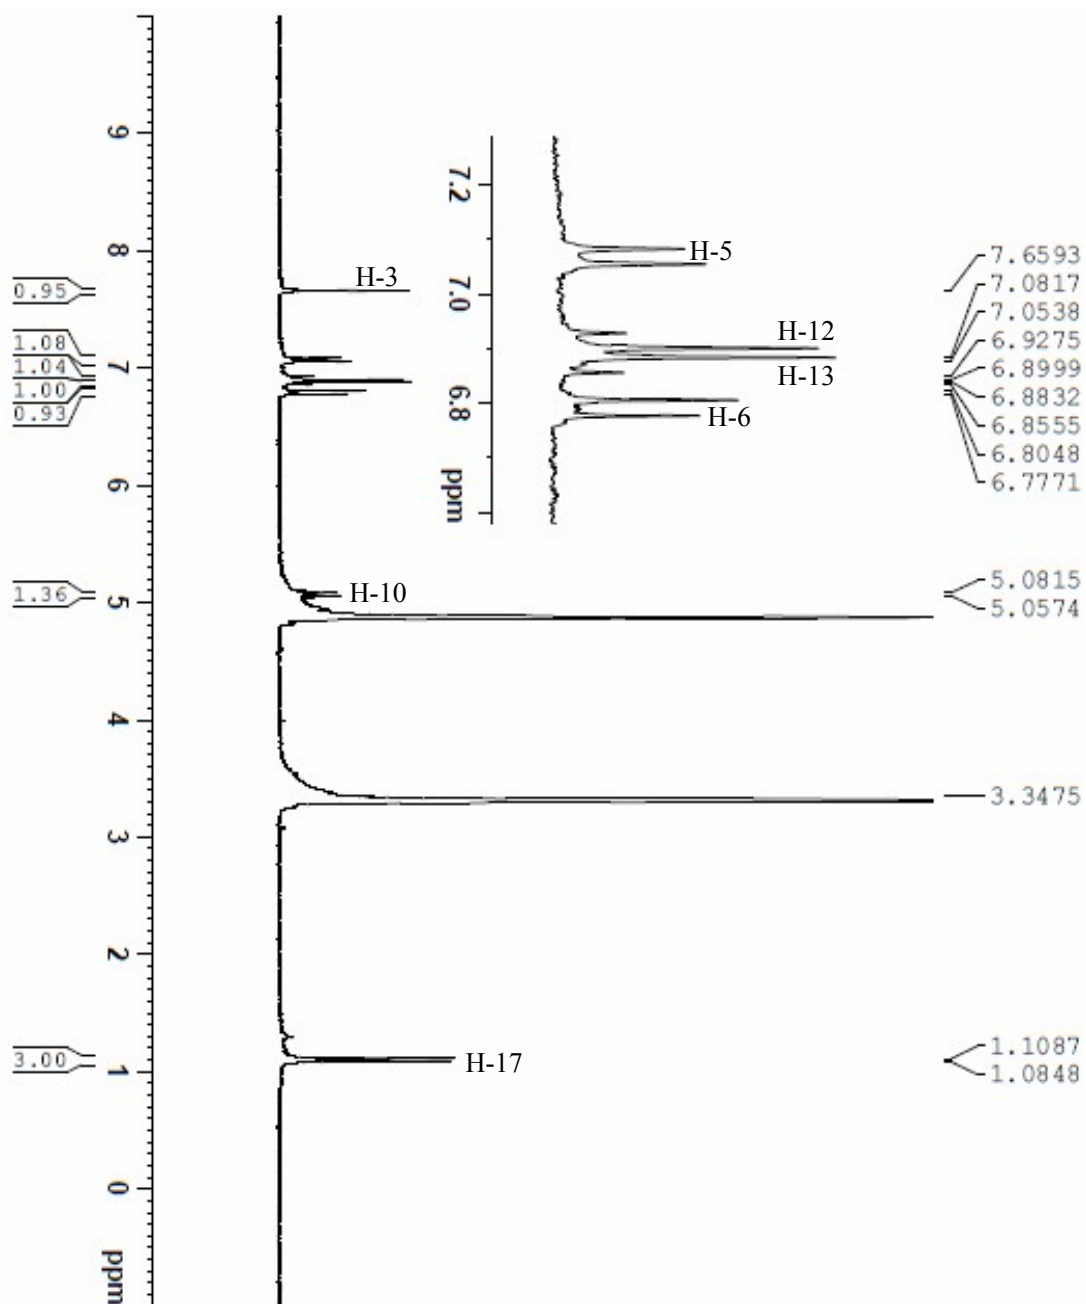

S11 <sup>13</sup>C NMR spectrum of 2 tested in CD<sub>3</sub>OD

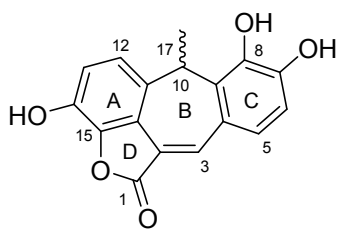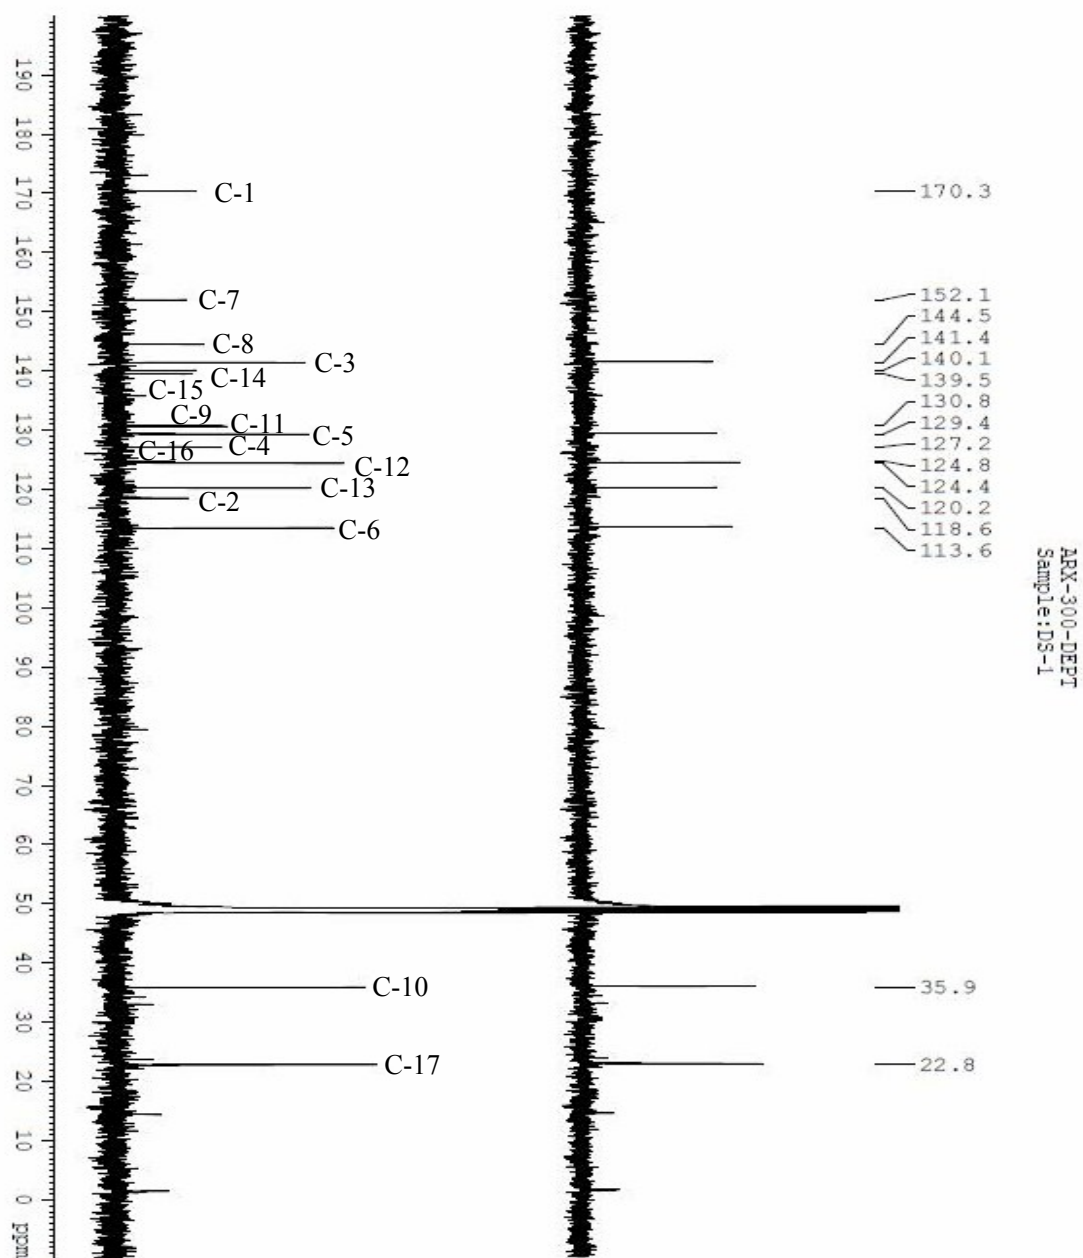

S12 HSQC spectrum of 2 tested in CD<sub>3</sub>OD

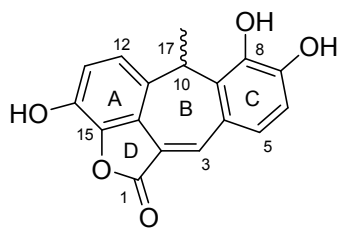

AV-600-HSQC  
Sample:DS-1

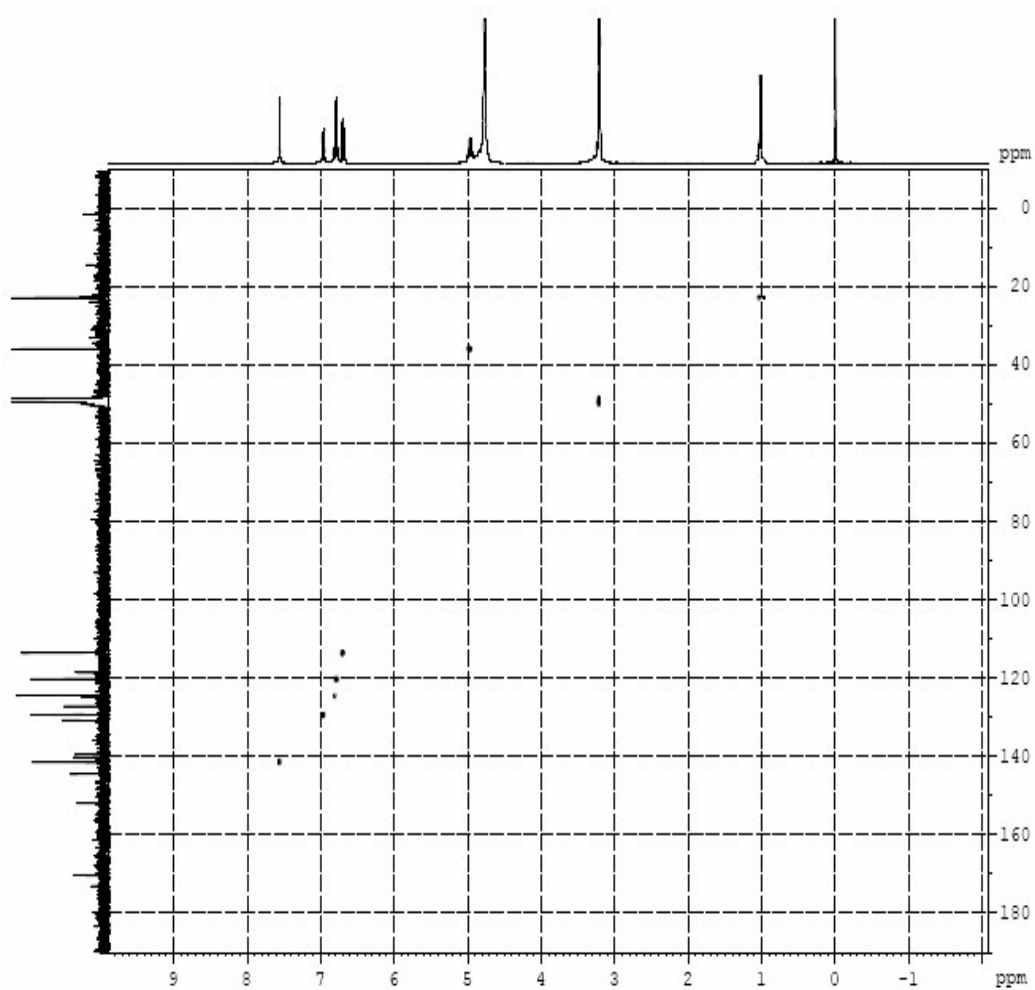

S13 HMBC spectrum of 2 tested in CD<sub>3</sub>OD

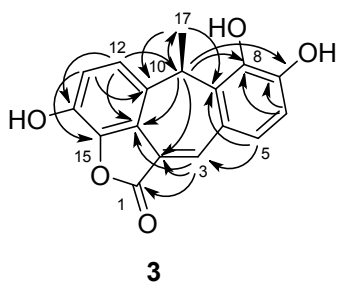

AV-600-HMBC  
Sample:DS-1

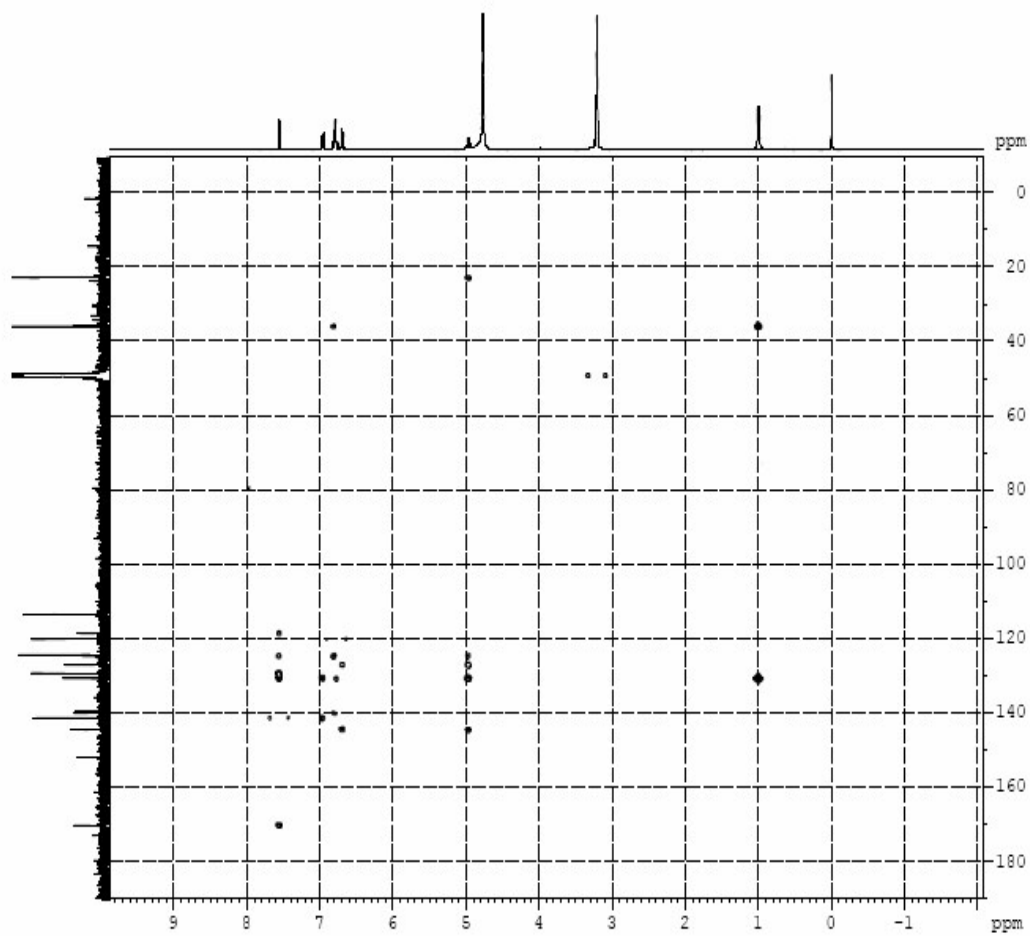



S14 NOESY spectrum of 2 tested in CD<sub>3</sub>OD



AV-600-NOESY  
Sample:DS-1

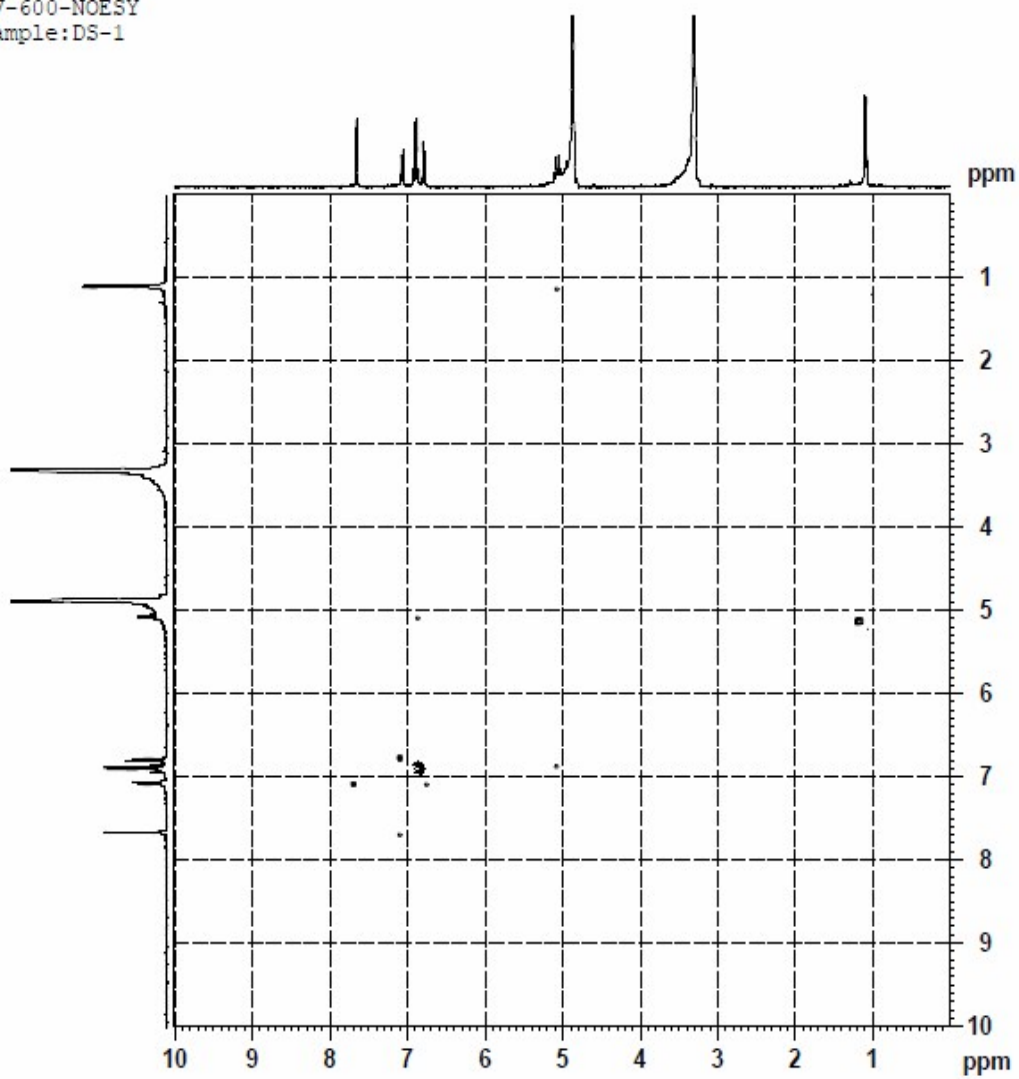

# S15 HRESIMS spectrum of 3

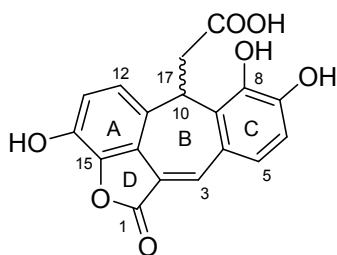

## Compound Mass Spectrum List Report

### Analysis Info

Analysis Name H:\ds\DS-17\_XIN.d  
 Method tune\_low.m  
 Sample Name DUI  
 Comment

Acquisition Date 2008-10-26 15:06:31

Operator Bruker Customer  
 Instrument / Ser# micrOTOF-Q 125

### Acquisition Parameter

|             |          |                       |          |                  |           |
|-------------|----------|-----------------------|----------|------------------|-----------|
| Source Type | ESI      | Ion Polarity          | Positive | Set Nebulizer    | 0.4 Bar   |
| Focus       | Active   | Set Capillary         | 4500 V   | Set Dry Heater   | 190 度     |
| Scan Begin  | 50 m/z   | Set End Plate Offset  | +500 V   | Set Dry Gas      | 4.0 l/min |
| Scan End    | 3000 m/z | Set Collision Cell RF | 90.0 Vpp | Set Divert Valve | Source    |

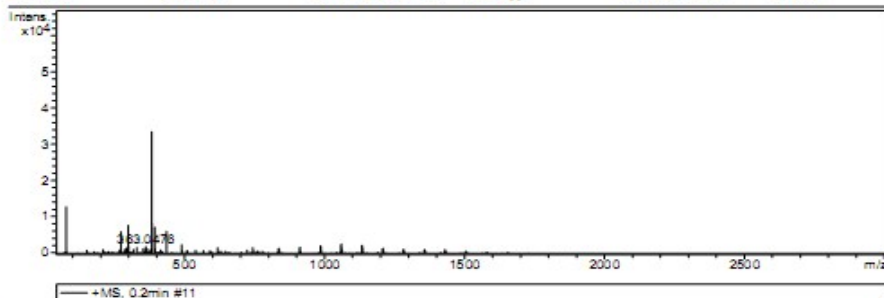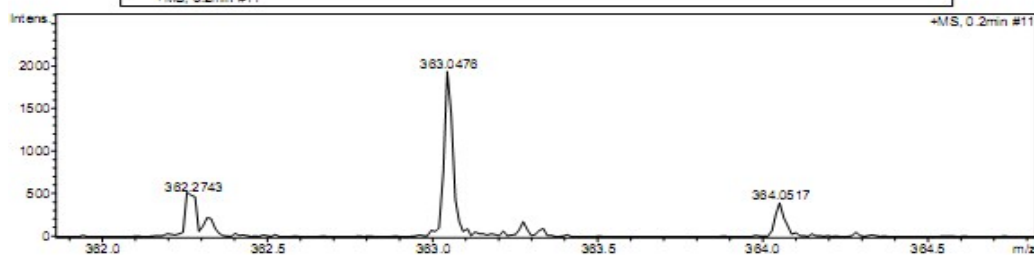

| # | m/z      | I    |
|---|----------|------|
| 1 | 362.2743 | 483  |
| 2 | 383.0478 | 1938 |
| 3 | 384.0517 | 391  |

| Sum Formula                                                    | Sigma | m/z      | Err [ppm] | Mean Err [ppm] | Err [mDa] | rdb   | N Rule | e    |
|----------------------------------------------------------------|-------|----------|-----------|----------------|-----------|-------|--------|------|
| C <sub>18</sub> H <sub>12</sub> Na <sub>1</sub> O <sub>7</sub> | 0.019 | 383.0475 | -0.25     | -0.57          | -0.09     | 12.50 | ok     | even |

# S16 IR spectrum of 3 tested in CD<sub>3</sub>OD

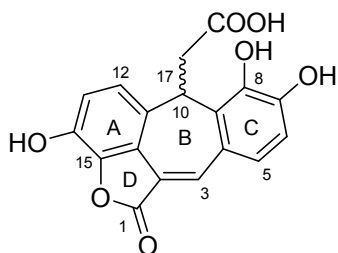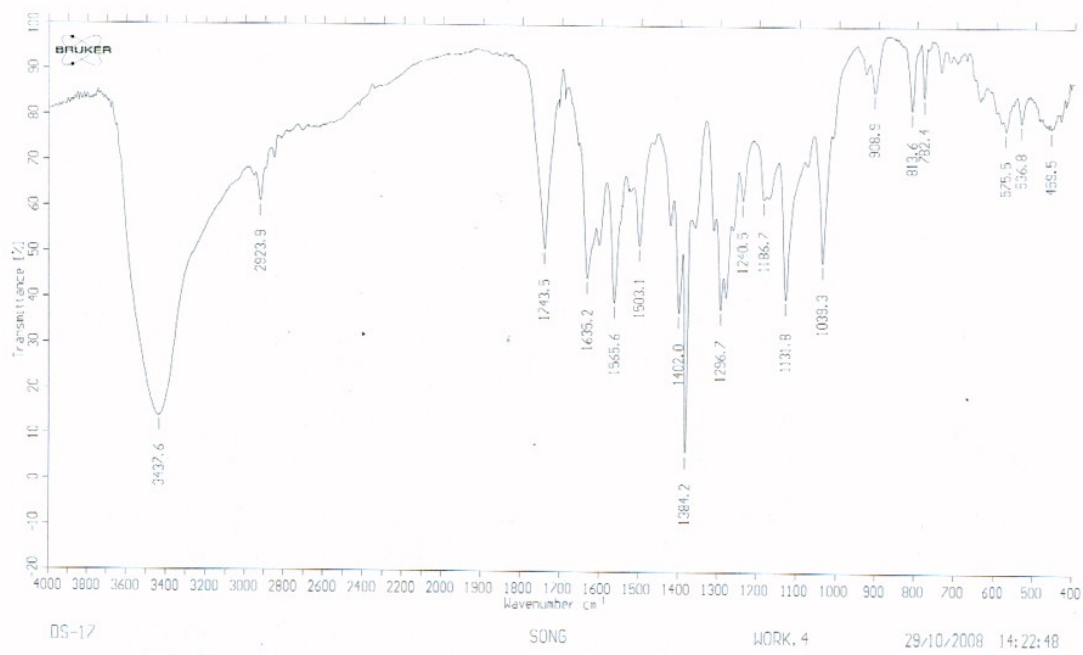

S17  $^1\text{H}$  NMR spectrum of 3 tested in  $\text{CD}_3\text{OD}$

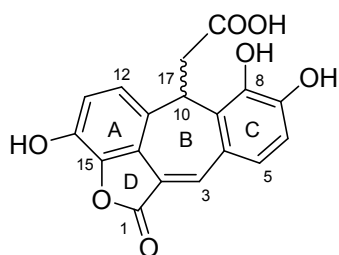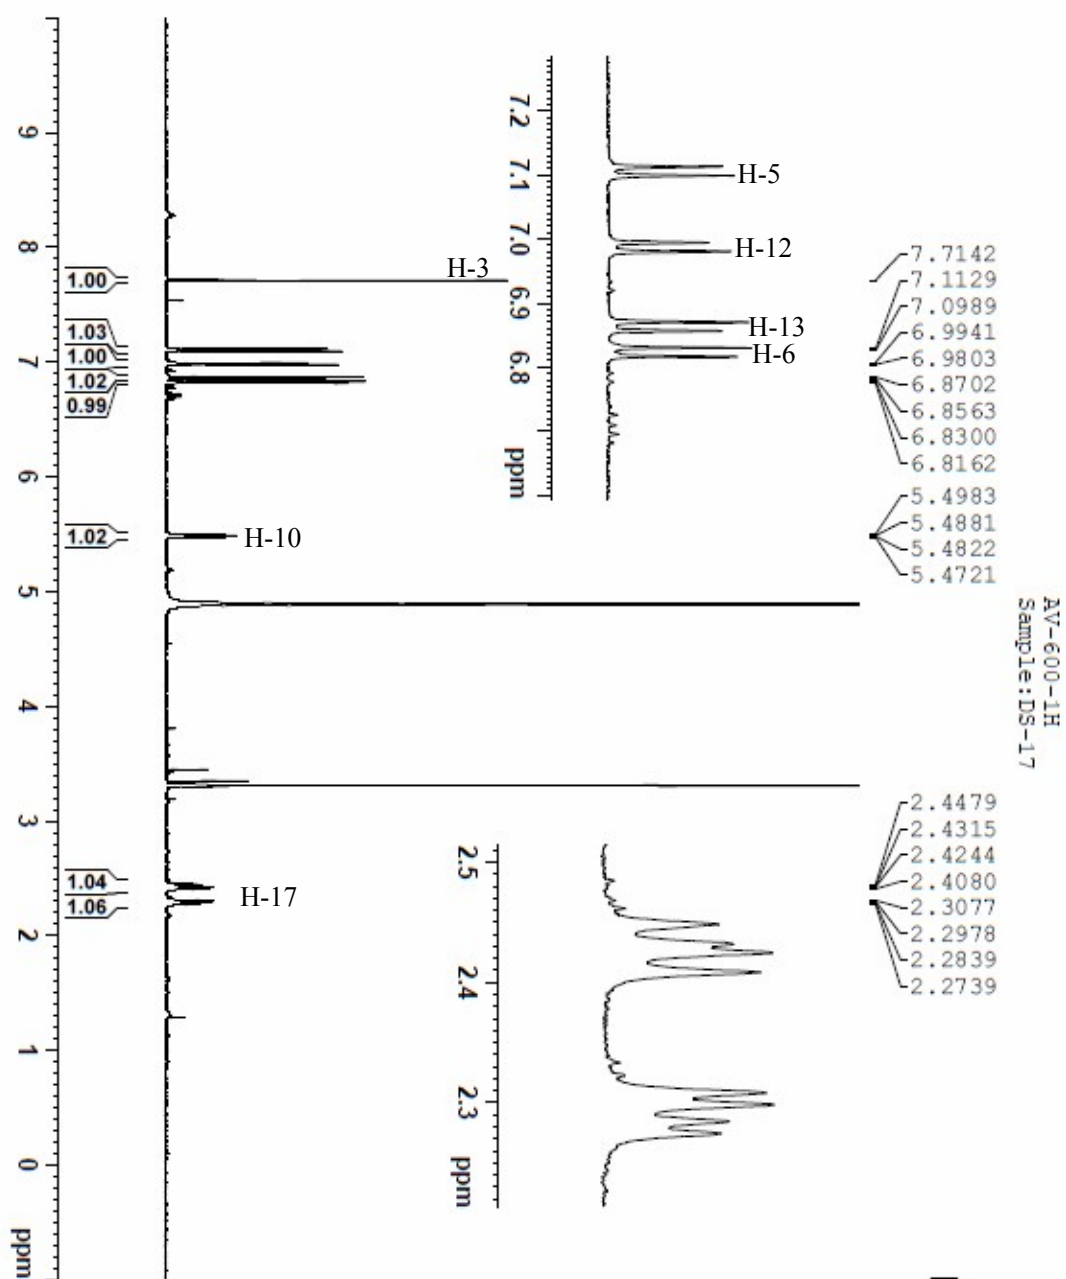

S18  $^{13}\text{C}$  NMR spectrum of 3 tested in  $\text{CD}_3\text{OD}$

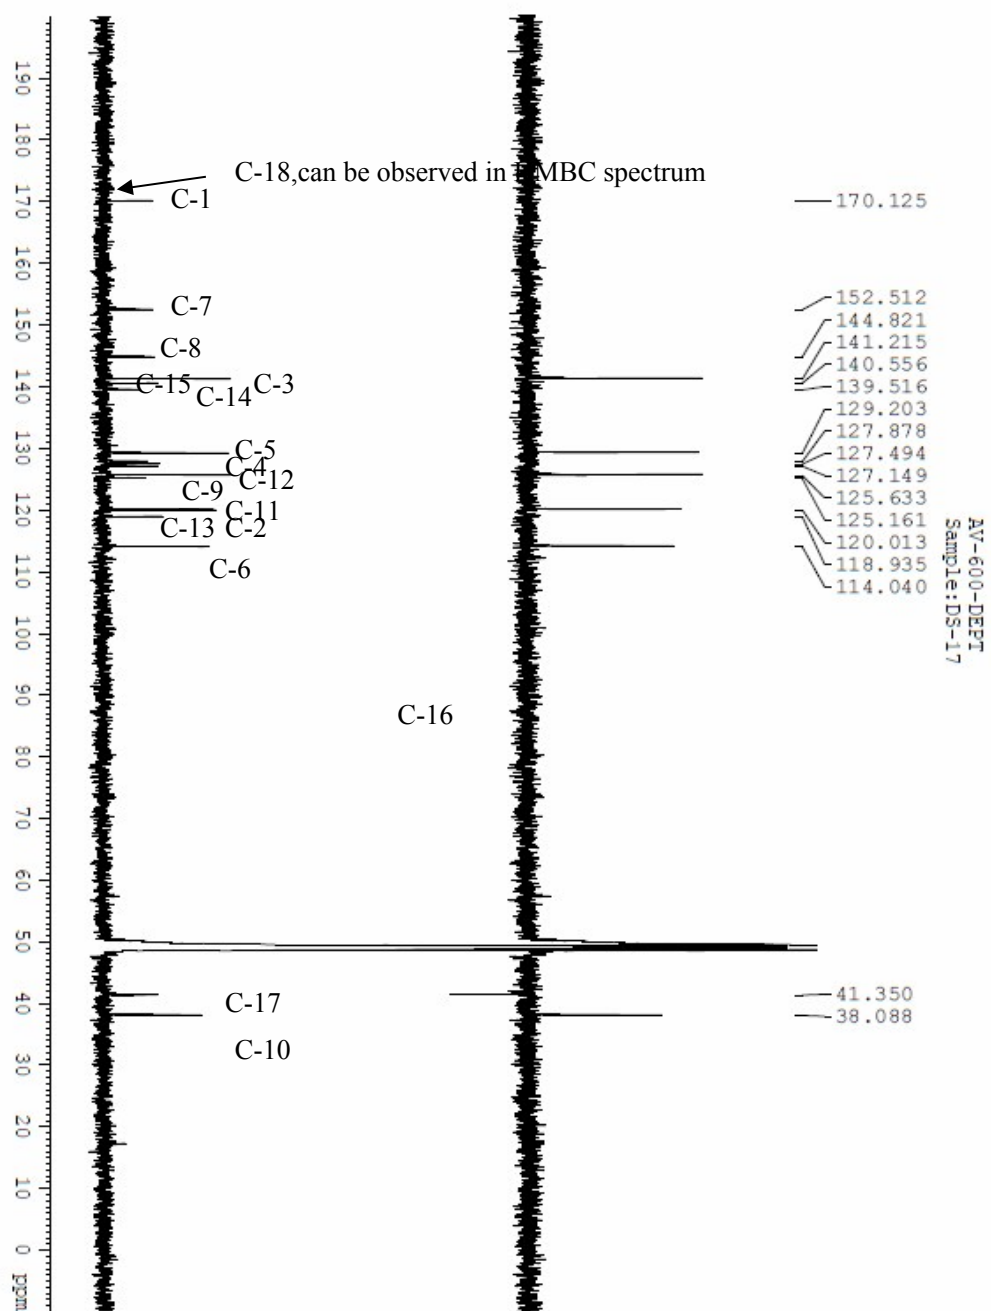

S 19 HSQC spectrum of 3 tested in CD<sub>3</sub>OD

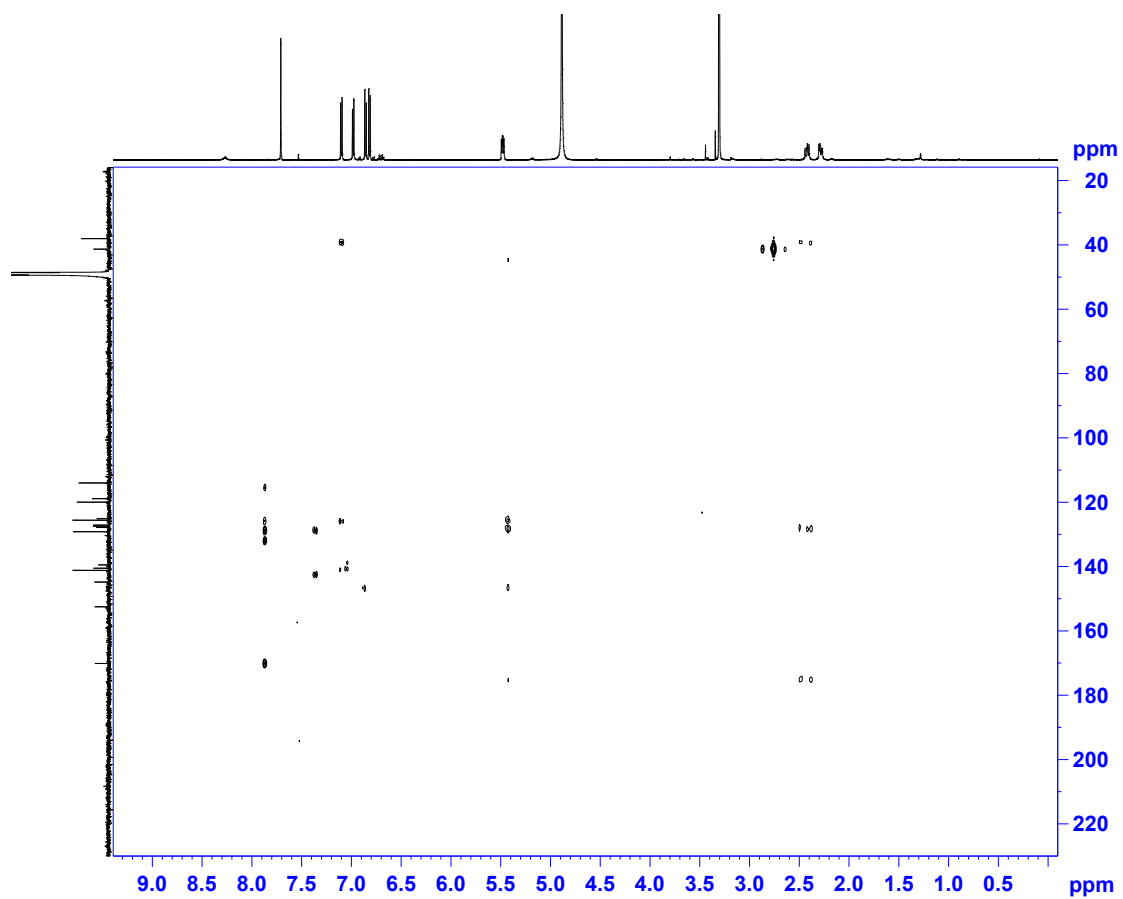

S20 HMBC spectrum of 3 tested in CD<sub>3</sub>OD

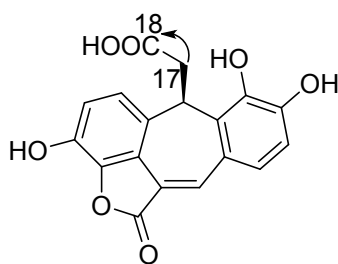

4

AV-600-HMBC  
Sample:DS-17

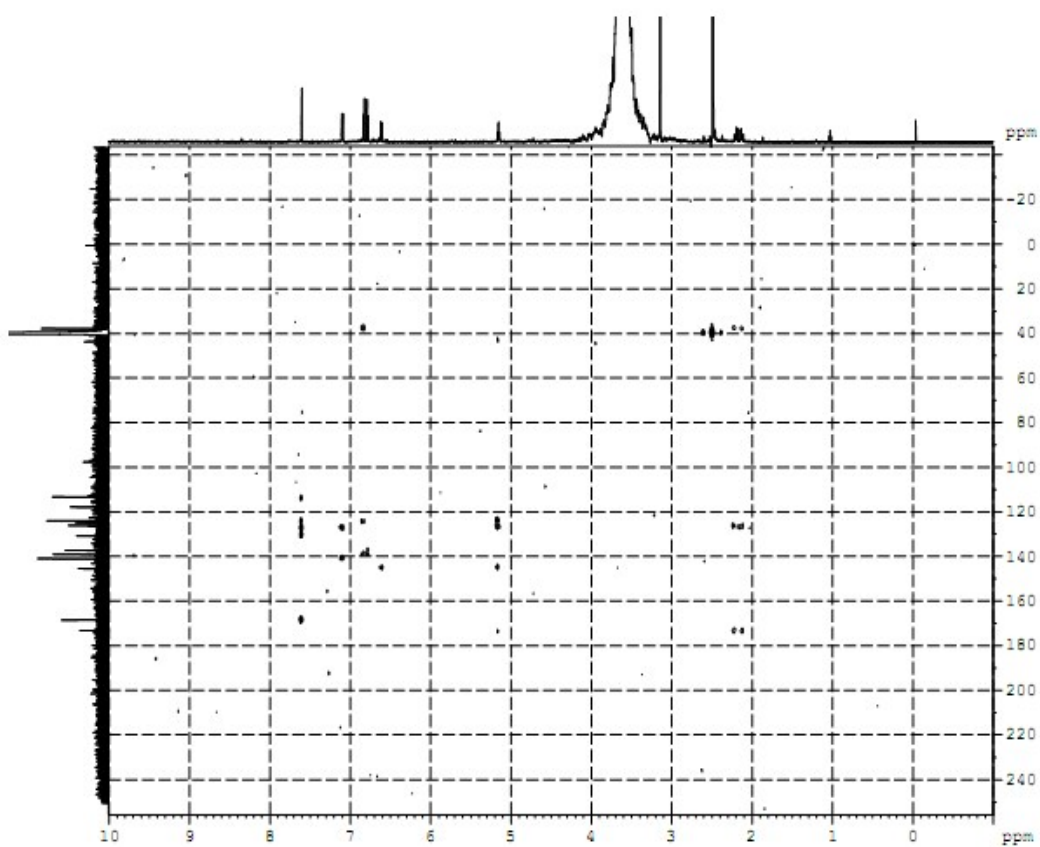

### S21 NOESY spectrum of 3 tested in CD<sub>3</sub>OD

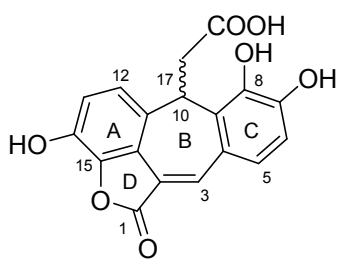

AV-600-NOESY  
Sample: DS-17

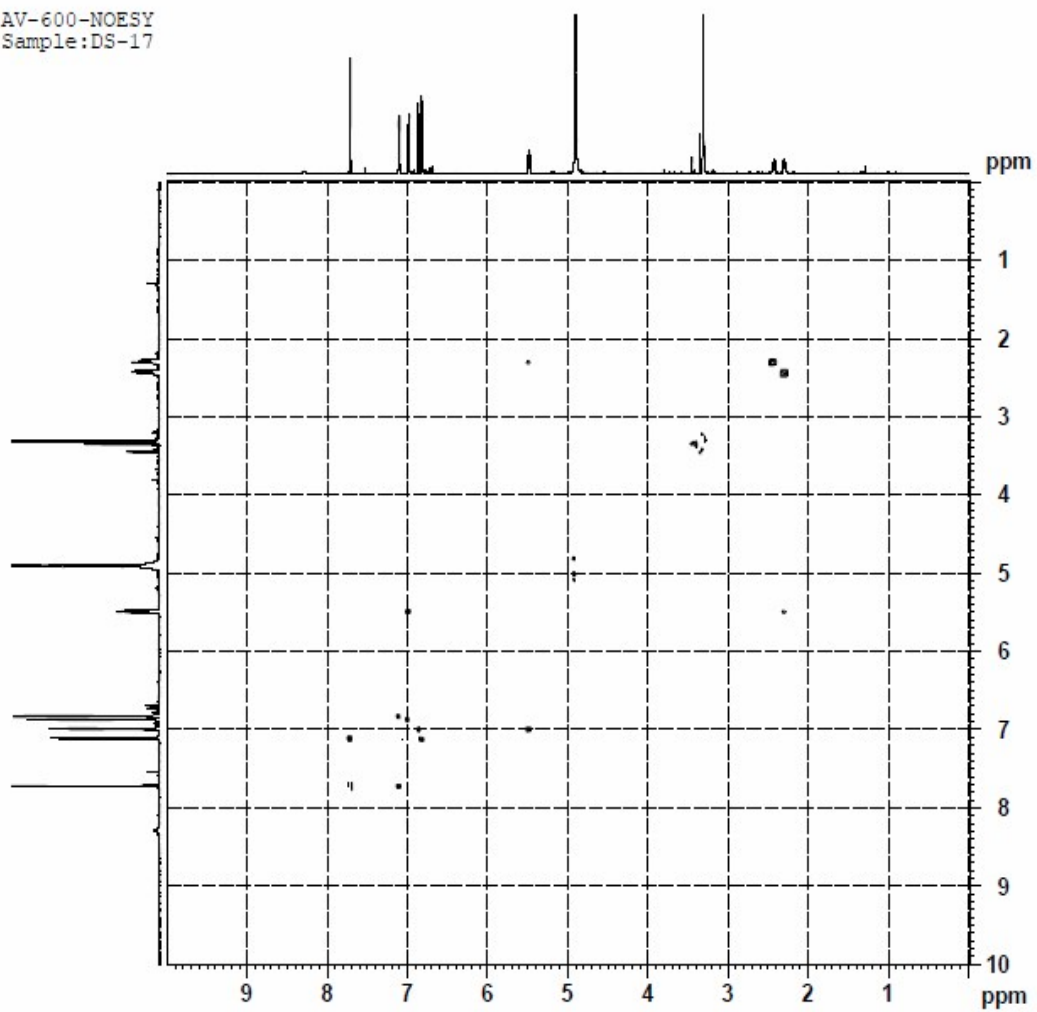



## S22 HRESIMS spectrum of 4

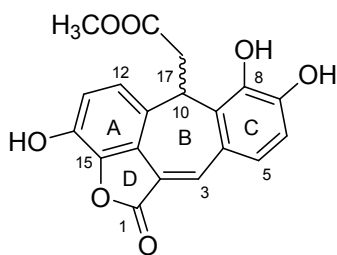

### Compound Mass Spectrum List Report

#### Analysis Info

Analysis Name H:\ds\DS-6 XIN.d  
Method tune\_low.m  
Sample Name DUI  
Comment

Acquisition Date 2008-10-26 15:03:52

Operator Bruker Customer  
Instrument / Ser# micrOTOF-Q 125

#### Acquisition Parameter

|             |          |                       |           |                  |           |
|-------------|----------|-----------------------|-----------|------------------|-----------|
| Source Type | ESI      | Ion Polarity          | Positive  | Set Nebulizer    | 0.4 Bar   |
| Focus       | Active   | Set Capillary         | 4500 V    | Set Dry Heater   | 190 °C    |
| Scan Begin  | 50 m/z   | Set End Plate Offset  | +500 V    | Set Dry Gas      | 4.0 l/min |
| Scan End    | 3000 m/z | Set Collision Cell RF | 200.0 Vpp | Set Divert Valve | Source    |

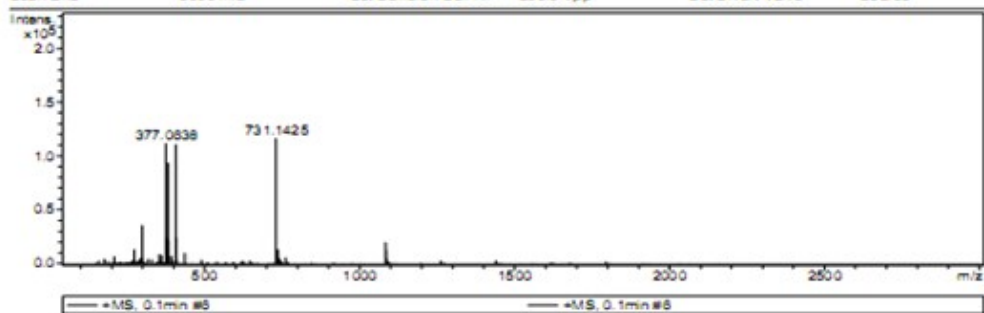

# S23 IR spectrum of 4

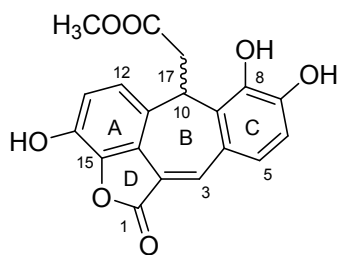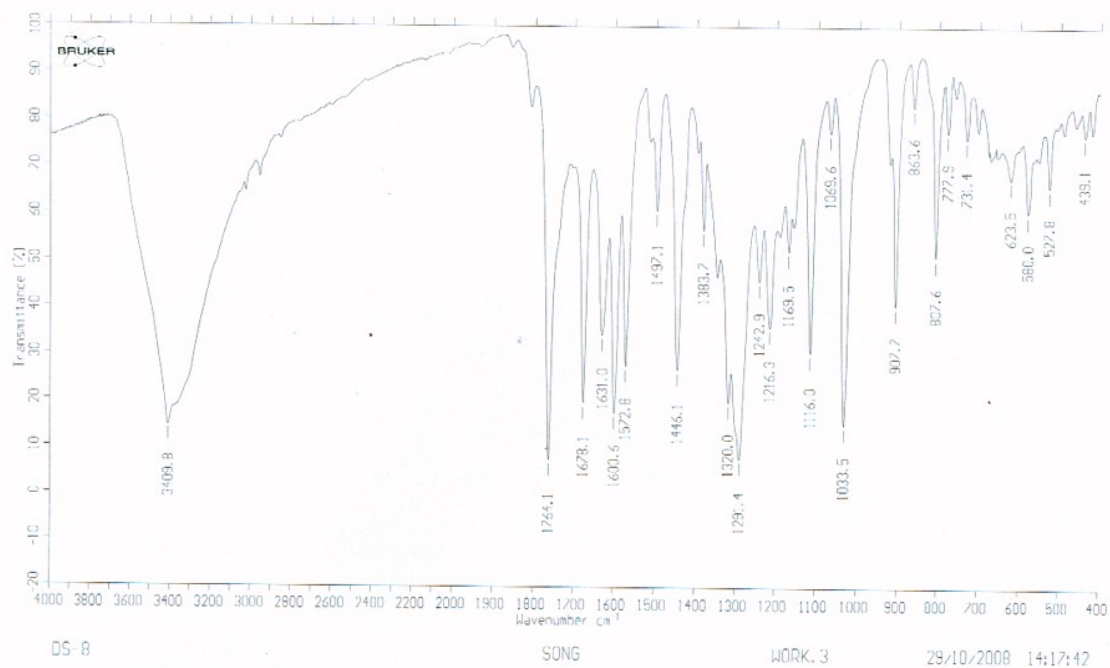

# S24 <sup>1</sup>H NMR spectrum of 4 tested in DMSO-d6



AV-600-1H  
Sample:

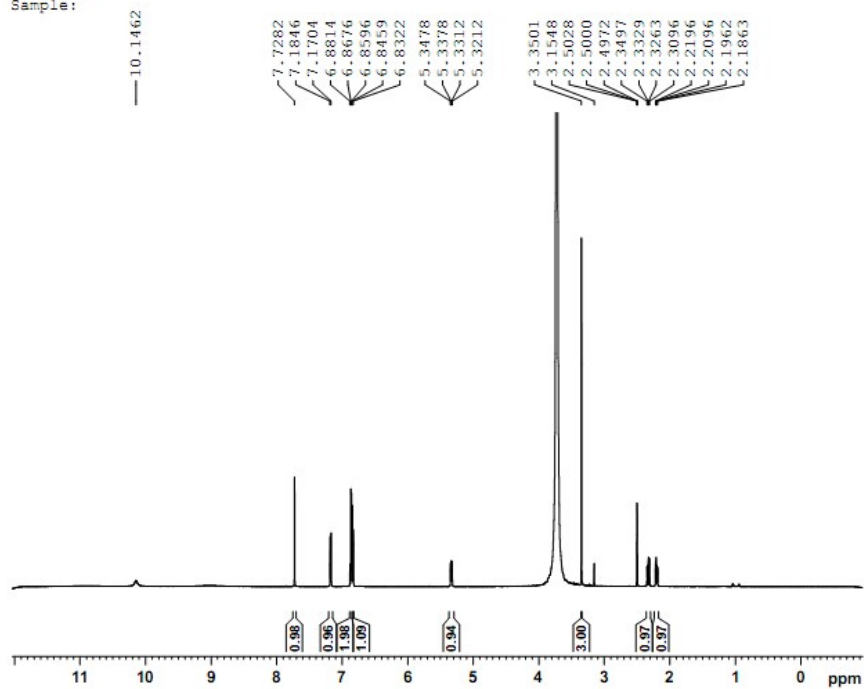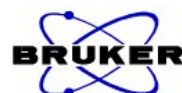

```

NAME          06-0
EXPNO         1
PROCNO        1
Date_         20080111
Time          13.28
INSTRUM       spect
PROBHD        5 mm BBOBO 90
PULPROG       zg30
PC            65536
SOLVENT       DMSO
DS            4
DE            2
SWH           7788.162 Hz
FIDRES        0.118838 Hz
AQ            4.207553 sec
RG            25.4
SD            64.000 usec
LR            6.50 usec
GB            296.4 K
SI            1.00000000 sec
DDO           1

----- CHANNEL f1 -----
NUC1          1H
P1            11.00 usec
PL1           -4.00 dB
PULSEW       34.70265579 W
SFO1          600.132296 MHz
SI            32768
SF            600.1300013 MHz
WDW           EM
SSB           0
GB           0.50 Hz
PC            1.00
    
```

S25 <sup>13</sup>C NMR spectrum of 4 tested in DMSO-d6

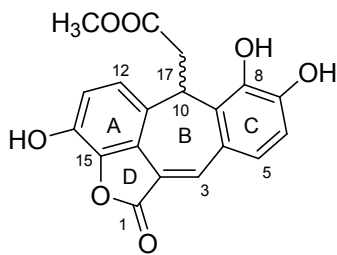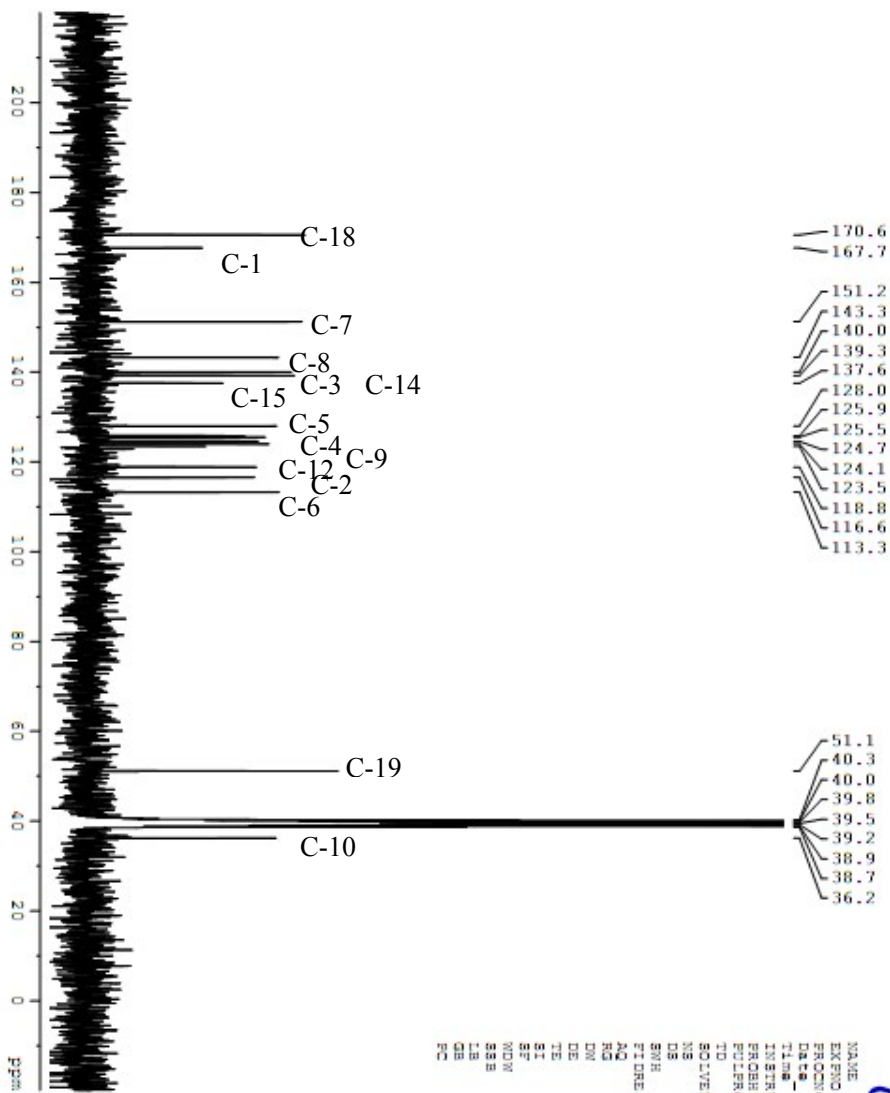

ARX-300  
Sample: DS-8

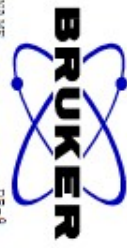

```

NAME          DS-8
EXPNO         2
PROCNO       1
DATE_        20090103
TIME         9.28
INSTRUM      spect
PROBHD       5 mm QNP 1H
PULPROG      zgpg30
TD           65536
SOLVENT      DMSO
NS           192
DS           4
SWH          24727.773 Hz
FIDRES       1.297163 Hz
AQ           0.2604980 sec
RG           24800
DE           24.000 usec
TE           31.43 usec
SI           2.7 K
SF           75.483125 MHz
WDW          EM
SSB          0
LB           3.00 Hz
GB           0
PC           1.00
    
```

# S26 HSQC spectrum of 4 tested in DMSO-d6

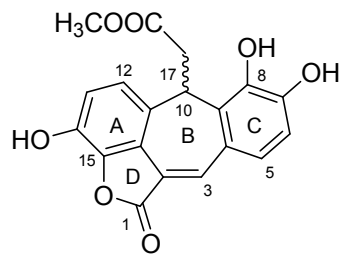

AV-600-HSQC  
Sample: DS-8

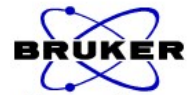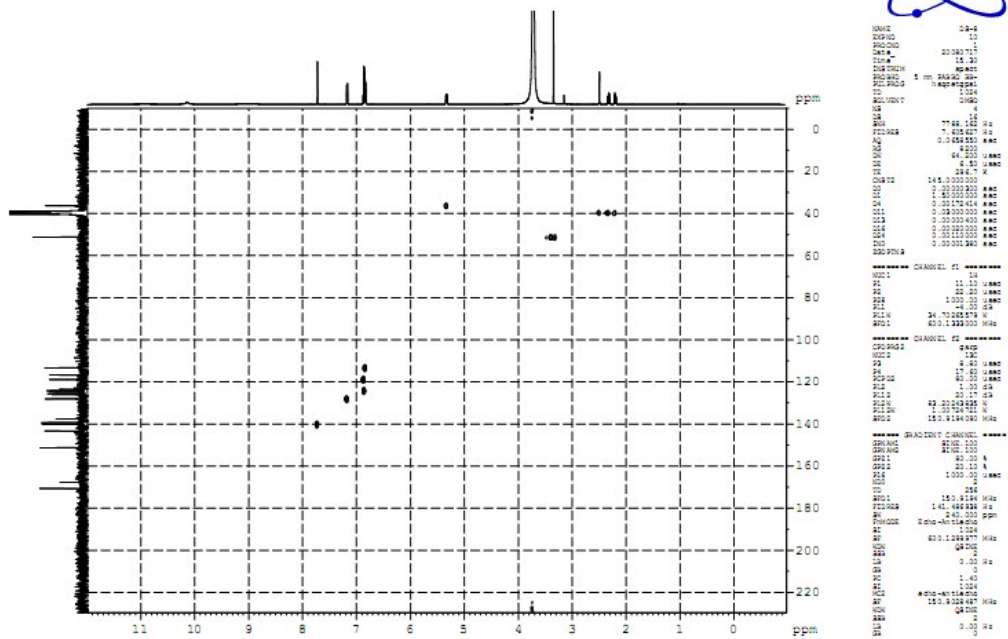

# S27 HMBC spectrum of 4 tested in DMSO-d6

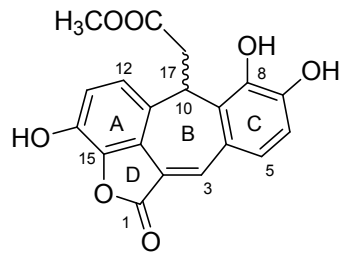

AV-600-HMBC  
Sample: DS-8

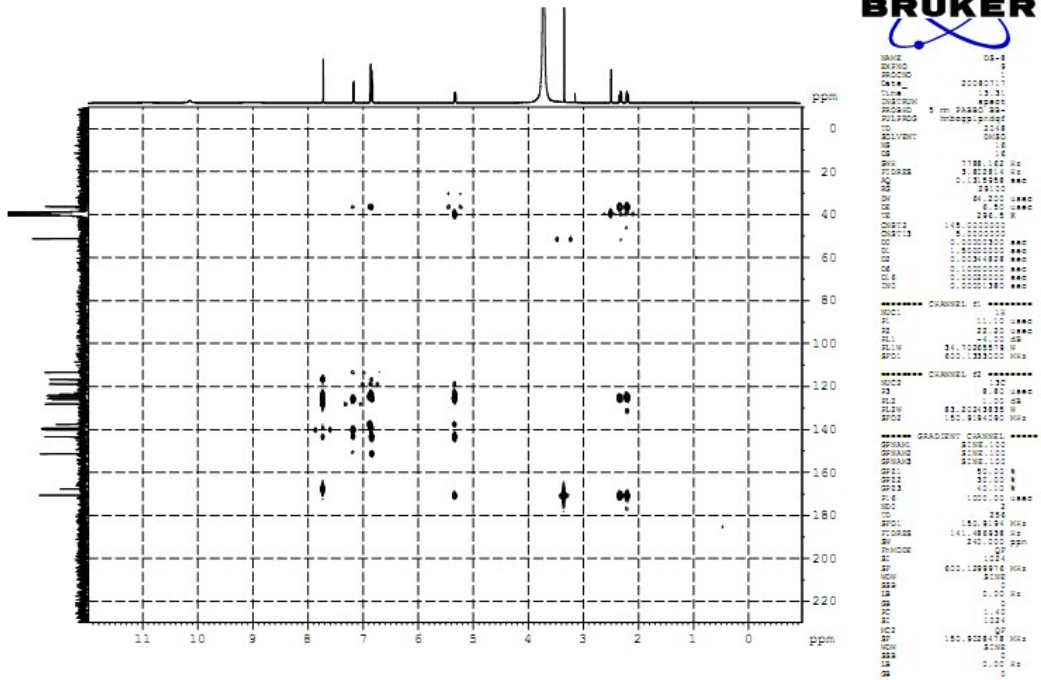

S28 NOESY spectrum of 4 tested in DMSO-d6

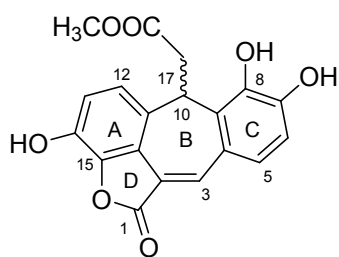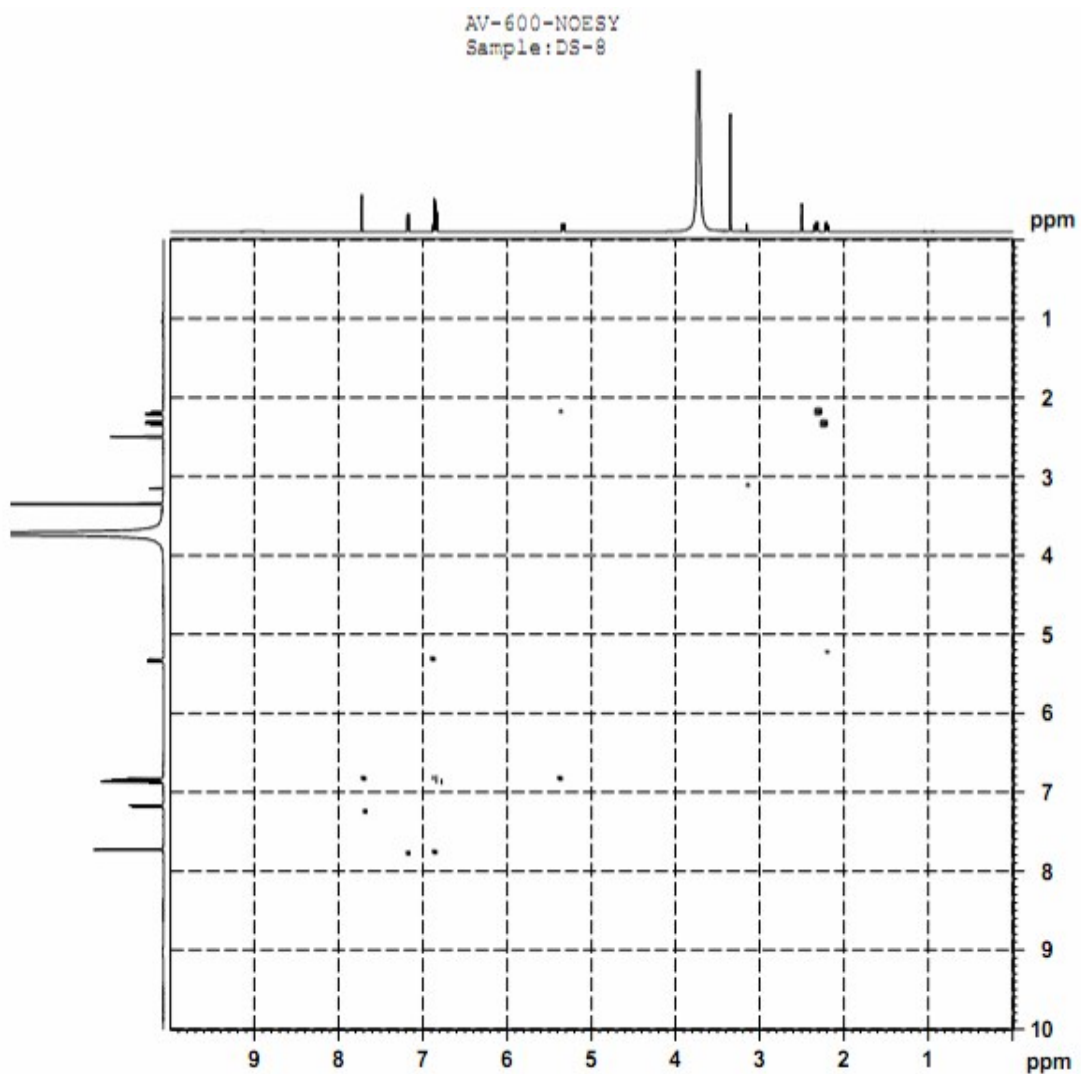

## S29 HRESIMS spectrum of 5

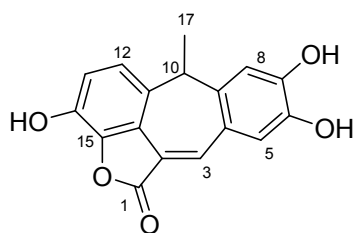

### Mass Spectrum Molecular Formula Report

#### Analysis Info

Analysis Name D:\Data\20110426\dsg-3.d  
 Method tune\_50-1000\_POS\_20110328.m  
 Sample Name nafa-2  
 Comment

Acquisition Date 4/26/2011 11:38:49 AM

Operator Bruker Customer  
 Instrument / Ser# micrOTOF-Q 125

#### Acquisition Parameter

|             |            |                       |           |                  |           |
|-------------|------------|-----------------------|-----------|------------------|-----------|
| Source Type | ESI        | Ion Polarity          | Positive  | Set Nebulizer    | 0.5 Bar   |
| Focus       | Not active | Set Capillary         | 4500 V    | Set Dry Heater   | 180 °C    |
| Scan Begin  | 50 m/z     | Set End Plate Offset  | -500 V    | Set Dry Gas      | 4.0 l/min |
| Scan End    | 3000 m/z   | Set Collision Cell RF | 250.0 Vpp | Set Divert Valve | Source    |

#### Generate Molecular Formula Parameter

|                  |          |                        |       |         |   |
|------------------|----------|------------------------|-------|---------|---|
| Formula, min.    | C17H12O5 |                        |       |         |   |
| Formula, max.    |          |                        |       |         |   |
| Measured m/z     | 297.075  | Tolerance              | 4 mDa | Charge  | 1 |
| Check Valence    | no       | Minimum                | 0     | Maximum | 0 |
| Nitrogen Rule    | no       | Electron Configuration | both  |         |   |
| Filter H/C Ratio | no       | Minimum                | 0     | Maximum | 3 |
| Estimate Carbon  | yes      |                        |       |         |   |

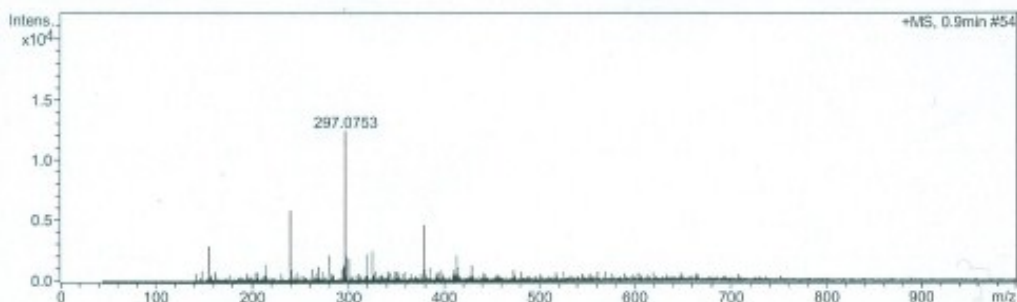

| # | m/z      | I     |
|---|----------|-------|
| 1 | 297.0753 | 12430 |

  

| Sum Formula   | Sigma | m/z      | Err [ppm] | Mean Err [ppm] | Err [mDa] | rdb   | N Rule | e <sup>-</sup> |
|---------------|-------|----------|-----------|----------------|-----------|-------|--------|----------------|
| C 17 H 13 O 5 | 0.013 | 297.0757 | 1.67      | 1.48           | 0.50      | 11.50 | ok     | even           |



### S30 <sup>1</sup>H NMR spectrum of 5 tested in MeOD

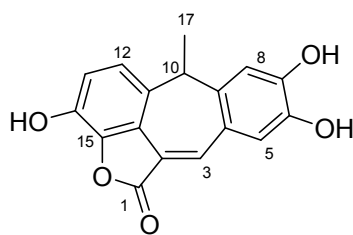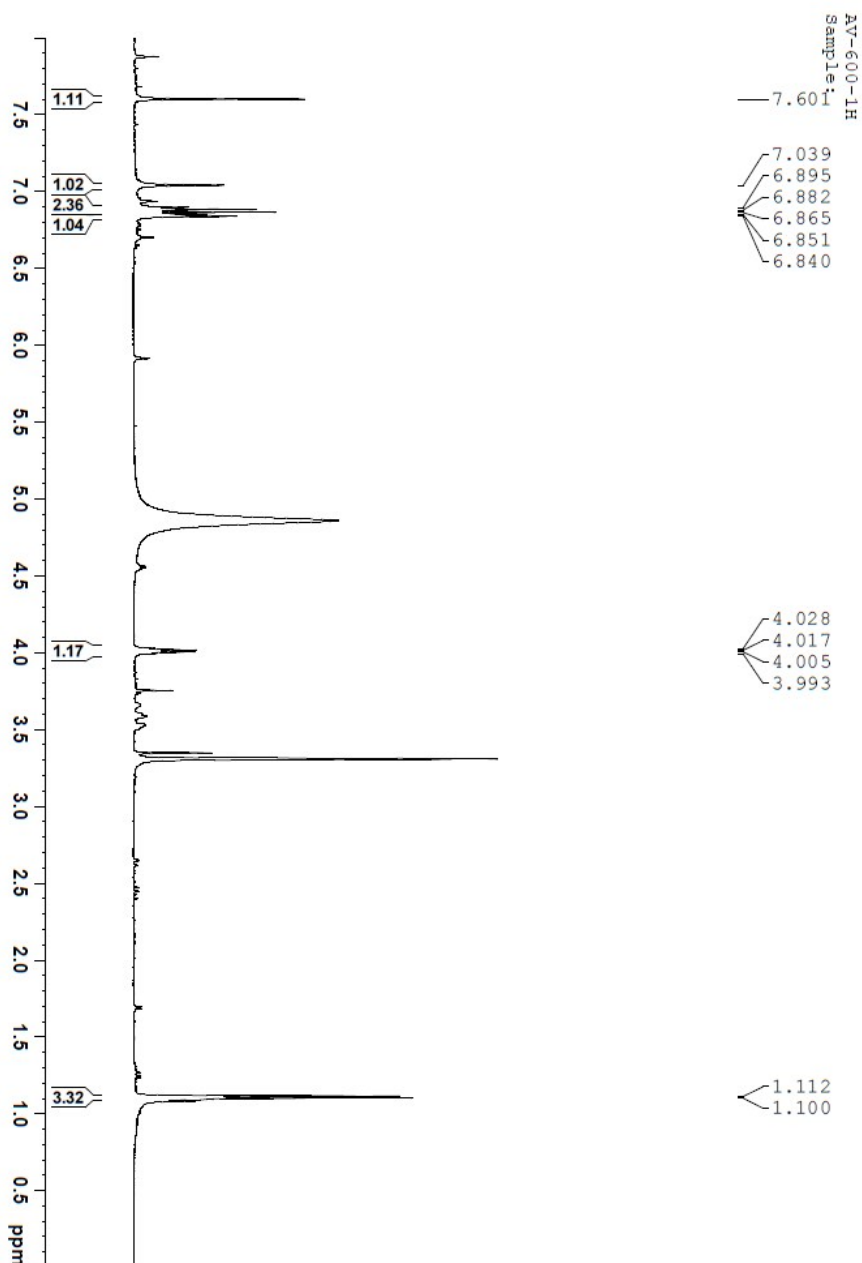

S31  $^{13}\text{C}$  NMR spectrum of 5 in MeOD

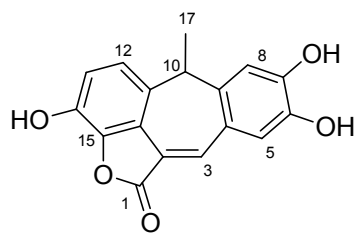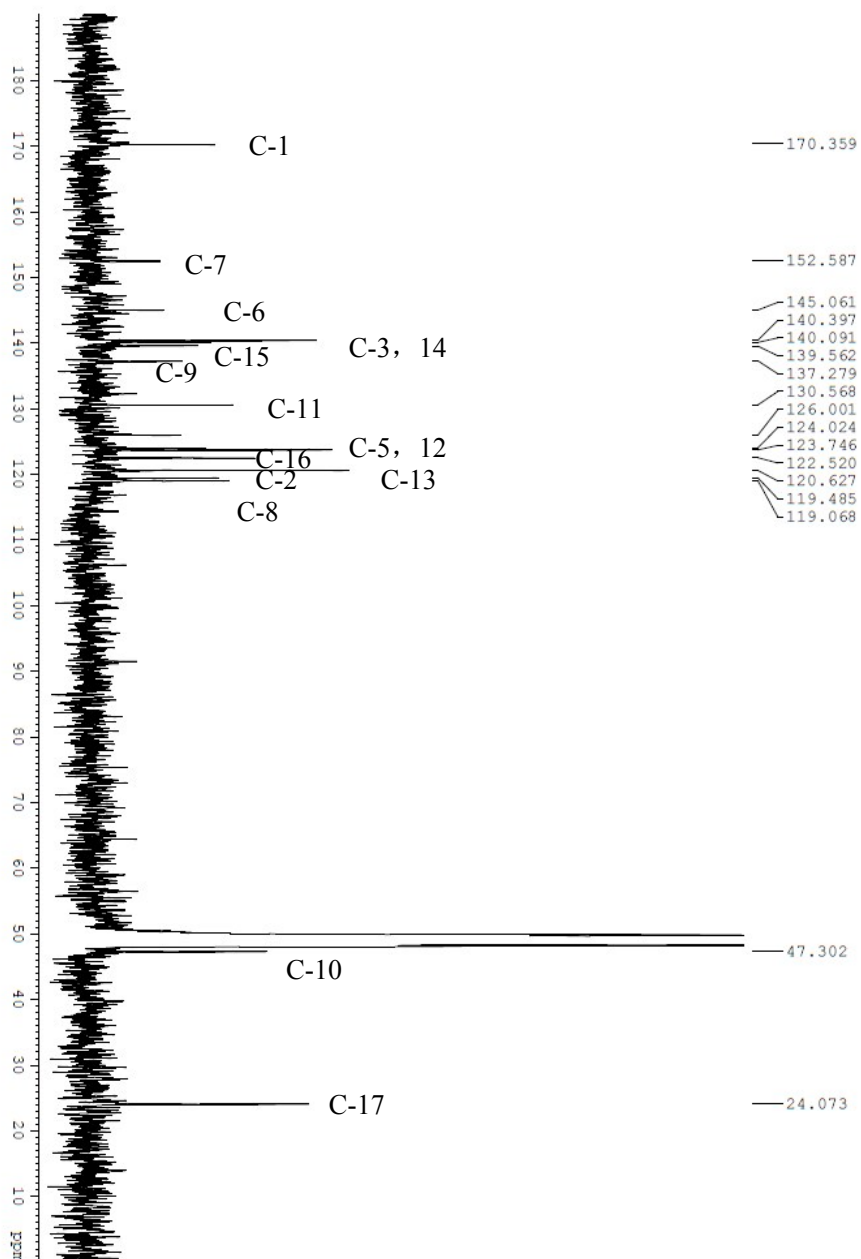

### S32 HMBC spectrum of 5 tested in DMSO-D6

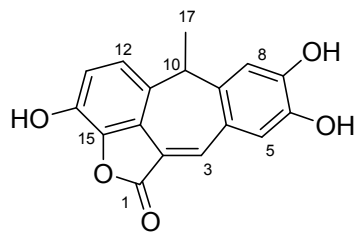

AV-600-HMBC  
Sample:

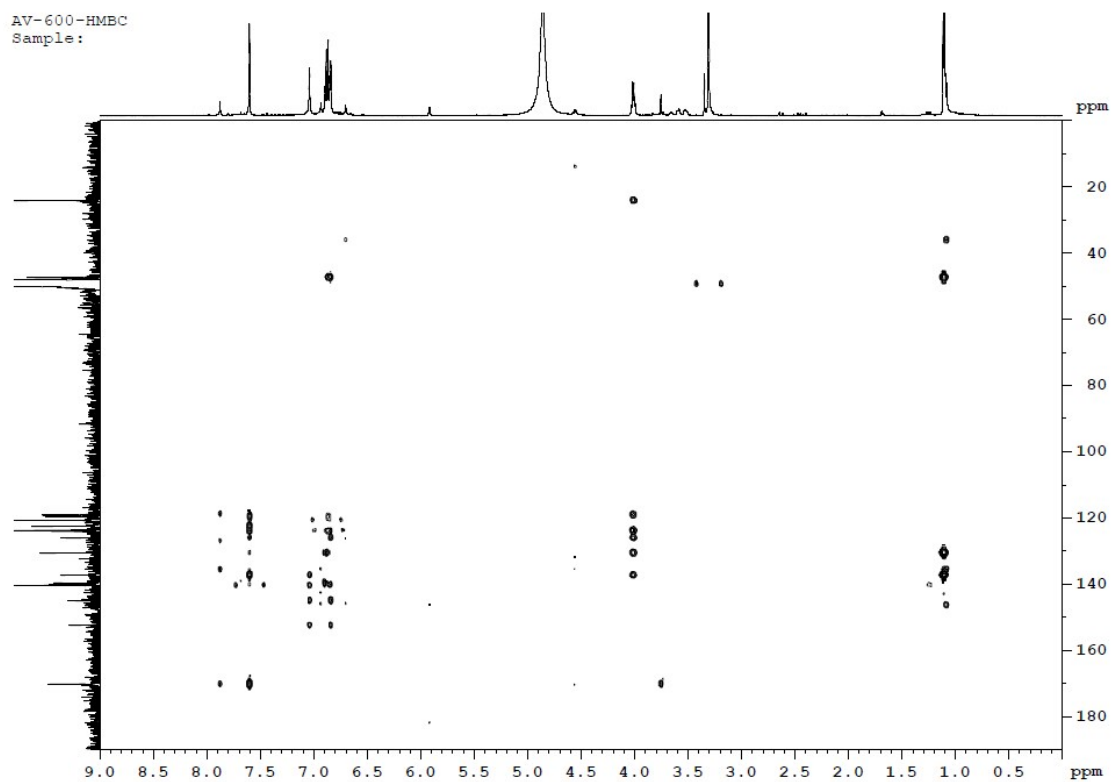

### S33 Single-crystal X-ray data of 1

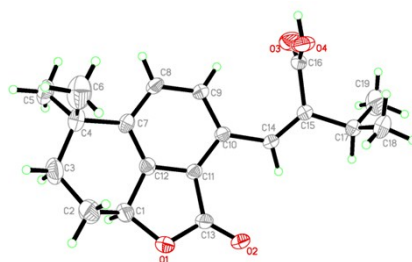

1

Table 1. Crystal data and structure refinement for shelxl.

|                                 |                                                |                  |
|---------------------------------|------------------------------------------------|------------------|
| Identification code             | shelxl                                         |                  |
| Empirical formula               | C <sub>19</sub> H <sub>22</sub> O <sub>4</sub> |                  |
| Formula weight                  | 314.37                                         |                  |
| Temperature                     | 293(2) K                                       |                  |
| Wavelength                      | 0.71073 Å                                      |                  |
| Crystal system, space group     | triclinic, P-1                                 |                  |
| Unit cell dimensions            | a = 8.424(5) Å                                 | alpha = 71.63(2) |
| deg.                            | b = 9.093(7) Å                                 | beta = 89.35(2)  |
| deg.                            | c = 12.323(7) Å                                | gamma = 74.44(3) |
| deg.                            |                                                |                  |
| Volume                          | 860.1(9) Å <sup>3</sup>                        |                  |
| Z, Calculated density           | 2, 1.214 Mg/m <sup>3</sup>                     |                  |
| Absorption coefficient          | 0.084 mm <sup>-1</sup>                         |                  |
| F(000)                          | 336                                            |                  |
| Crystal size                    | 0.14 x 0.13 x 0.13 mm                          |                  |
| Theta range for data collection | 3.15 to 27.48 deg.                             |                  |
| Limiting indices                | -10<=h<=9, -11<=k<=11, -15<=l<=15              |                  |
| Reflections collected / unique  | 8499 / 3891 [R(int) = 0.0220]                  |                  |
| Completeness to theta = 27.48   | 98.8 %                                         |                  |
| Max. and min. transmission      | 0.9895 and 0.9883                              |                  |
| Refinement method               | Full-matrix least-squares on F <sup>2</sup>    |                  |
| Data / restraints / parameters  | 3891 / 0 / 213                                 |                  |

|                                      |                                       |
|--------------------------------------|---------------------------------------|
| Goodness-of-fit on $F^2$             | 1.118                                 |
| Final R indices [ $I > 2\sigma(I)$ ] | R1 = 0.0458, wR2 = 0.1268             |
| R indices (all data)                 | R1 = 0.0641, wR2 = 0.1355             |
| Largest diff. peak and hole          | 0.221 and -0.150 e. $\text{\AA}^{-3}$ |

Table 2. Atomic coordinates ( $\times 10^4$ ) and equivalent isotropic displacement parameters ( $\text{\AA}^2 \times 10^3$ ) for shelxl.

U(eq) is defined as one third of the trace of the orthogonalized Uij tensor.

|       | x       | y        | z       | U(eq)  |
|-------|---------|----------|---------|--------|
| C(1)  | 2222(2) | 3226(2)  | 4136(1) | 56(1)  |
| C(2)  | 1860(3) | 4979(2)  | 3447(2) | 78(1)  |
| C(3)  | 2906(3) | 5028(2)  | 2418(2) | 77(1)  |
| C(4)  | 4817(2) | 4404(2)  | 2690(1) | 56(1)  |
| C(5)  | 5614(3) | 3942(3)  | 1686(1) | 75(1)  |
| C(6)  | 5461(4) | 5731(2)  | 2877(2) | 95(1)  |
| C(7)  | 5259(2) | 2981(2)  | 3797(1) | 43(1)  |
| C(8)  | 6859(2) | 2162(2)  | 4297(1) | 46(1)  |
| C(9)  | 7163(2) | 1104(2)  | 5413(1) | 45(1)  |
| C(10) | 5898(2) | 838(2)   | 6135(1) | 37(1)  |
| C(11) | 4300(2) | 1597(2)  | 5598(1) | 38(1)  |
| C(12) | 4022(2) | 2551(2)  | 4461(1) | 41(1)  |
| C(13) | 2667(2) | 1785(2)  | 6064(1) | 46(1)  |
| C(14) | 6120(2) | -75(2)   | 7363(1) | 41(1)  |
| C(15) | 7453(2) | -606(2)  | 8097(1) | 42(1)  |
| C(16) | 9119(2) | -458(2)  | 7733(1) | 45(1)  |
| C(17) | 7375(2) | -1357(2) | 9378(1) | 59(1)  |
| C(18) | 7336(3) | -131(3)  | 9981(2) | 88(1)  |
| C(19) | 8759(3) | -2898(3) | 9913(2) | 105(1) |
| O(1)  | 1495(1) | 2811(2)  | 5229(1) | 61(1)  |

|      |          |          |         |       |
|------|----------|----------|---------|-------|
| 0(2) | 2309(1)  | 1208(2)  | 7027(1) | 61(1) |
| 0(3) | 10092(1) | -1479(2) | 7453(1) | 75(1) |
| 0(4) | 9386(1)  | 891(2)   | 7757(1) | 62(1) |

Table 3. Bond lengths [Å] and angles [deg] for shelx1.

|             |          |
|-------------|----------|
| C(1)-O(1)   | 1.456(2) |
| C(1)-C(12)  | 1.481(2) |
| C(1)-C(2)   | 1.499(3) |
| C(1)-H(1)   | 0.9800   |
| C(2)-C(3)   | 1.532(3) |
| C(2)-H(2A)  | 0.9700   |
| C(2)-H(2B)  | 0.9700   |
| C(3)-C(4)   | 1.558(3) |
| C(3)-H(3A)  | 0.9700   |
| C(3)-H(3B)  | 0.9700   |
| C(4)-C(7)   | 1.521(2) |
| C(4)-C(5)   | 1.522(3) |
| C(4)-C(6)   | 1.527(3) |
| C(5)-H(5A)  | 0.9600   |
| C(5)-H(5B)  | 0.9600   |
| C(5)-H(5C)  | 0.9600   |
| C(6)-H(6A)  | 0.9600   |
| C(6)-H(6B)  | 0.9600   |
| C(6)-H(6C)  | 0.9600   |
| C(7)-C(12)  | 1.381(2) |
| C(7)-C(8)   | 1.393(2) |
| C(8)-C(9)   | 1.387(2) |
| C(8)-H(8)   | 0.9300   |
| C(9)-C(10)  | 1.403(2) |
| C(9)-H(9)   | 0.9300   |
| C(10)-C(11) | 1.401(2) |

|                 |            |
|-----------------|------------|
| C(10)-C(14)     | 1.465(2)   |
| C(11)-C(12)     | 1.379(2)   |
| C(11)-C(13)     | 1.472(2)   |
| C(13)-O(2)      | 1.2081(19) |
| C(13)-O(1)      | 1.352(2)   |
| C(14)-C(15)     | 1.330(2)   |
| C(14)-H(14)     | 0.9300     |
| C(15)-C(16)     | 1.496(2)   |
| C(15)-C(17)     | 1.518(2)   |
| C(16)-O(3)      | 1.2002(19) |
| C(16)-O(4)      | 1.314(2)   |
| C(17)-C(18)     | 1.516(3)   |
| C(17)-C(19)     | 1.522(3)   |
| C(17)-H(17)     | 0.9800     |
| C(18)-H(18A)    | 0.9600     |
| C(18)-H(18B)    | 0.9600     |
| C(18)-H(18C)    | 0.9600     |
| C(19)-H(19A)    | 0.9600     |
| C(19)-H(19B)    | 0.9600     |
| C(19)-H(19C)    | 0.9600     |
| O(4)-H(4)       | 0.8200     |
|                 |            |
| O(1)-C(1)-C(12) | 103.35(12) |
| O(1)-C(1)-C(2)  | 117.58(14) |
| C(12)-C(1)-C(2) | 109.25(15) |
| O(1)-C(1)-H(1)  | 108.8      |
| C(12)-C(1)-H(1) | 108.8      |
| C(2)-C(1)-H(1)  | 108.8      |
| C(1)-C(2)-C(3)  | 105.09(15) |
| C(1)-C(2)-H(2A) | 110.7      |
| C(3)-C(2)-H(2A) | 110.7      |
| C(1)-C(2)-H(2B) | 110.7      |

|                    |              |
|--------------------|--------------|
| C (3)-C (2)-H(2B)  | 110. 7       |
| H(2A)-C (2)-H(2B)  | 108. 8       |
| C (2)-C (3)-C (4)  | 116. 45 (15) |
| C (2)-C (3)-H(3A)  | 108. 2       |
| C (4)-C (3)-H(3A)  | 108. 2       |
| C (2)-C (3)-H(3B)  | 108. 2       |
| C (4)-C (3)-H(3B)  | 108. 2       |
| H(3A)-C (3)-H(3B)  | 107. 3       |
| C (7)-C (4)-C (5)  | 111. 26 (14) |
| C (7)-C (4)-C (6)  | 106. 98 (14) |
| C (5)-C (4)-C (6)  | 109. 57 (18) |
| C (7)-C (4)-C (3)  | 110. 28 (14) |
| C (5)-C (4)-C (3)  | 109. 10 (15) |
| C (6)-C (4)-C (3)  | 109. 61 (17) |
| C (4)-C (5)-H(5A)  | 109. 5       |
| C (4)-C (5)-H(5B)  | 109. 5       |
| H(5A)-C (5)-H(5B)  | 109. 5       |
| C (4)-C (5)-H(5C)  | 109. 5       |
| H(5A)-C (5)-H(5C)  | 109. 5       |
| H(5B)-C (5)-H(5C)  | 109. 5       |
| C (4)-C (6)-H(6A)  | 109. 5       |
| C (4)-C (6)-H(6B)  | 109. 5       |
| H(6A)-C (6)-H(6B)  | 109. 5       |
| C (4)-C (6)-H(6C)  | 109. 5       |
| H(6A)-C (6)-H(6C)  | 109. 5       |
| H(6B)-C (6)-H(6C)  | 109. 5       |
| C (12)-C (7)-C (8) | 114. 74 (12) |
| C (12)-C (7)-C (4) | 119. 73 (14) |
| C (8)-C (7)-C (4)  | 125. 01 (14) |
| C (9)-C (8)-C (7)  | 121. 97 (13) |
| C (9)-C (8)-H(8)   | 119. 0       |
| C (7)-C (8)-H(8)   | 119. 0       |



|                    |            |
|--------------------|------------|
| C(8)-C(9)-C(10)    | 122.77(13) |
| C(8)-C(9)-H(9)     | 118.6      |
| C(10)-C(9)-H(9)    | 118.6      |
| C(11)-C(10)-C(9)   | 114.25(12) |
| C(11)-C(10)-C(14)  | 119.64(12) |
| C(9)-C(10)-C(14)   | 126.05(12) |
| C(12)-C(11)-C(10)  | 121.96(12) |
| C(12)-C(11)-C(13)  | 106.11(12) |
| C(10)-C(11)-C(13)  | 131.38(13) |
| C(11)-C(12)-C(7)   | 123.42(13) |
| C(11)-C(12)-C(1)   | 110.10(13) |
| C(7)-C(12)-C(1)    | 125.85(13) |
| O(2)-C(13)-O(1)    | 120.92(13) |
| O(2)-C(13)-C(11)   | 129.67(14) |
| O(1)-C(13)-C(11)   | 109.39(13) |
| C(15)-C(14)-C(10)  | 130.24(13) |
| C(15)-C(14)-H(14)  | 114.9      |
| C(10)-C(14)-H(14)  | 114.9      |
| C(14)-C(15)-C(16)  | 122.85(12) |
| C(14)-C(15)-C(17)  | 122.00(13) |
| C(16)-C(15)-C(17)  | 115.11(12) |
| O(3)-C(16)-O(4)    | 124.52(14) |
| O(3)-C(16)-C(15)   | 122.60(16) |
| O(4)-C(16)-C(15)   | 112.88(12) |
| C(18)-C(17)-C(15)  | 110.14(15) |
| C(18)-C(17)-C(19)  | 111.30(18) |
| C(15)-C(17)-C(19)  | 113.29(16) |
| C(18)-C(17)-H(17)  | 107.3      |
| C(15)-C(17)-H(17)  | 107.3      |
| C(19)-C(17)-H(17)  | 107.3      |
| C(17)-C(18)-H(18A) | 109.5      |
| C(17)-C(18)-H(18B) | 109.5      |

|                     |            |
|---------------------|------------|
| H(18A)-C(18)-H(18B) | 109.5      |
| C(17)-C(18)-H(18C)  | 109.5      |
| H(18A)-C(18)-H(18C) | 109.5      |
| H(18B)-C(18)-H(18C) | 109.5      |
| C(17)-C(19)-H(19A)  | 109.5      |
| C(17)-C(19)-H(19B)  | 109.5      |
| H(19A)-C(19)-H(19B) | 109.5      |
| C(17)-C(19)-H(19C)  | 109.5      |
| H(19A)-C(19)-H(19C) | 109.5      |
| H(19B)-C(19)-H(19C) | 109.5      |
| C(13)-O(1)-C(1)     | 110.06(12) |
| C(16)-O(4)-H(4)     | 109.5      |

---

Symmetry transformations used to generate equivalent atoms:

Table 4. Anisotropic displacement parameters ( $\text{Å}^2 \times 10^3$ ) for shelxl.

The anisotropic displacement factor exponent takes the form:

$$-2 \pi^2 [ h^2 a^*^2 U_{11} + \dots + 2 h k a^* b^* U_{12} ]$$

---

|      | U11    | U22   | U33   | U23    | U13   | U12    |
|------|--------|-------|-------|--------|-------|--------|
| C(1) | 48(1)  | 69(1) | 46(1) | -18(1) | -1(1) | -7(1)  |
| C(2) | 67(1)  | 69(1) | 69(1) | -7(1)  | 0(1)  | 11(1)  |
| C(3) | 85(1)  | 66(1) | 51(1) | 0(1)   | -5(1) | 3(1)   |
| C(4) | 75(1)  | 47(1) | 39(1) | -8(1)  | 4(1)  | -16(1) |
| C(5) | 95(1)  | 85(1) | 37(1) | -11(1) | 11(1) | -23(1) |
| C(6) | 147(2) | 56(1) | 81(1) | -10(1) | -4(1) | -42(1) |
| C(7) | 54(1)  | 44(1) | 34(1) | -16(1) | 9(1)  | -15(1) |

---

|       |        |        |       |        |        |        |
|-------|--------|--------|-------|--------|--------|--------|
| C(8)  | 45(1)  | 57(1)  | 39(1) | -16(1) | 16(1)  | -19(1) |
| C(9)  | 36(1)  | 57(1)  | 39(1) | -13(1) | 8(1)   | -11(1) |
| C(10) | 35(1)  | 42(1)  | 37(1) | -15(1) | 7(1)   | -14(1) |
| C(11) | 37(1)  | 45(1)  | 36(1) | -18(1) | 8(1)   | -15(1) |
| C(12) | 43(1)  | 44(1)  | 37(1) | -17(1) | 3(1)   | -9(1)  |
| C(13) | 35(1)  | 64(1)  | 46(1) | -22(1) | 5(1)   | -16(1) |
| C(14) | 35(1)  | 52(1)  | 37(1) | -12(1) | 10(1)  | -17(1) |
| C(15) | 37(1)  | 50(1)  | 37(1) | -12(1) | 6(1)   | -13(1) |
| C(16) | 32(1)  | 61(1)  | 37(1) | -13(1) | 3(1)   | -7(1)  |
| C(17) | 46(1)  | 85(1)  | 37(1) | -4(1)  | 4(1)   | -23(1) |
| C(18) | 83(1)  | 143(2) | 44(1) | -36(1) | 18(1)  | -35(1) |
| C(19) | 100(2) | 104(2) | 64(1) | 17(1)  | -11(1) | -3(1)  |
| O(1)  | 36(1)  | 87(1)  | 53(1) | -21(1) | 4(1)   | -7(1)  |
| O(2)  | 40(1)  | 99(1)  | 48(1) | -21(1) | 15(1)  | -29(1) |
| O(3)  | 48(1)  | 80(1)  | 90(1) | -33(1) | 19(1)  | -2(1)  |
| O(4)  | 46(1)  | 82(1)  | 73(1) | -35(1) | 25(1)  | -33(1) |

Table 5. Hydrogen coordinates ( $\times 10^4$ ) and isotropic displacement parameters ( $\text{\AA}^2 \times 10^3$ ) for shelxl.

|       | x    | y    | z    | U(eq) |
|-------|------|------|------|-------|
| H(1)  | 1892 | 2655 | 3661 | 67    |
| H(2A) | 2169 | 5579 | 3896 | 94    |
| H(2B) | 694  | 5436 | 3194 | 94    |
| H(3A) | 2636 | 6134 | 1907 | 92    |
| H(3B) | 2582 | 4392 | 2004 | 92    |
| H(5A) | 6794 | 3578 | 1842 | 112   |
| H(5B) | 5326 | 4865 | 1002 | 112   |
| H(5C) | 5225 | 3093 | 1579 | 112   |

|        |       |       |       |     |
|--------|-------|-------|-------|-----|
| H(6A)  | 4892  | 6082  | 3470  | 142 |
| H(6B)  | 5271  | 6626  | 2178  | 142 |
| H(6C)  | 6624  | 5319  | 3102  | 142 |
| H(8)   | 7750  | 2330  | 3870  | 56  |
| H(9)   | 8252  | 547   | 5694  | 54  |
| H(14)  | 5179  | -323  | 7680  | 49  |
| H(17)  | 6329  | -1642 | 9488  | 71  |
| H(18A) | 8369  | 135   | 9922  | 132 |
| H(18B) | 7161  | -577  | 10774 | 132 |
| H(18C) | 6453  | 826   | 9626  | 132 |
| H(19A) | 8722  | -3669 | 9538  | 157 |
| H(19B) | 8621  | -3338 | 10714 | 157 |
| H(19C) | 9806  | -2661 | 9824  | 157 |
| H(4)   | 10291 | 941   | 7522  | 93  |

---

Table 6. Torsion angles [deg] for shelxl.

|                      |             |
|----------------------|-------------|
| O(1)-C(1)-C(2)-C(3)  | 175.14(15)  |
| C(12)-C(1)-C(2)-C(3) | 57.9(2)     |
| C(1)-C(2)-C(3)-C(4)  | -63.2(2)    |
| C(2)-C(3)-C(4)-C(7)  | 36.4(2)     |
| C(2)-C(3)-C(4)-C(5)  | 158.91(18)  |
| C(2)-C(3)-C(4)-C(6)  | -81.1(2)    |
| C(5)-C(4)-C(7)-C(12) | -128.50(17) |
| C(6)-C(4)-C(7)-C(12) | 111.86(19)  |
| C(3)-C(4)-C(7)-C(12) | -7.3(2)     |
| C(5)-C(4)-C(7)-C(8)  | 60.2(2)     |
| C(6)-C(4)-C(7)-C(8)  | -59.5(2)    |
| C(3)-C(4)-C(7)-C(8)  | -178.62(15) |
| C(12)-C(7)-C(8)-C(9) | -5.3(2)     |
| C(4)-C(7)-C(8)-C(9)  | 166.46(15)  |

|                                 |             |
|---------------------------------|-------------|
| $C(7) - C(8) - C(9) - C(10)$    | -3.1(2)     |
| $C(8) - C(9) - C(10) - C(11)$   | 6.4(2)      |
| $C(8) - C(9) - C(10) - C(14)$   | -170.85(14) |
| $C(9) - C(10) - C(11) - C(12)$  | -1.46(19)   |
| $C(14) - C(10) - C(11) - C(12)$ | 175.99(12)  |
| $C(9) - C(10) - C(11) - C(13)$  | -171.76(15) |
| $C(14) - C(10) - C(11) - C(13)$ | 5.7(2)      |
| $C(10) - C(11) - C(12) - C(7)$  | -7.3(2)     |
| $C(13) - C(11) - C(12) - C(7)$  | 165.18(13)  |
| $C(10) - C(11) - C(12) - C(1)$  | -178.56(13) |
| $C(13) - C(11) - C(12) - C(1)$  | -6.12(16)   |
| $C(8) - C(7) - C(12) - C(11)$   | 10.4(2)     |
| $C(4) - C(7) - C(12) - C(11)$   | -161.82(13) |
| $C(8) - C(7) - C(12) - C(1)$    | -179.73(14) |
| $C(4) - C(7) - C(12) - C(1)$    | 8.1(2)      |
| $O(1) - C(1) - C(12) - C(11)$   | 9.66(17)    |
| $C(2) - C(1) - C(12) - C(11)$   | 135.60(15)  |
| $O(1) - C(1) - C(12) - C(7)$    | -161.38(14) |
| $C(2) - C(1) - C(12) - C(7)$    | -35.4(2)    |
| $C(12) - C(11) - C(13) - O(2)$  | -178.14(16) |
| $C(10) - C(11) - C(13) - O(2)$  | -6.7(3)     |
| $C(12) - C(11) - C(13) - O(1)$  | -0.14(17)   |
| $C(10) - C(11) - C(13) - O(1)$  | 171.30(14)  |
| $C(11) - C(10) - C(14) - C(15)$ | -164.62(15) |
| $C(9) - C(10) - C(14) - C(15)$  | 12.5(2)     |
| $C(10) - C(14) - C(15) - C(16)$ | -5.6(2)     |
| $C(10) - C(14) - C(15) - C(17)$ | 172.21(15)  |
| $C(14) - C(15) - C(16) - O(3)$  | -89.8(2)    |
| $C(17) - C(15) - C(16) - O(3)$  | 92.24(19)   |
| $C(14) - C(15) - C(16) - O(4)$  | 90.31(18)   |
| $C(17) - C(15) - C(16) - O(4)$  | -87.64(17)  |
| $C(14) - C(15) - C(17) - C(18)$ | -100.14(19) |

|                         |             |
|-------------------------|-------------|
| C(16)-C(15)-C(17)-C(18) | 77.84(18)   |
| C(14)-C(15)-C(17)-C(19) | 134.48(19)  |
| C(16)-C(15)-C(17)-C(19) | -47.5(2)    |
| O(2)-C(13)-O(1)-C(1)    | -175.33(15) |
| C(11)-C(13)-O(1)-C(1)   | 6.46(17)    |
| C(12)-C(1)-O(1)-C(13)   | -9.71(17)   |
| C(2)-C(1)-O(1)-C(13)    | -130.12(17) |

---

Symmetry transformations used to generate equivalent atoms:

Table 7. Hydrogen bonds for shelxl [A and deg.].

---

| D-H...A            | d(D-H) | d(H...A) | d(D...A)   | <(DHA) |
|--------------------|--------|----------|------------|--------|
| O(4)-H(4)...O(2)#1 | 0.82   | 1.85     | 2.6684(19) | 175.1  |

---

Symmetry transformations used to generate equivalent atoms:

#1 x+1, y, z

S34.The chiral HPLC chromatogram of 1.

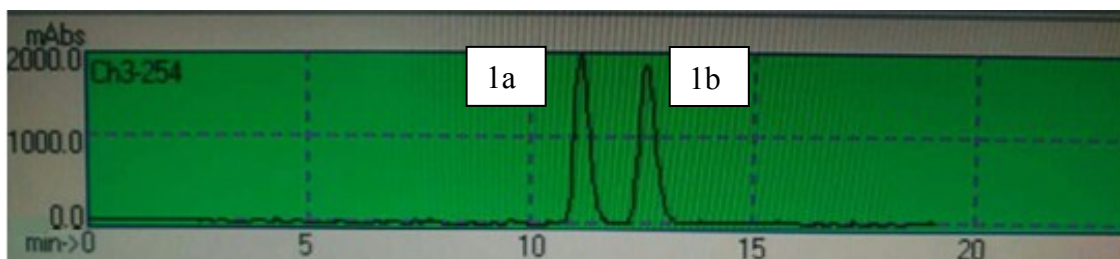

Figure S34.The chiral HPLC chromatogram of 1.

S35.The chiral HPLC chromatogram of 2.

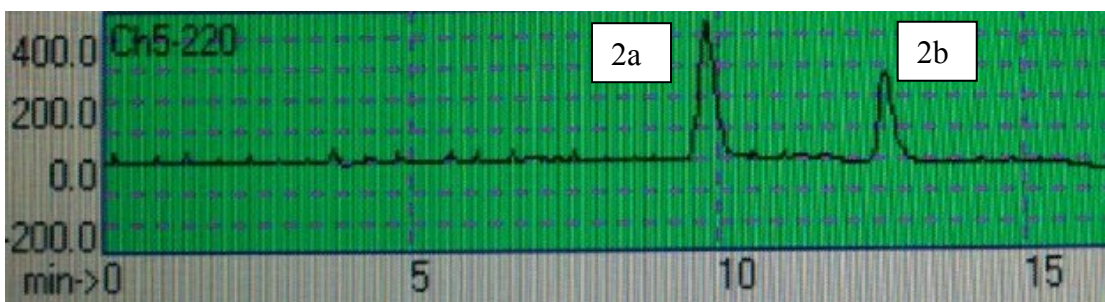

Figure S35.The chiral HPLC chromatogram of 2.

S36.The chiral HPLC chromatogram of 3.

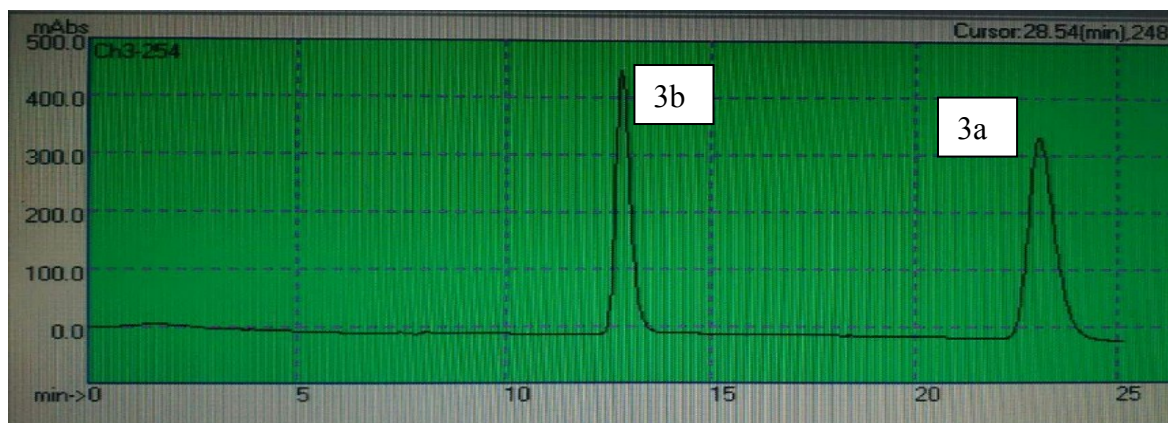

Figure S36.The chiral HPLC chromatogram of 3.

S37.The chiral HPLC chromatogram of 4.

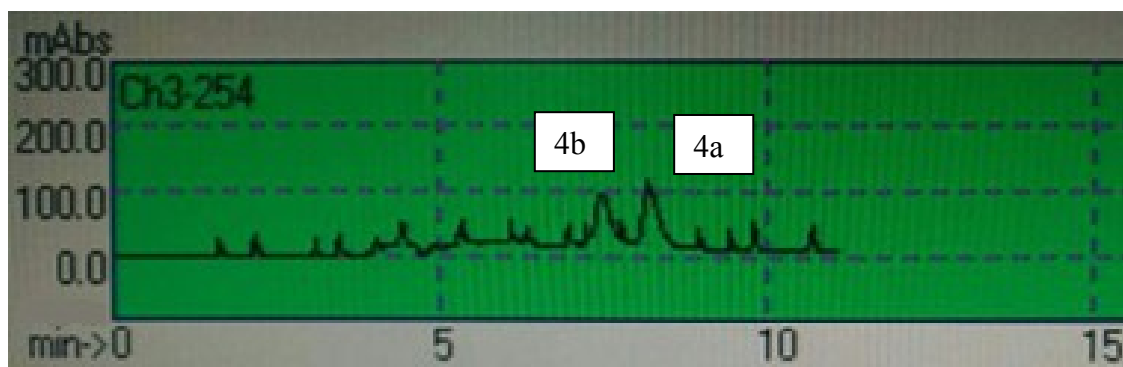

Figure S37.The chiral HPLC chromatogram of 4.



**S38 The CD spectra of 1 in MeOH.**

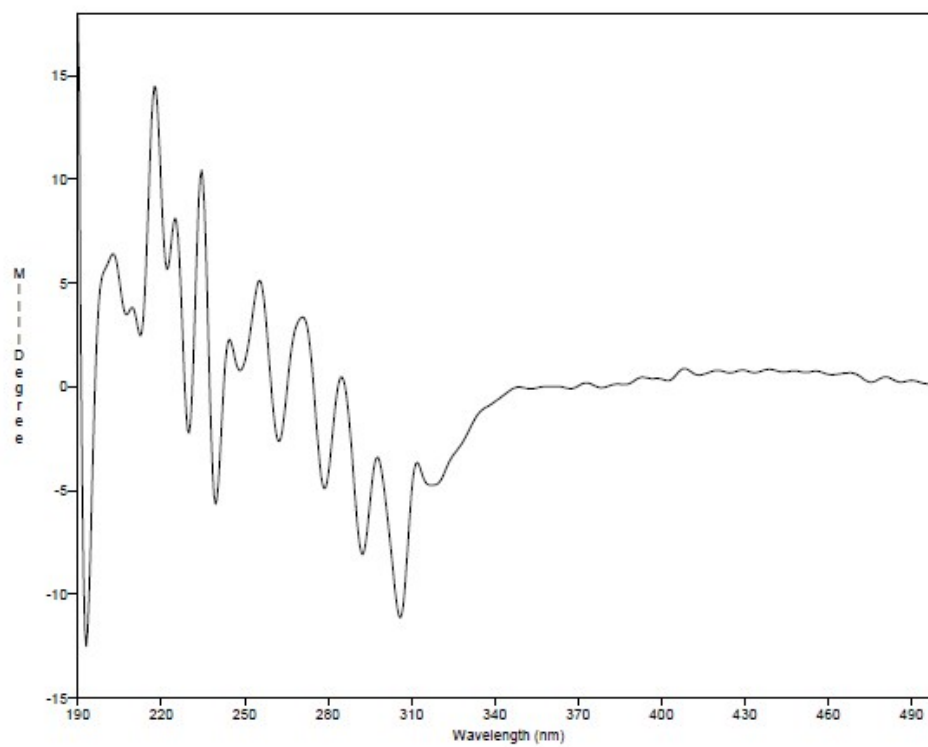

**S39 The CD spectra of 1a in MeOH.**

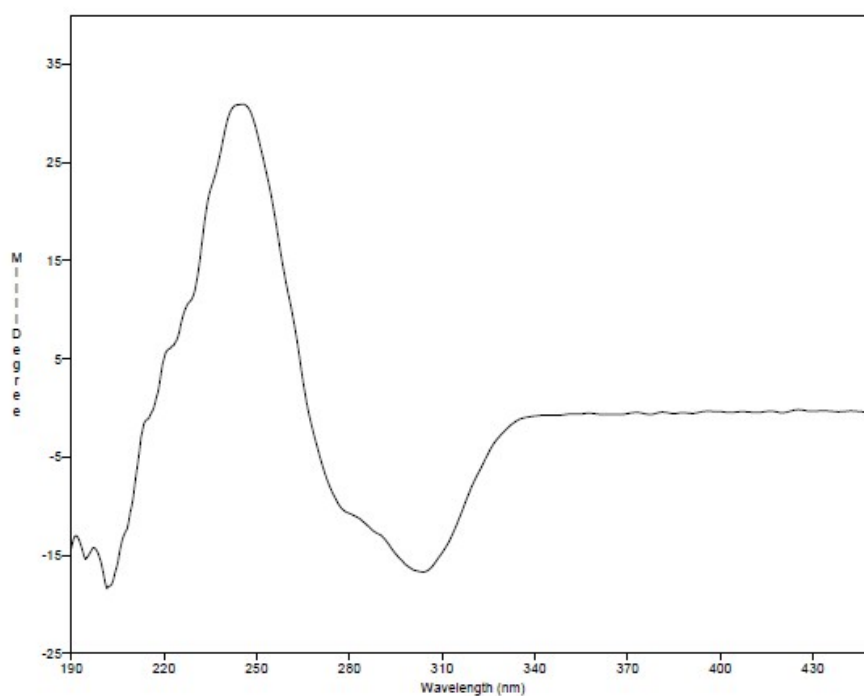

CD spectrum of 1a

**S40 The CD spectra of 1b in MeOH.**

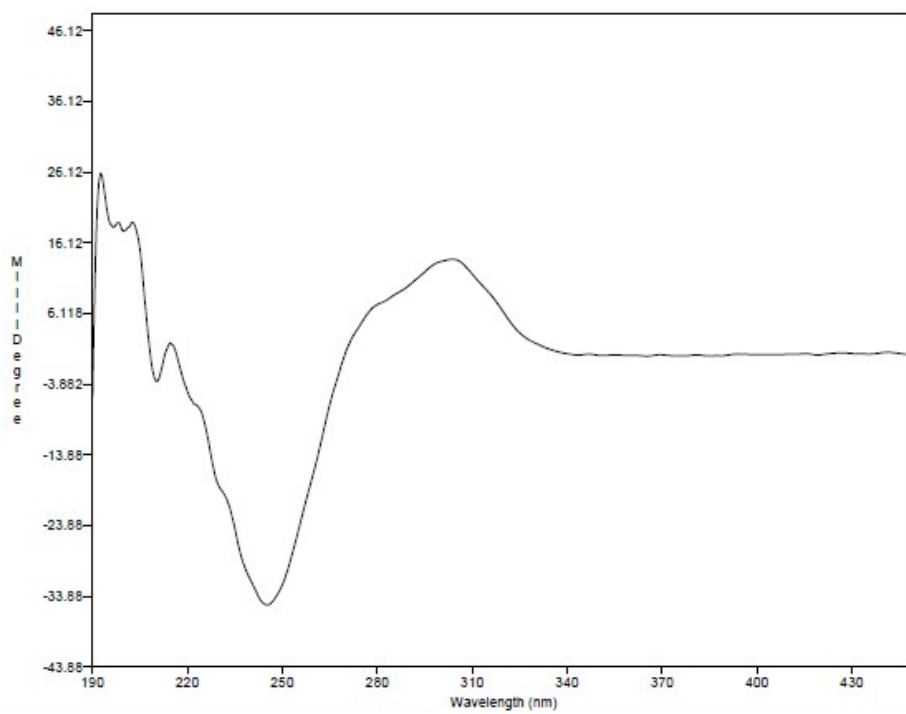

CD spectrum of 1

**S41 The CD spectra of 2a in MeOH.**

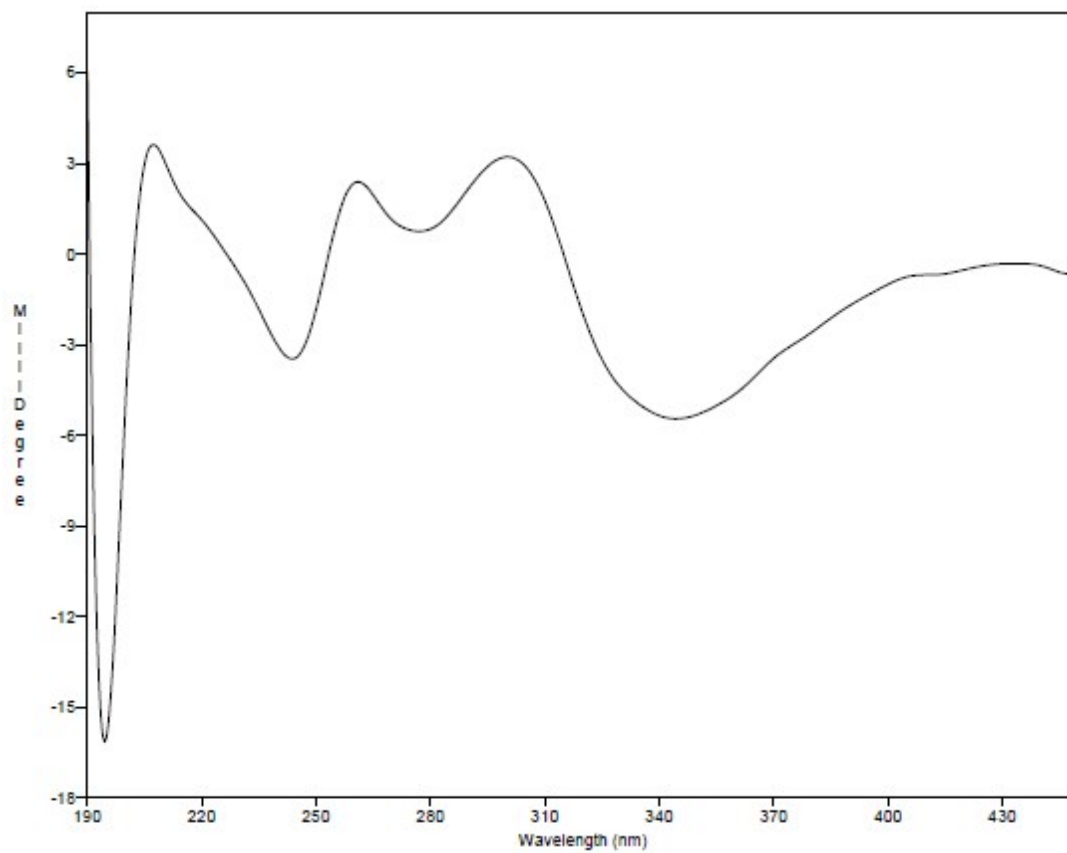

CD spectrum of **2a**

**S42 The CD spectra of 2b in MeOH.**

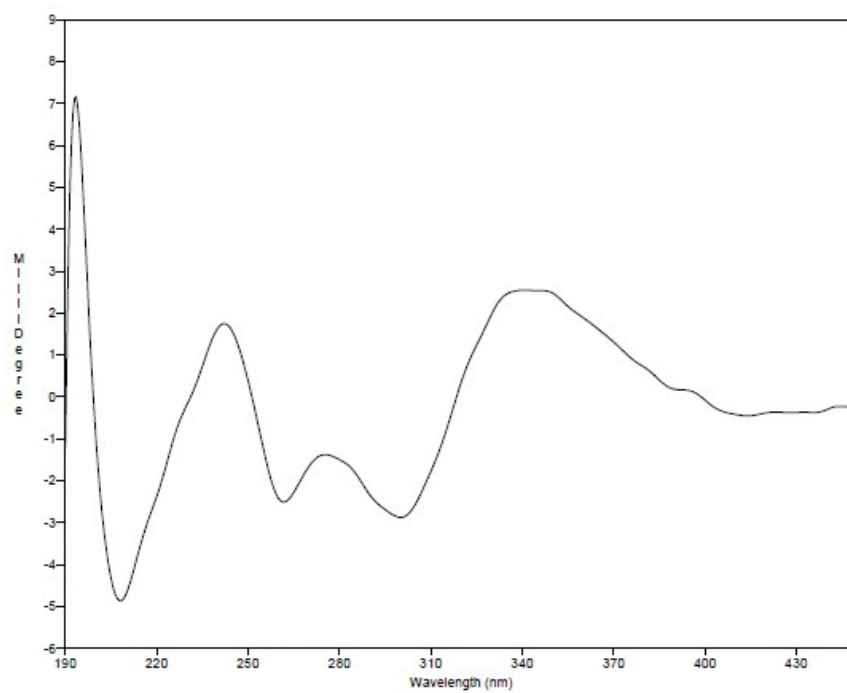

**CD spectrum of 2b**

**S43 The CD spectra of 3a in MeOH.**

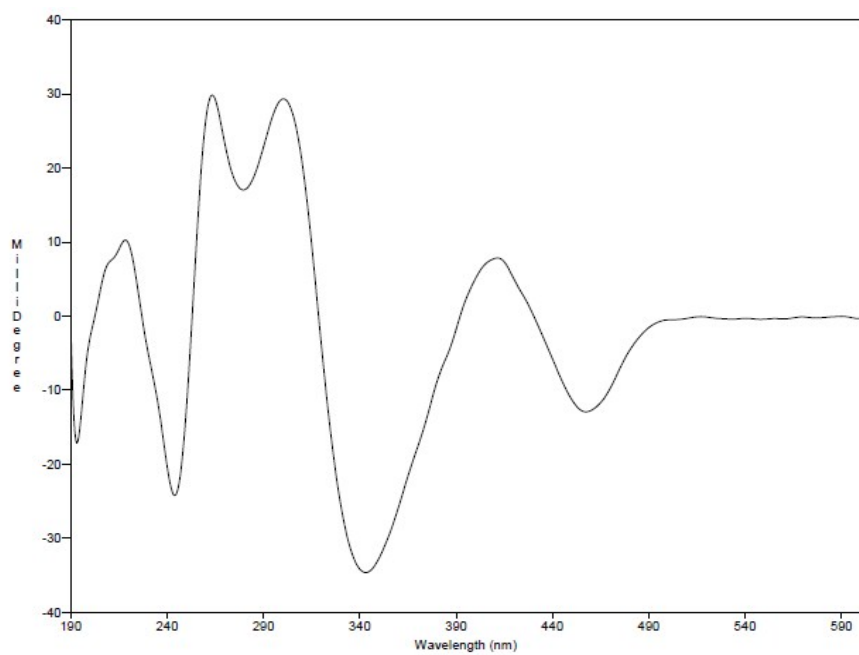

**CD spectrum of 3a**

S44 The CD spectra of **3b** in MeOH.

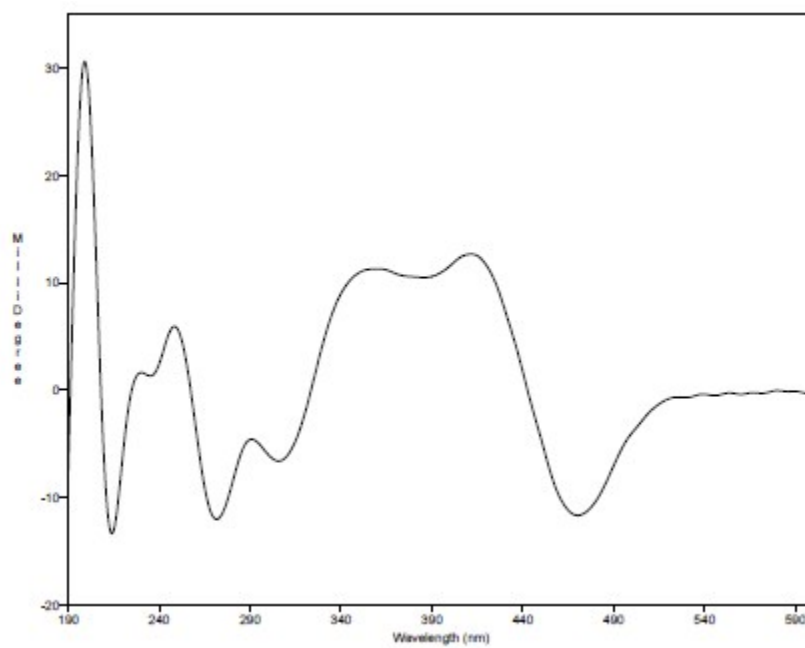

CD spectrum of **3b**

S45 The calculated CD spectra of 3a and 3b in MeOH.

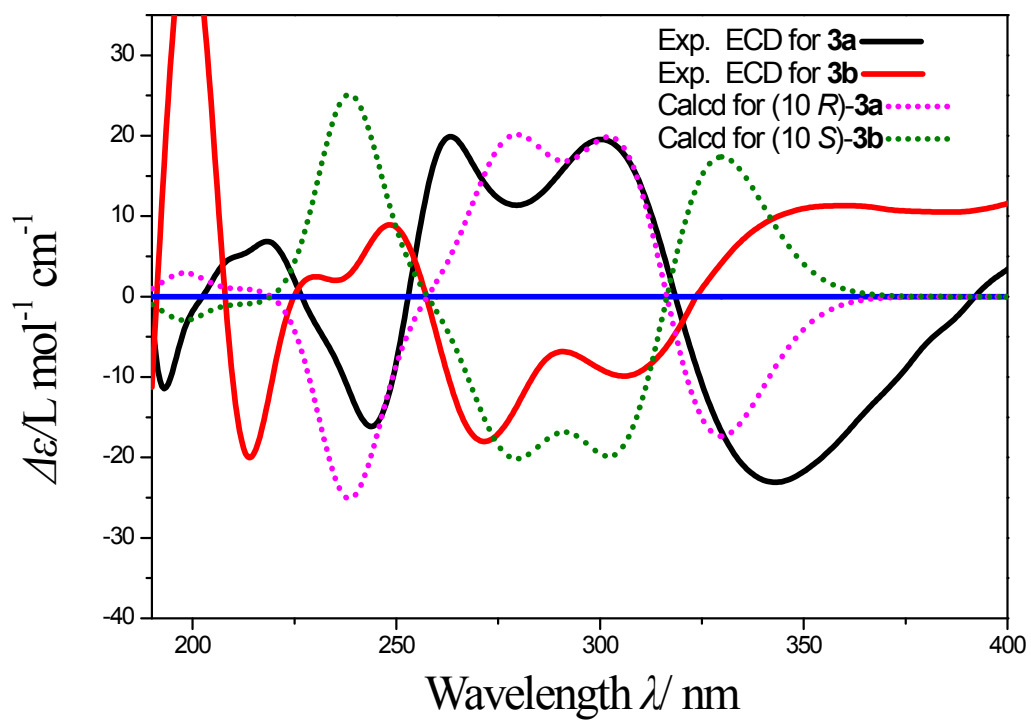



**S46 The CD spectra of 4a in MeOH.**

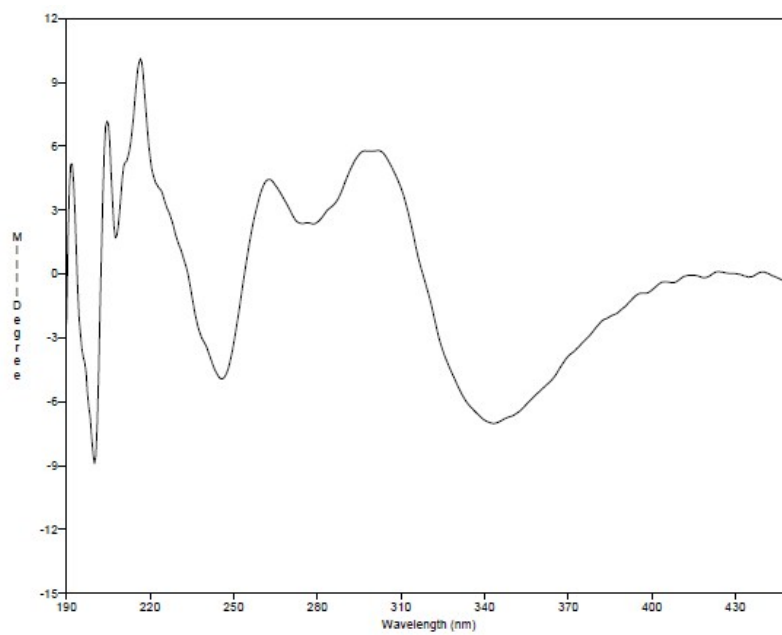

**CD spectrum of 4a**

**S47 The CD spectra of 4b in MeOH**

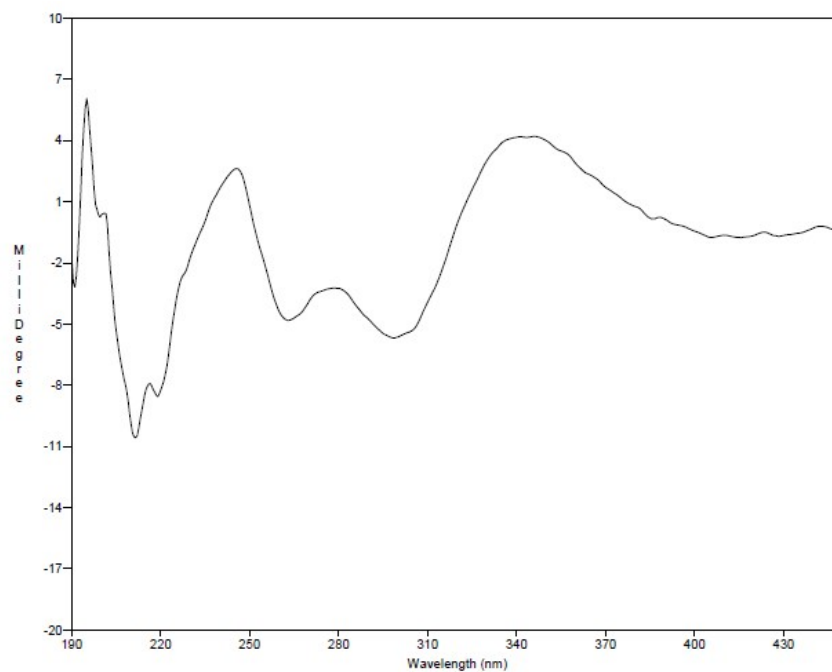

CD spectrum of **4b**

S48 The calculated CD spectra of 4a and 4b in MeOH

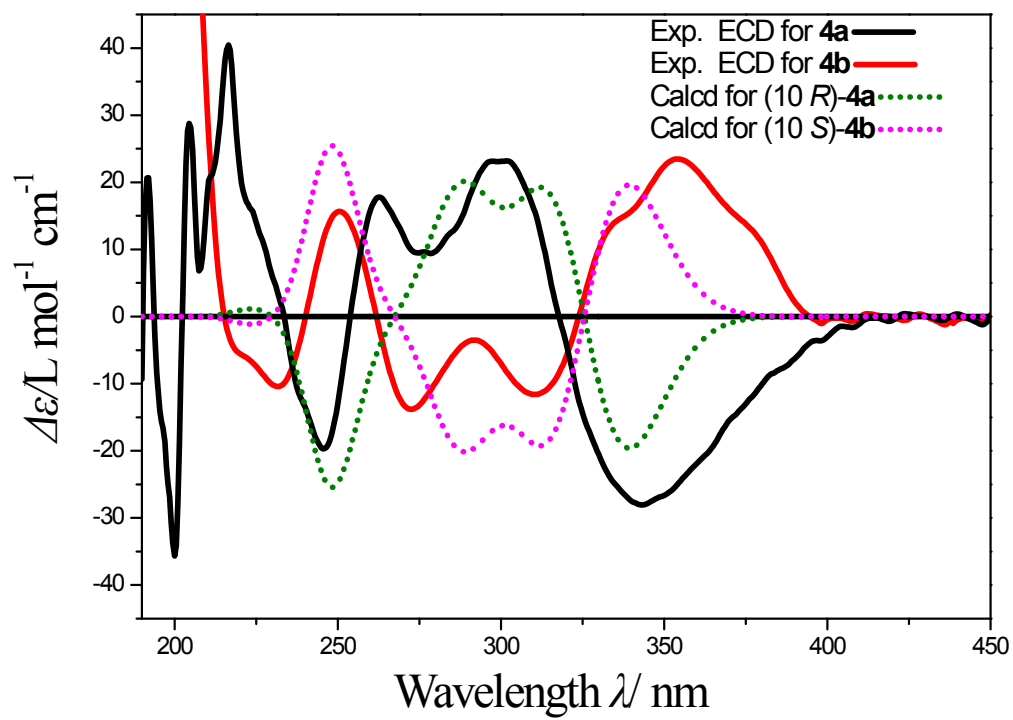

# S49 ES-MS spectrum of 1.

Ms

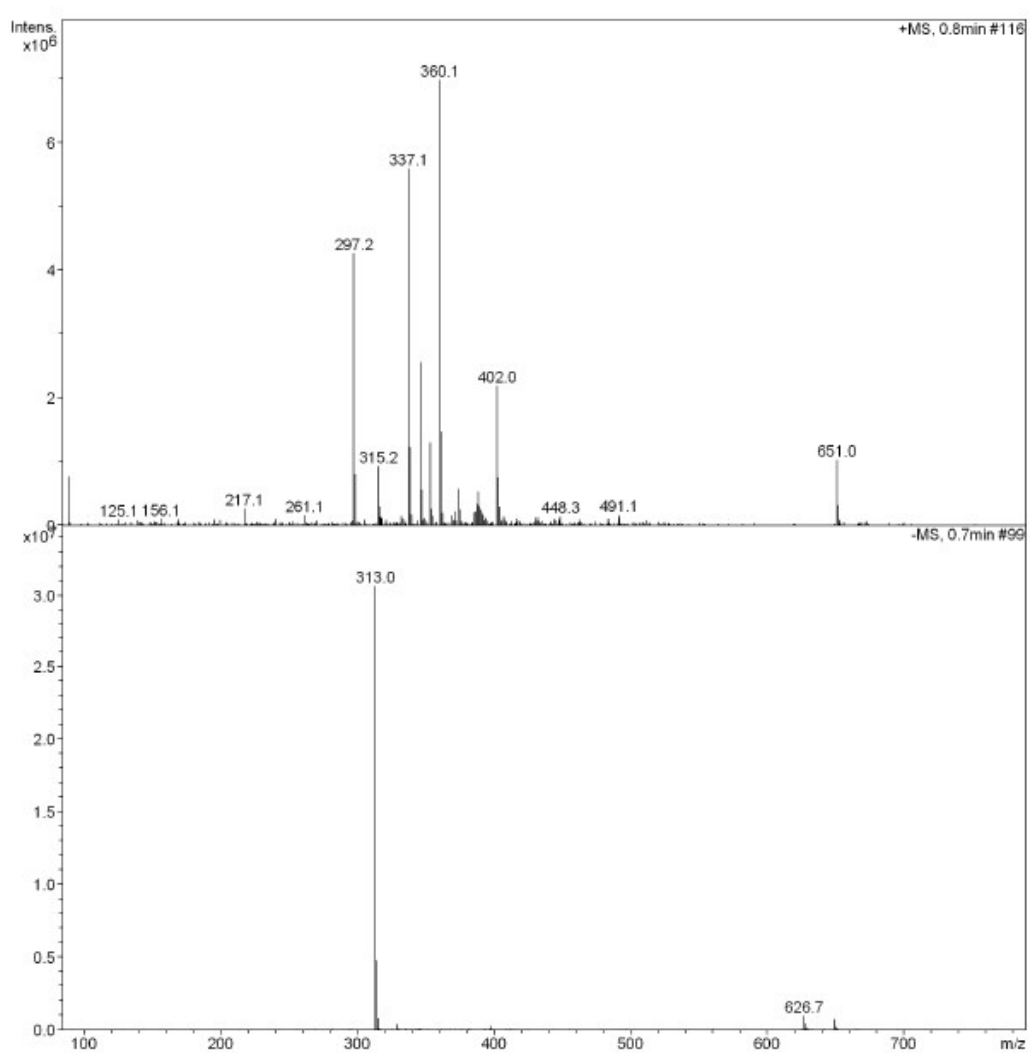

# Ms<sup>2</sup>

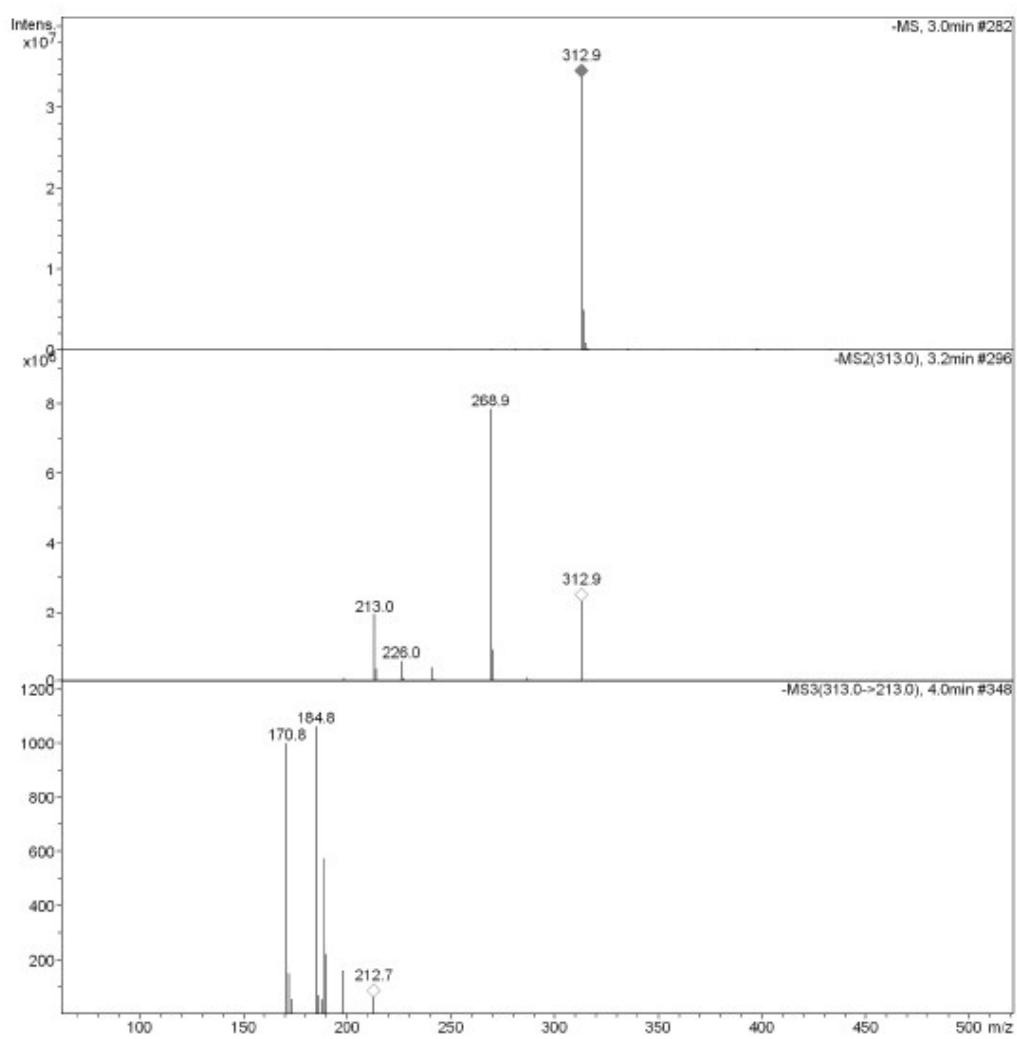

# Ms<sup>3</sup>

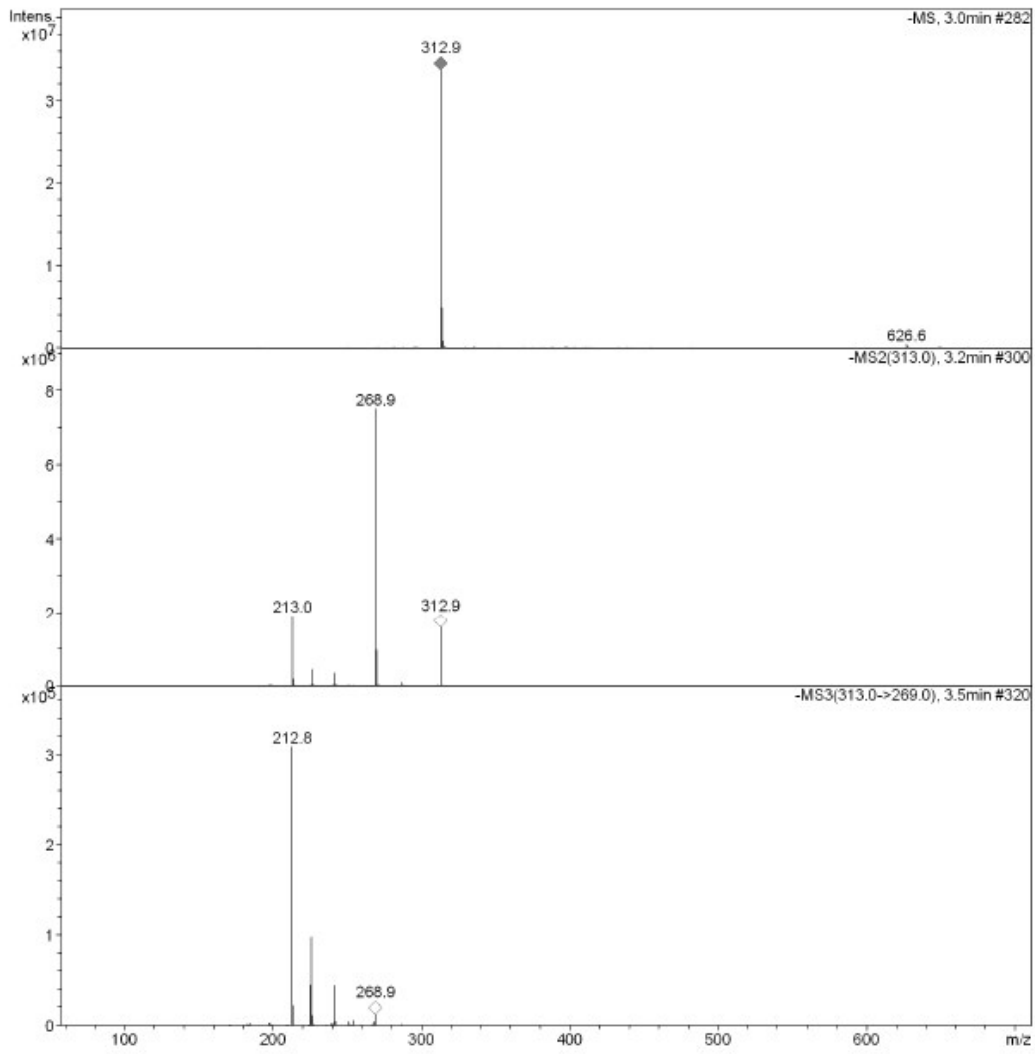

## S50 ES-MS spectrum of 2.

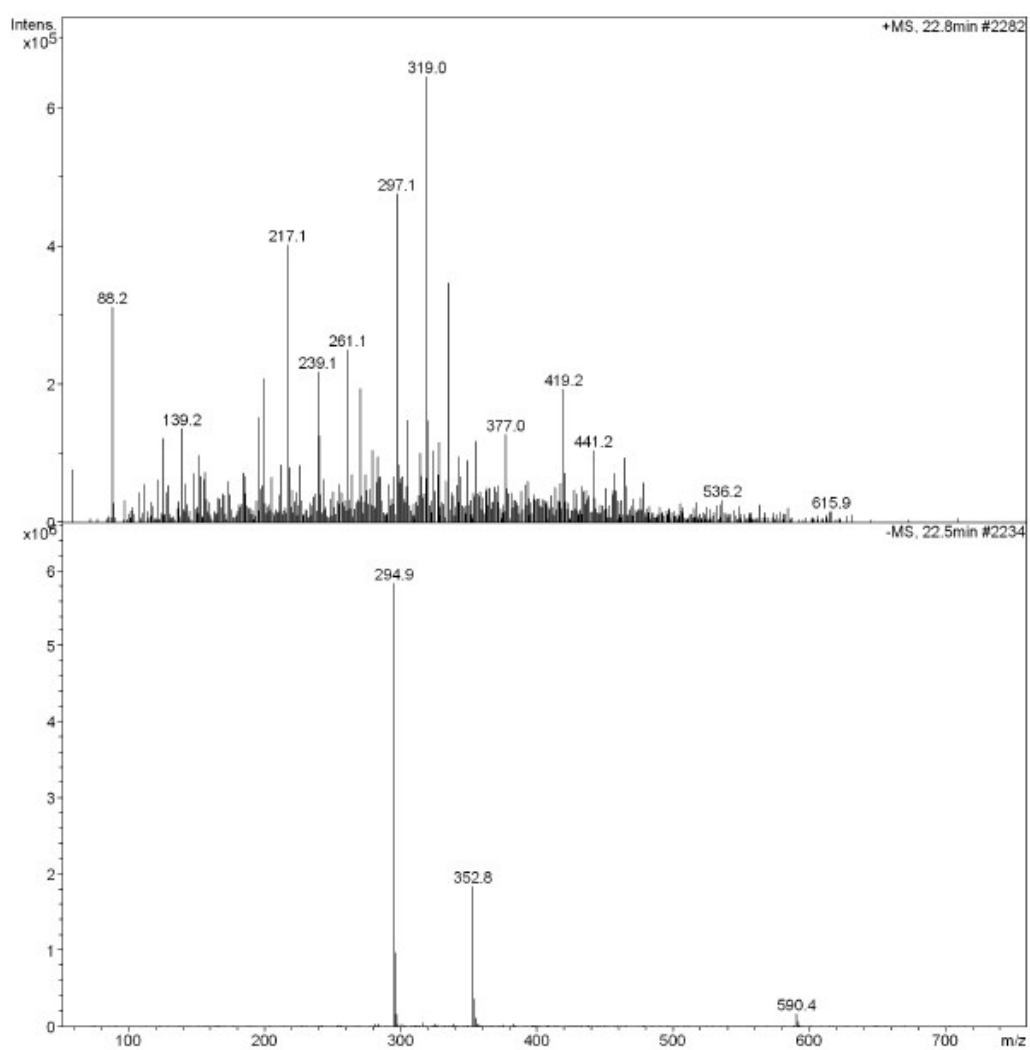

**Ms<sup>2</sup>**

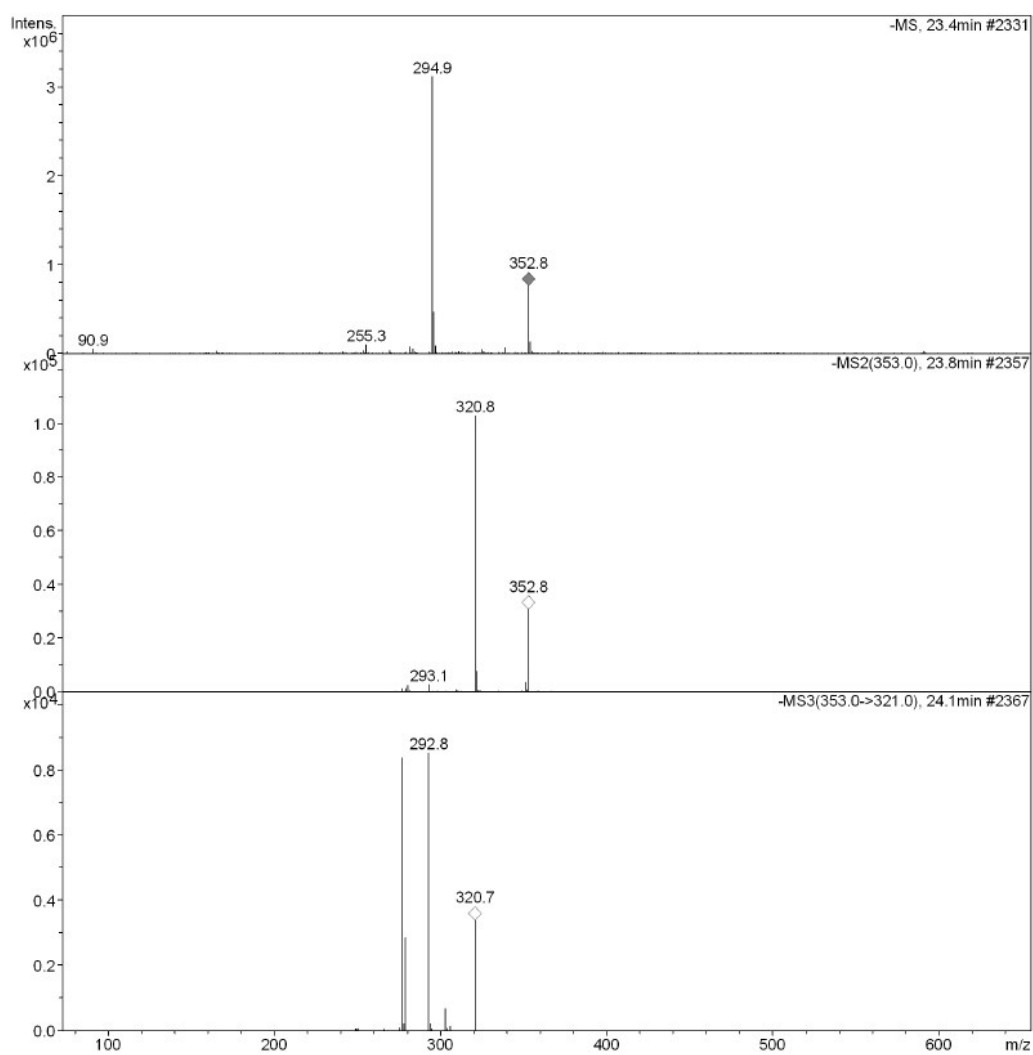

**Ms<sup>3</sup>**



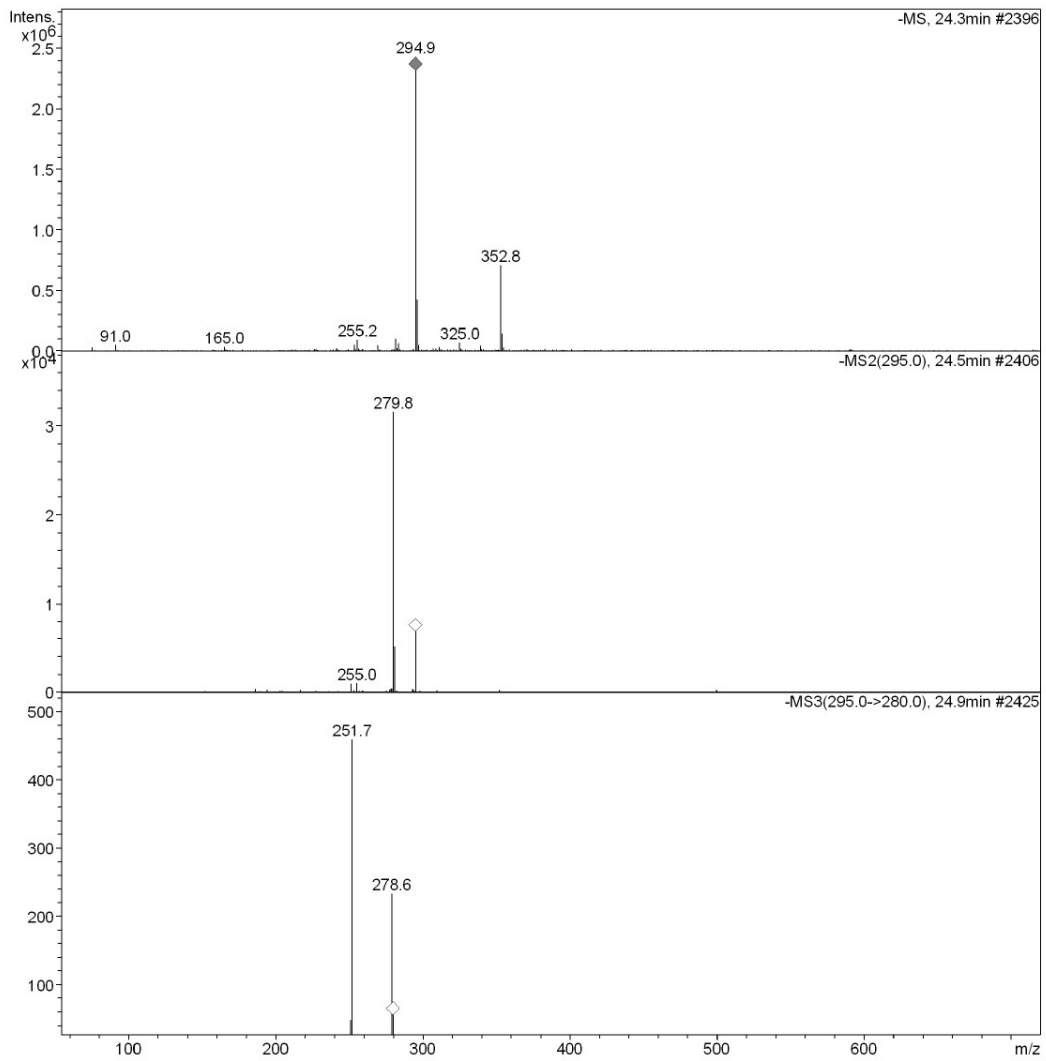

### S51 ES-MS spectrum of 3.

#### Ms

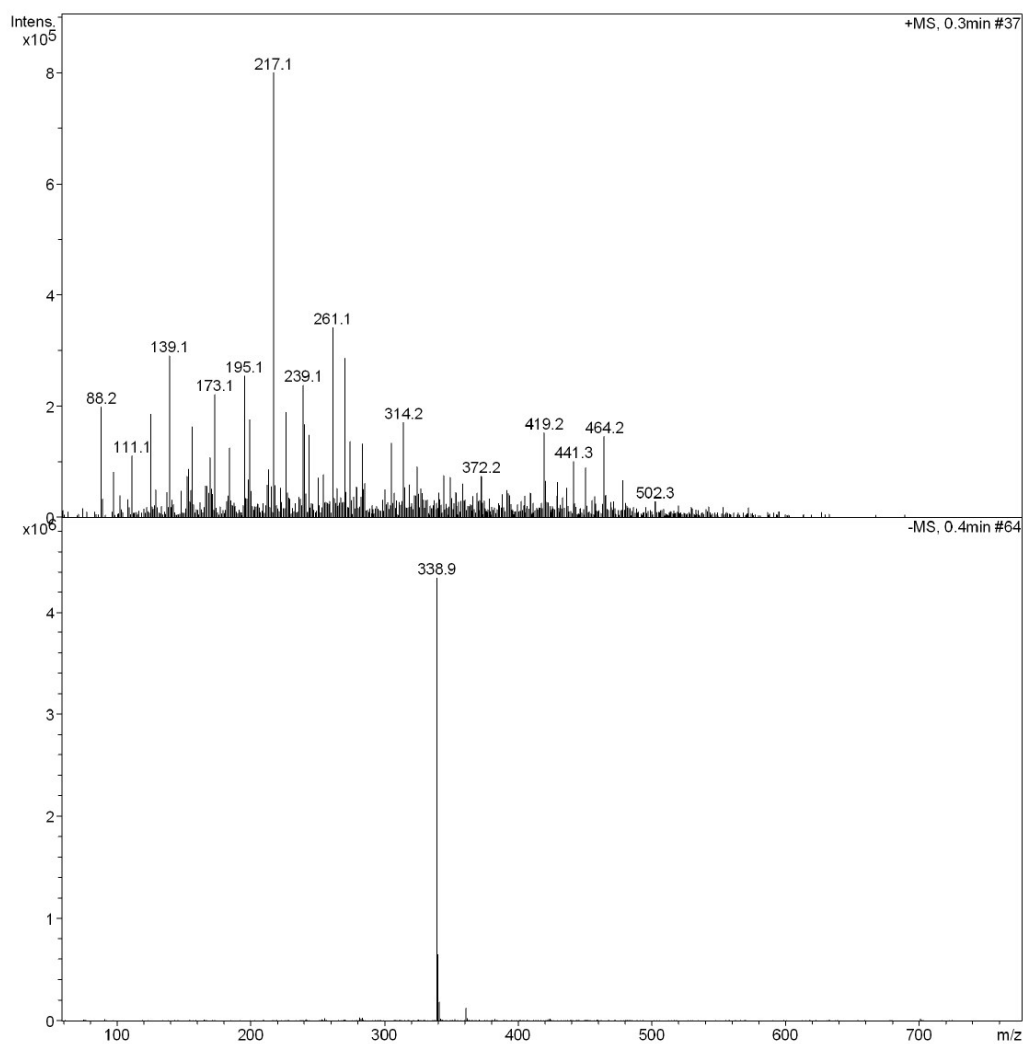

#### Ms<sup>2</sup>

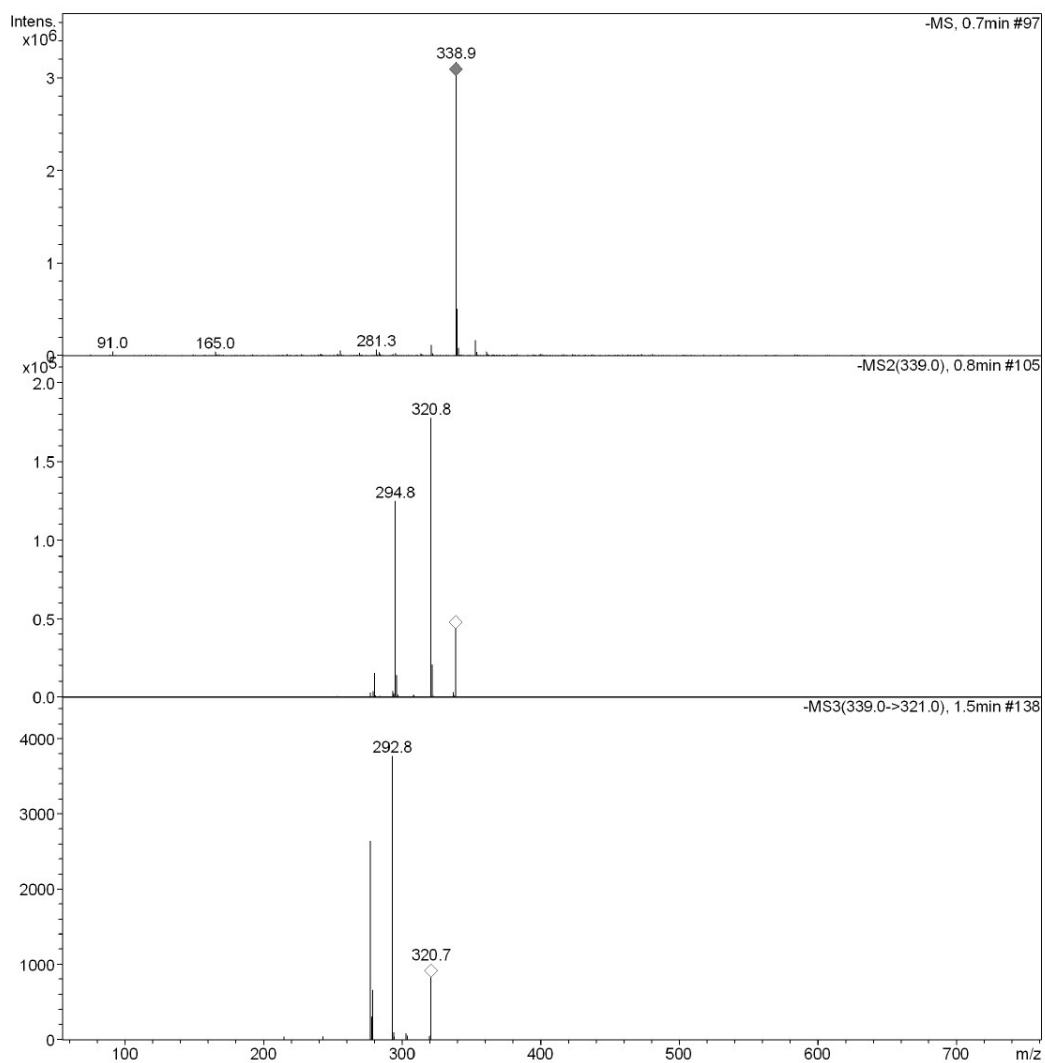

**Ms<sup>3</sup>**

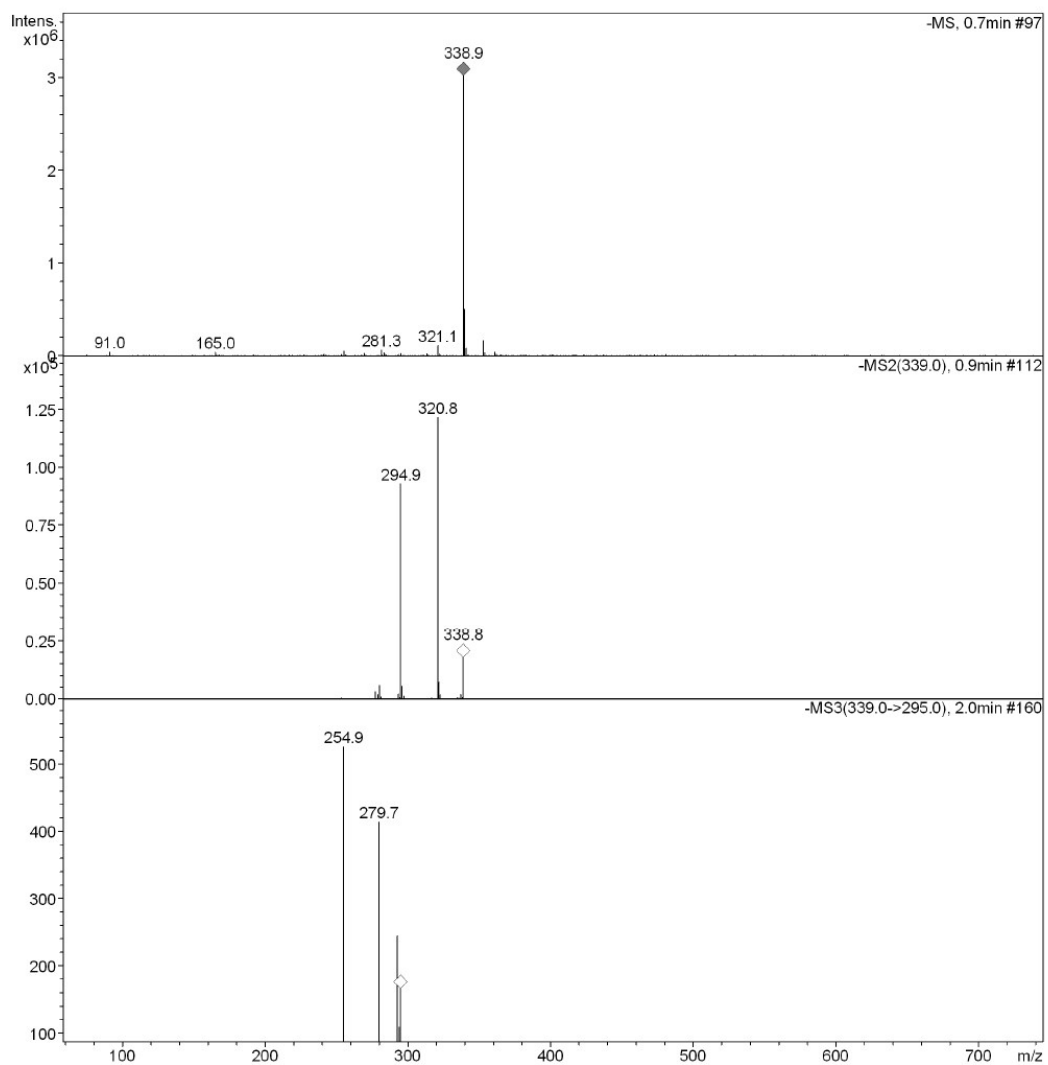

# S52 ES-MS spectrum of 4.

## Ms

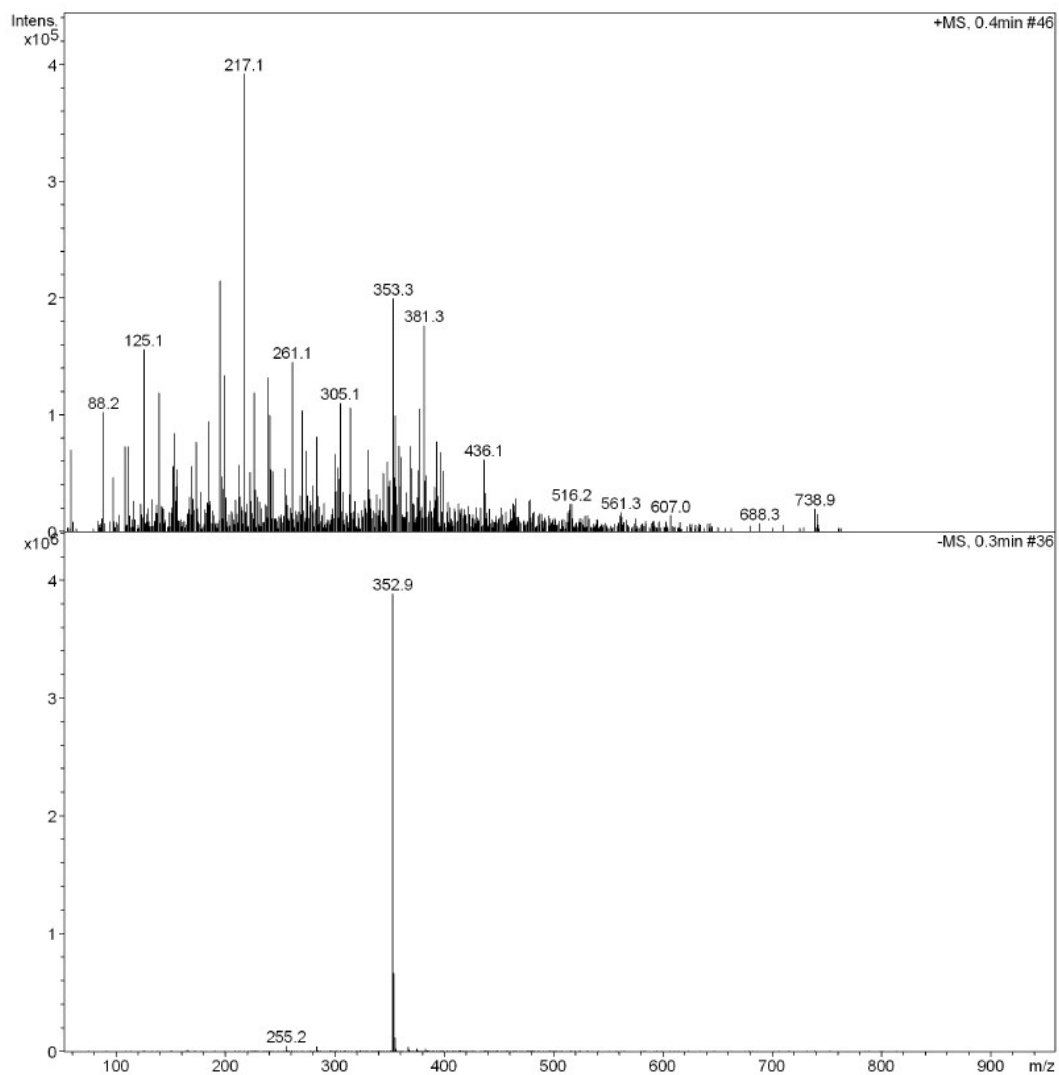

## Ms<sup>2</sup>

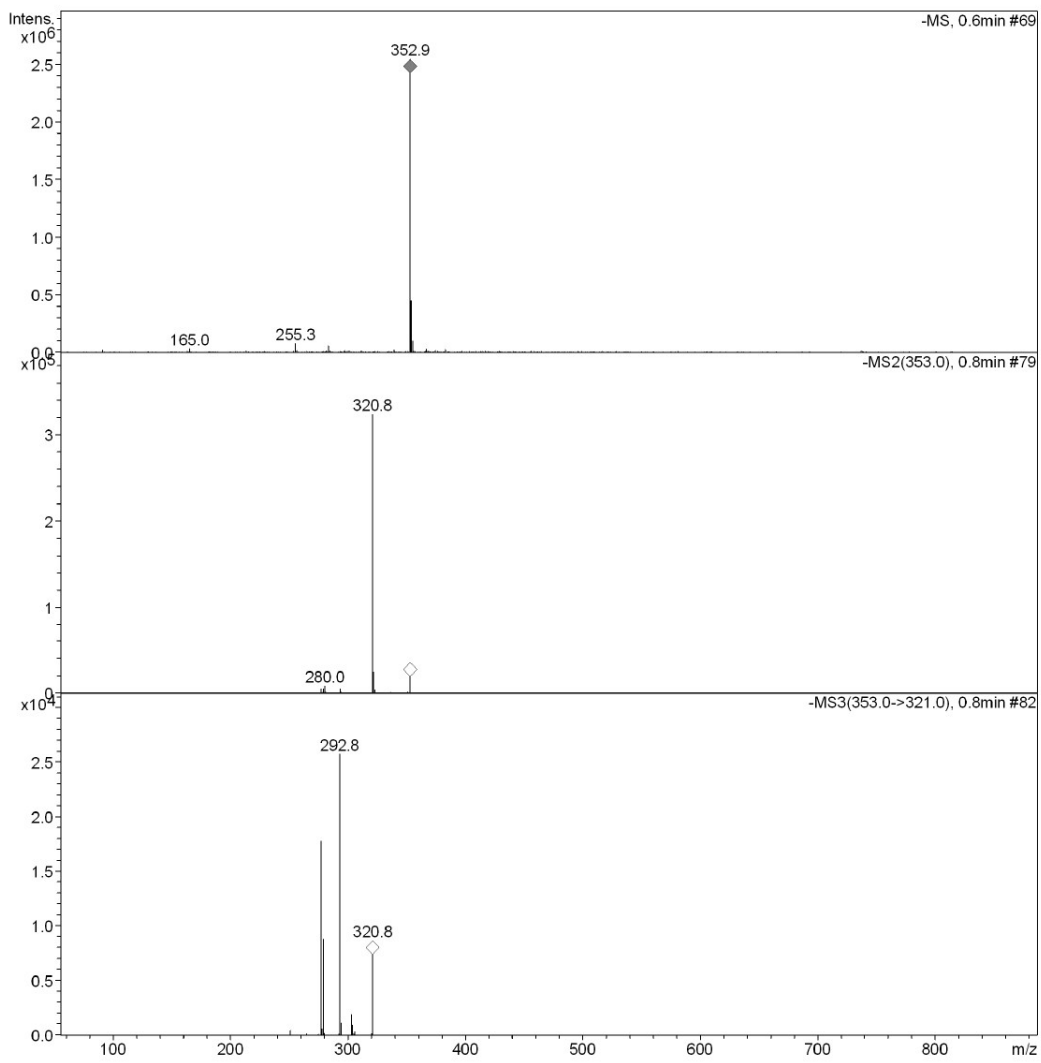

## Tables

### 1 Conformations of 1a and 1b

Table S1. Conformations of 1a and 1b were Obtained after the Optimization.

| no.  | conformer                                                                           | population (%) |
|------|-------------------------------------------------------------------------------------|----------------|
| 1a-1 | 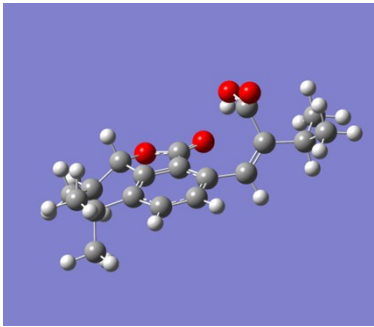   | 99.22          |
| 1a-2 |   | 0.78           |
| 1b-1 |  | 98.93          |
| 1b-2 |  | 1.07           |

## 2 Conformations of 2a and 2b

Table S2. Conformations of 2a and 2b were Obtained after the Optimization.

| no.  | conformer                                                                                                                                                                                                                                                                                                                                                                                                | population (%) |
|------|----------------------------------------------------------------------------------------------------------------------------------------------------------------------------------------------------------------------------------------------------------------------------------------------------------------------------------------------------------------------------------------------------------|----------------|
| 2a-1 | 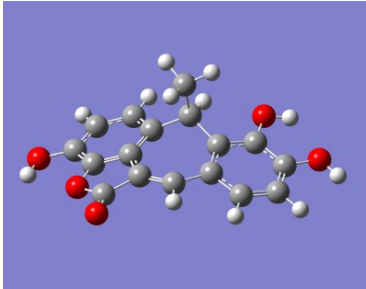 A ball-and-stick model of a complex organic molecule, likely a substituted benzene derivative, shown in a 3D perspective view. The atoms are represented by spheres: carbon (grey), oxygen (red), and hydrogen (white). The molecule is oriented with one oxygen atom pointing upwards and another pointing downwards. | 75.68          |
| 2a-2 |  A ball-and-stick model of the same molecule as 2a-1, but in a different conformation. The oxygen atoms are in different positions, reflecting a rotation around a bond.                                                                                                                                                | 24.32          |
| 2b-1 |  A ball-and-stick model of a different molecule, 2b, shown in a 3D perspective view. It has a similar structure to 2a but with a different arrangement of atoms.                                                                                                                                                       | 75.11          |
| 2b-2 |  A ball-and-stick model of the same molecule as 2b-1, but in a different conformation, showing a different orientation of the oxygen atoms.                                                                                                                                                                           | 24.89          |



### 3 Conformations of 3a and 3b

Table S3. Conformations of 3a and 3b were Obtained after the Optimization.

| no.  | conformer                                                                           | population (%) |
|------|-------------------------------------------------------------------------------------|----------------|
| 3a-1 | 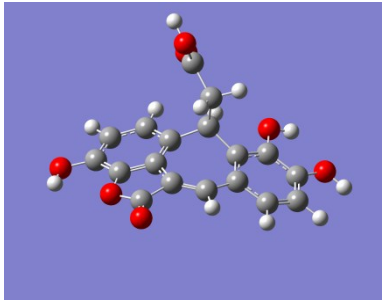   | 53.51          |
| 3a-2 |   | 12.71...       |
| 3a-3 |  | 8.88           |
| 3a-4 |  | 24.91          |
| 3b-1 |  | 50.30          |

|      |                                                                                    |       |
|------|------------------------------------------------------------------------------------|-------|
| 3b-2 | 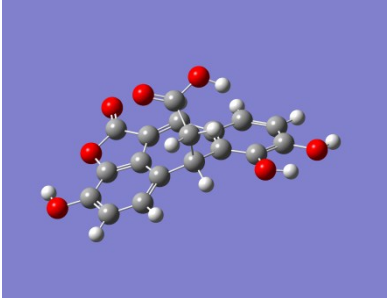  | 13.55 |
| 3b-3 |   | 9.35  |
| 3b-4 |  | 26.80 |

## 4 Conformations of 4a and 4a

Table S4. Conformations of 4a and 4b were Obtained after the Optimization.

| no.  | conformer                                                                            | population (%) |
|------|--------------------------------------------------------------------------------------|----------------|
| 4a-1 | 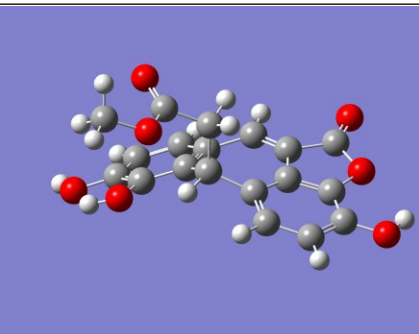   | 96.55          |
| 4a-2 |   | 3.45           |
| 4b-1 |  | 98.97          |
| 4b-2 |  | 1.03           |

## 5 The toxic effect of the isolates in H9c2 cells after 24 h incubation

**Table S5** The survival rate of the cell **H9c2** (%) (M±SD)

|    | CON      | Comp. + H <sub>2</sub> O <sub>2</sub> |              |             |
|----|----------|---------------------------------------|--------------|-------------|
|    |          | 100μM                                 | 50μM         | 25μM        |
| 1a | 100±5.78 | 96.96±3.01                            | 100.47±4.02  | 101.3±2.24  |
| 1b | 100±5.78 | 116.1±5.14*                           | 102.53±2.33  | 109.26±6.34 |
| 2a | 100±5.75 | 91.98±1.76*                           | 90.50±2.04** | 95.32±2.66  |
| 2b | 100±5.75 | 94.16±1.67                            | 91.79±2.69   | 97.62±2.77  |
| 3a | 100±5.75 | 105.16±1.67                           | 115.21±2.69  | 105.52±2.77 |
| 3b | 100±5.75 | 100.41±6.33                           | 102.87±5.54  | 101.39±8.39 |
| 4a | 100±5.78 | 108.94±4.69                           | 108.305±6.97 | 103.98±5.66 |
| 4b | 100±5.78 | 110.83±9.07                           | 113.01±6.81  | 112.58±6.92 |

###:P<0.001 Vs Control; \*,P<0.05 Vs model; \*\*: P<0.01 Vs model; \*\*\*:P<0.001 Vs model

## 6 The cytoprotective effects of the isolates assessed using LDH leakage assays

**Table S6** Effects of 2-hour isolates pretreatment on LDH activity in each group

|         | Con (U/L) | H <sub>2</sub> O <sub>2</sub> (200 μM)<br>(U/L) | Comp. + H <sub>2</sub> O <sub>2</sub> (U/L) |        |        |
|---------|-----------|-------------------------------------------------|---------------------------------------------|--------|--------|
|         |           |                                                 | 25μM                                        | 50μM   | 100μM  |
| Comp.2a | 96.67     | 296.67                                          | 273.33                                      | 250    | 226.67 |
| Comp.2b | 96.67     | 296.67                                          | 256.67                                      | 246.67 | 240    |
| Comp.3a | 96.67     | 296.67                                          | 206.67                                      | 253.33 | 220    |
| Comp.3b | 96.67     | 296.67                                          | 246.67                                      | 250    | 230    |

LDH, Lactate dehydrogenase

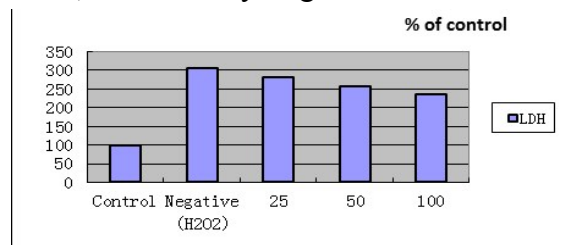

2a

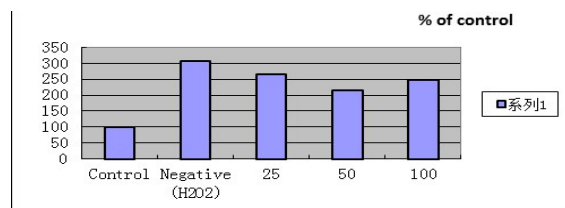

2b

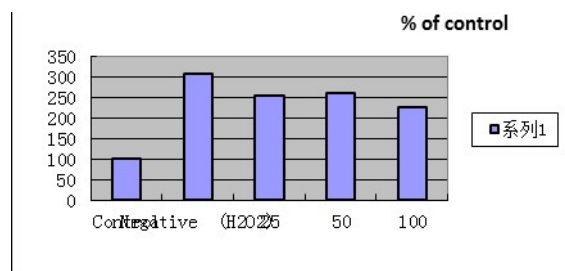

3a

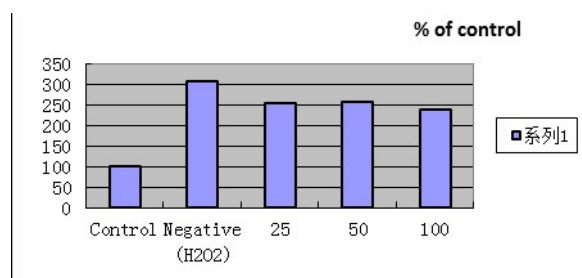

3b

## S The toxic effect of isolates in LPS-induced N9 cell viability

**Table S7** The survival rate of the cell N9 (%) (M±SD)

|         | CON      | LPS<br>(1 µg/mL) | Comp. + LPS |             |                       |
|---------|----------|------------------|-------------|-------------|-----------------------|
|         |          |                  | 0.3µM       | 3.0µM       | 30.0µM                |
| Comp.1a | 100±1.34 | 99.34±1.48       | 100.14±1.79 | 98.07±1.89  | 99.75±1.53            |
| Comp.1b | 100±4.06 | 98.12±2.01       | 100.34±1.11 | 99.17±1.09  | 101.2±0.87            |
| Comp.2a | 100±1.54 | 99.46±0.42       | 103.18±1.74 | 99.93±0.89  | 100.00±2.17           |
| Comp.2b | 100±2.04 | 100.52±10.4      | 100.03±1.67 | 99.71±1.41  | 99.52±0.85            |
| Comp.3a | 100±1.00 | 98.90±2.16       | 100.29±0.85 | 100.15±0.36 | 102.15±1.86           |
| Comp.3b | 100±0.91 | 99.26±0.82       | 98.69±0.60  | 101.19±1.20 | 99.55±1.07            |
| Comp.4a | 100±0.59 | 101.79±0.79      | 99.46±1.15  | 98.35±0.76  | 101.31±0.89           |
| Comp.4b | 100±1.18 | 101.57±2.08      | 98.76±3.33  | 99.63±0.87  | 98.56±0.52            |
| MINO    | 100±2.5  | 100.35±1.35      | -           | -           | 101.28±0.53<br>20.0µM |

###:P<0.001 Vs Control; \*:P<0.05 Vs model; \*\*: P<0.01 Vs model;  
\*\*\*:P<0.001 Vs mod
